# Supplementary material
Source: publisher figshare collection journal article supplement (https://tandf.figshare.com/articles/dataset/_/21546128)
Supplement: Supplementary file 1 [file 1]

## Sheet: Sheet1
Author	Title	Year of publication	VIs for residency/ fellowship	Specialty	Country	Brief summary of study	Study aims or objectives	Description of virtual interviews and details of how conducted (if provided)	Type of study	Study method	Timing of data collection	Participants and # for each group (RR = response rate)	Summary of the outcomes that address our research questions	Program director, interviewer or program coordinator outcomes	Applicant outcomes	Other outcomes	Application inflation / interviews completed / Control measures	Rank Outcomes	Match Outcomes (e.g., geographic location)	Cost Outcomes	Environmental impact / carbon footprint	Key points from discussion	Lessons learned (what worked, what didn't work)	Limitations reported by primary study authors	Conclusions by primary study authors	Implications for future practice, policy or research (author proposed or reviewer proposed)	Quality Assessment for Quantitative studies: Risk of bias in study methodology (MERSQI)								Quality Assessment for Qualitative studies: CASP
																											SD	SI	SRR	D	VE	DAS	DAA	O	1. Clear Aims	2. Appropriate Methods	3. Appropriate Design	4. Recruitment Strategy	5. Data Collection	6. Relationship	7. Ethical Issues	8. Data Analysis	9. Findings	10. Value
Abdelwahab et al.	Cross-sectional study of dermatology residency home match incidence during the COVID-19 pandemic	2021	residency	dermatology	USA	Match analysis conducted by examining publicly available data for the 2017-19 and 2021 dermatology residency match.	To provide empirical data on how the pandemic influenced the incidence of matching into one's home institution in the 2021 dermatology match.	N/A	Quantitative	Match analysis	After Match, before arrival in program	69 programs (RR 56%) in 2021, ~65 programs (RR 50%) in 2017-19	Match outcomes changed, with home matches and likelihood of matching at least one home applicant increasing. Home matching occurred with greater frequency at larger programs compared to smaller programs.	N/A	N/A	N/A	N/A	N/A	Home matches increased from an average of 24% for the 2017-19 match cycles to 31% in 2021 (p = 0.025). Programs had greater odds of matching at least 1 home applicant (odds ratio 2.3, p = 0.02). Home matching occurred more frequently at larger programs with more spots (p = 0.00001)	N/A	N/A	The increase in home matching is likely driven by VIs and the reduction / cessation of away rotations. Applicants and programs were hindered in their ability to acquaint themselves with each other, resulting in applicants and programs ranking their home counterparts higher. Students without home programs are inherently disadvantaged.	N/A	None described	As institutions move towards hybrid models, understanding changes in match outcomes is key to understanding how to best incorporate VIs while maintaining equity for applicants (especially those without home programs).	If VIs persist, this may drive behavior around away rotations if limits are lifted. Prioritizing applicants without home programs for away rotations may have merit. There may be impacts on equity due to the cost of away rotations.	1	1.5	1	3	N/A	2	1	2
Al Saiegh et al.	Virtual residency training interviews in the age of COVID-19 and beyond	2020	residency	neurosurgery	USA	Simulated two VI models (static vs dynamic) followed by a survey of preference, efficiency, technical issues, and connection.	To compare two models of VI to assess feasibility and uncover technical challenges in preparation for the upcoming VI season.	Static VI model: followed the traditional IPI structure, where interviewees rotated through several rooms meeting with different interviewers for ~ 10 min each. Using Zoom, physical rooms were replaced with meeting IDs and each interviewer assigned an ID. Dynamic VI model: one meeting was joined by all participants and an administrator. After an overview, an administrator paired 1 interviewer and…	Quantitative	Survey	After simulated VIs	5 resident interviewers; 10 4th-year student interviewees (RR = 100%)	VI Format: Dynamic model has advantages to a static model, though each is viable.	N/A	N/A	1. Which model was preferred: Dynamic (66.7%), Static (33.3%). 2. Which model ran more seamlessly and was felt to be more time efficient: Dynamic (80%), Static (20%). 3. Which model had more technical issues in terms of audio/video, bandwidth, etc.: Neither (66.7%), Dynamic (20%), Static (6.6%), Both (6.6%). 4. Which model allowed stronger connections with the interviewer/interviewee: Both (40%),…	N/A	N/A	N/A	N/A	N/A	In most cases, participants had no technical issues with either model. Dynamic was more preferred overall and ran more seamlessly. The dynamic model allowed interviewees to feel more natural / comfortable and removed the onus of the interview away form the applicants and placed more responsibility on the residency coordinator. This allowed nervous applicants to focus more on the interview than on…	The dynamic model removed the need to track multiple meeting IDs. The breakout room allowed applicants to potentially connect with and form bonds with other applicants.	Not described	VIs are a necessary alternative to residency applications in the wake of COVID-19. Our simulation has shown that they can be performed seamlessly and efficiently using the 2 models we provided, which can be adopted by other programs to assess applicants.	A simulated model may not reflect the true interview experience. Future trials in a real-world scenario may be beneficial. Evaluating the breakout room experience as a tool for connection between applicants and/or current residents would be a future area of research.	2	0.5	1.5	1	0	1	1	1
Aljamaan et al.	Faculty members' perspective on virtual interviews for medical residency matching during the COVID-19 crisis: a national survey	2021	residency	multiple internal medicine, psychiatry, radiology, OB/GYN, dermatology, pediatrics, surgery, pharmacy, pathology, neurology, neurosurgery, ophthalmology, family medicine, urology, dentistry, critical care	Saudi Arabia	Cross-sectional national survey of faculty involved in VI during the 2020 Match cycle implemented by the Saudi Commission for Health Specialties (SCFHS).	To assess faculty members' satisfaction, acceptance and perception of the performance of the VI system used for SCFHS March 2020 Match cycle for applicant assessment	Faculty members given the option to use multiple different platforms. Most used only Zoom (66%); FaceTime with a little zoom (8%), and FaceTime only (1%) - chosen mostly by personal preference 23%, ease of use 34%, or colleague advice 33%.	Quantitative	Survey	After Match, before arrival in program	173 interviewers (RR 86%)	Satisfaction: Overall, had high satisfaction and would recommend its future use. Confidence: Most felt comfortable ranking candidates based on VIs. Fit: Most agreed VIs adequate for candidates to answer questions/ express themselves and allowed them to accurately form an impression about applicant personality. Strengths / Weaknesses: Organizers' communication was the most important enhancer, foll…	Satisfaction: Overall satisfaction for VIs was 4.16/5 (SD 0.89) and had high likelihood of recommending VIs to colleagues (8.37/10 SD 1.50). The majority (88.3%) felt VIs were extremely or very organized, 10.4% felt VIs only somewhat organized. The majority (86.7%) felt that VIs were the right duration. For stress level, 42.2% felt slightly stressed, 24.9% moderately stressed, 21.4% did not feel …	N/A	N/A	N/A	N/A	N/A	N/A	N/A	This study matched results from other studies: VI have high faculty satisfaction; VI should not completely replace IPIs. Study differed from others in that faculty agreed they could assess personality adequately via VI. Familiarity with technology decreased stress related to VI.	Areas of improvement include introducing virtual tours in training centers and didactic training courses highlighting each programs' strengths and weaknesses. Preparation and investment in digital technology, assuring equal affordability to all applicants, development of standard validated virtual assessment tools, and continuous feedback and assessment of its performance are warranted.	N/A	VIs are an established and acceptable tool for medical residency matching.	Future research should compare VIs and IPIs with comparison groups or case-control studies. There is need for ongoing improvement and assessment, namely internet connection and lack of pre-IV demonstration videos.	1	1.5	1.5	1	2	1	1	1
Allam et al.	The virtual interview experience: perspectives of pulmonary and critical care fellowship applicants	2022	fellowship	pulmonary critical care medicine	USA	An electronic survey was sent to applicants to pulmonary and critical care medicine programs asking them to compare their fellowship VI experience with their residency IPI experience.	To assess Pulmonary / Critical Care applicants' perceived ability to evaluate programs; To determine attitudes toward VI components; To identify applicants' preferences for future interview format.	Interview with PD, informal meetings with fellows, live presentation by PD, division leader interviews, conference access, prerecorded PD presentation, virtual hospital tours, video testimonials, virtual city tours, open house.	Quantitative	Survey	After Match, before arrival in program	289 applicants (RR 27%)	Fit: Most respondents believed that VIs hindered their ability to evaluate programs’ culture, faculty–fellow relationships, location, facilities, and fit, but believed they were able to evaluate the clinical experience, curriculum, and potential for academic development equally well as IP. Format: The most helpful elements of VIs were the interview with the PD, meetings with the fellows, and inte…	N/A	Fit: Most applicants believed VIs hindered their ability to evaluate a program’s facilities (94%), location (86%), culture (86%), faculty–fellow relationships (69%), and fit (61%) within the program. Most believed that they were able to evaluate "as well" virtually the clinical experience (64%), curriculum (76%), and the potential for research and academic development (76%). No program factor was…	N/A	The median number of programs applied to was 37, 35% applied to >50. Respondents participated in a median of 9 (IQR, 5–12) VIs. 32% estimated that they applied to more programs as a result of VI, and 30% believed they participated in more interviews.	N/A	N/A	N/A	N/A	Despite the financial and scheduling benefits, most respondents [91%] would want future interview formats that would include at least the option of an IPI or visit. About a third of applicants perceived they applied and interviewed with more programs as a result of VIs. The increasing ratio of application per position is increasing strain on PDs. VIs felt to be at least as effective as IP for eva…	VIs effective for evaluating some components of fit but not others. Open houses and tours may be more helpful if they were higher quality / of different formats than in the present study.	1) Convenience sample representing most but not all applicants; 2) Low response rate. 3) Results may not be generalizable to other specialties.	The COVID-19 pandemic ushered in a new era for program recruitment and has demonstrated many advantages of VIs (e.g., financial / time savings, reduced carbon footprint, potential to increase diversity.) Our study shows that most applicants prefer future interview formats to include both VIs and the option of IP visits or interviews. It also identifies the most and least helpful elements of VIs a…	Programs should consider focusing attention on most helpful elements of VIs. Discussion on how to reintroduce IP visits or interviews and challenges of maintaining equity if mixture of IP/VI applicants to same program, or if different between programs. In the future, uniformity in interview formats across programs will be needed. Might allow P visits after rank lists submitted by PDs and condense…	1	1.5	0.5	1	1	2	1	1
Anteby et al.	Challenges of virtual interviewing for surgical fellowships: a qualitative analysis of applicant experiences	2022	fellowship	Multiple Advanced Gastrointestinal / Minimally Invasive, Bariatric, Hepatopancreato-biliary and Surgical Oncology	USA	Semi-structured interviews of applicants from the 2020 fellowship match to surgical fellowship (advanced GI, bariatric, hepatobiliary). Thematic qualitative analysis rooted in grounded theory was conducted to understand perceived challenges of VIs.	To understand the unique challenges associated with the VI and develop a list of recommendations for future fellowship matches.	N/A	Qualitative	Interviews	After Match, before arrival in program	15 applicants	Satisfaction: Almost all reported strong satisfaction with the interview process and the results of their match, despite VI challenges. Fit: Perceived data deficiency and a loss of subjective "feel" for the program resulted in heavier reliance on available objective data / word of mouth. Applicants had difficulty distinguishing between institutions, and personal connections felt superficial. Form…	N/A	Perceived data deficiency: Participants consistently noted they could not thoroughly assess the atmosphere (loss of subjective feel for the program) resulting in a heavier reliance on objective data and individual experiences of those affiliated or familiar with the program. Loss of subjective feel for the program: As a result of not being IP, applicants noted an inability to get an "on the groun…	Participant recommendations to PDs and to future applicants (see lessons learned).	N/A	N/A	N/A	N/A	N/A	This study focused on challenges and recommendations for future fellowship VIs. Major disadvantages of the VI process included lack of knowledge about programs, increased dependence on published data / word of mouth, and magnification of unprofessionalism and poor organization. These findings lead to important recommendations: PDs need to provide more in-depth objective data (case logs, on-call r…	1) Create opportunities to observe team interactions (e.g. multi-faculty conversations, conferences), Send out list of prior fellows and offer an informal closed session with current fellows. 3) Provide access to objective program data (e.g., case logs, research publications / opportunities, weekly schedule, average call shifts and on-call coverage, email the intro presentation before interview d…	1) Despite purposive sampling, applicants from the south and west were under-represented and applicants from academic centers were over-represented. 2) Negative experience might have led to response bias / increased participation in the study. 3) Recall bias. 4) Data reflect perceptions of the first cohort and may no longer be reflective of the experience once applicants / interviewers gained dig…	Transitioning from IP to VIs resulted in a loss of access to traditional information streams. Virtual platform interactions disproportionately influenced applicants' final ranking decisions. Participants felt challenges could be mitigated with the provision of additional objective program metrics and triangulation of independent data.	PDs need to optimize the VI experience to incorporate the informal elements of the IP interview, namely communication with current fellows and other applicants. Need for long-term studies looking at the difference in match quality before and after the change in interview practice. It will be critical to evaluate satisfaction of virtually matched applicants long term, and compare to historical gro…									Y	N	N	Y	Y	Y	Y	Y	N	Y
Armstrong et al.	The influence of virtual interviews on the fellowship match in obstetrics and gynecology (OBGYN)	2021	fellowship	Multiple obstetrics & gynecology	USA	Survey of faculty and applicants to OB GYN fellowships to determine effectiveness of VIs.	To evaluate how a VI process influences the OB GYN fellowship match at a single institution.	N/A	Quantitative	Survey	Unclear, but before arrival in program	61 applicants (RR 46.6%), 43 faculty interviewers (RR 95.6%)	Fit: Majority of applicants and faculty felt VIs allowed them to accurately represent themselves, form connections, and determine if program/candidate were a good fit.	Fit: 83.7% of faculty agreed or strongly agreed that the VIs allowed them to accurately represent themselves, 83.7% reported VIs helped them decide if candidate was a good fit.	Fit: 88.6% (p=0.48 compared to faculty) of applicants agreed or strongly agreed that VIs allowed them to accurately represent themselves. 62.3% had a good understanding of the program’s culture after VIs. 67.2%, (p=0.98) reported that the VIs helped them decide if the program was a good fit.	N/A	N/A	N/A	N/A	N/A	N/A	VIs may be adopted long-term given advantages in cost to applicants and time burden to programs with IPIs. It will be important to optimize VIs so that applicants and programs feel confident that outcomes mirror IP match results.	N/A	N/A	Use of VIs should continue for fellowships, as well as other training pathways, including medical school and residency.	Should determine a standardized and evidence-based approach to VIs. Should investigate impact of VIs in residency and medical school selection.	1	0.5	0.5	1	0	2	1	1
Asaad et al.	The experience of virtual interviews in resident selection: a survey of program directors in surgery	2022	residency	multiple general surgery, neurosurgery, OB-GYN, ophthalmology, orthopedic surgery, otolaryngology, plastic surgery, thoracic surgery, and vascular surgery	USA	Cross-sectional survey of surgery PDs about the strengths, limitations, and overall utility of VIs.	To uncover program directors’ experiences across all surgical specialties concerning the pros and cons of VIs in applicant selection.	N/A	Quantitative	Survey	5 resident interviewers; 10 4th-year student interviewees (RR = 100%)	365 PDs (RR 26%)	Satisfaction: The majority of PDs were dissatisfied with VIs. Fit: Most felt VIs were inadequate to assess fit, personality, communication skills, commitment to the specialty & ability to function as a resident. Cost: Nearly all agreed costs were significantly reduced, though VIs were not necessarily less time consuming. Future: PDs prefer a hybrid option of VI and IP experiences in the future, t…	Cost: VIs were less expensive (Agree 98%; Neutral 2%; Disagree 0.3%); VIs were less time-consuming (Agree 34%; Neutral 23%; Disagree 43); VIs allowed for more candidates to be interviewed (Agree 36%; Neutral 29%; Disagree 35%); Fit VIs made it easier to assess fit with the program (Agree 1%; Neutral 23%; Disagree 75%); VIs made it easier to assess an applicant’s personality and communication skil…	N/A	Technical difficulties were rare. If you offered virtual social events before interviews, was an applicant’s attendance at such events considered while selecting an applicant to interview and rank? Yes 23.4%; No 54.3%; N/A 22.3%	N/A	N/A	N/A	Estimated reduction in interview-related expenses by employing a VI format: Median $ 3000 (IQR 1000-5000)	N/A	VIs presented several challenges. Interpersonal skills and interactions with faculty were top factors when ranking applicants after they receive an interview. These skills were harder to evaluate using a virtual format. VIs yielded equivocal results on whether they increased a program's interview capacity and future studies are needed to determine if they led to an expanded applicant pool. With c…	PDs felt it was more difficult to assess applicants’ fit compared to IPIs. Application control measures are needed if VIs continue.	1) Cross-sectional design. 2) Unable to determine if the program ultimately matched the best "fit" residents as this can only be determined over time (and will entail lengthy comparisons of matched and unmatched applicants). 3) Good "fit" was subjectively determined by respondents. 4) Limited response rate may not be representative of all programs. 5) Study limited to PD perspectives only.	Despite cost and time benefit, VIs present unique challenges in evaluating residency applicants, particularly to surgery and surgical specialties. A combination of both virtual and in person interviews will likely evolve as the future of the resident selection process in the upcoming application cycles.	Surgical disciplines may be less satisfied with VIs than other specialties. Future studies should assess whether VIs leads to an expanded applicant pool. Future options could include a dual interview format (VIs as screening for shortlisting IPIs). VIs could be exclusively offered to rotators and home applicants (given their existing month-long experience). VI option could be based on applicant c…	1	1.5	0.5	1	1	1	1	1
Asadourian et al.	Home field advantage: assessing the geographic trends of the plastic surgery residency match during the COVID-19 pandemic	2021	residency	plastic surgery	USA	Match analysis conducted by examining publicly available data for the 2015-20 and 2021 integrated plastic surgery residency match.	To analyze the geographic outcomes of the plastic surgery match during the pandemic and compare them with previous cycles.	N/A	Quantitative	Match analysis	After Match, before arrival in program	159 applicants (RR 82.3%) in 2021, 963 applicants (RR 95.1%) from 2015-20	Match outcomes changed, with home matches increasing. The trend was similar regardless of program size or region. The increase in home matches was significant for programs ranked outside the top 30 by Doximity rankings, but not for the top 30 programs. Excluding those who matched at their home program, rates of matching were similar in the same state and the same region.	N/A	N/A	N/A	N/A	N/A	More residents matched at their home program in 2021 than in 2015-20 (36.0 % vs. 24.1%, p = 0.01, OR: 1.78). There was no difference in the percentage of applicants matching in the same state as their medical school (33.6% vs. 26.9%, p = 0.114). More applicants matched in the same region (61.1% vs. 50.2%, p = 0.017, OR: 1.55), although this difference was not significant after excluding those who…	N/A	N/A	Opportunities to form personal connections / professional relationships between geographically distant students and programs were diminished by the absence of away rotations and Vis, and may have conferred advantage for medical students at their home program. Applicants may have ranked their home programs higher due to an inability to gauge "fit" at other programs. Highly regarded programs may re…	N/A	1) Data collected from program websites and social media accounts may be incomplete or inaccurate. 2) Assessment of regional bias in the match was based on arbitrary assignment of states using a Census map that may place geographically nearby locations in separate geographic regions. 3) Applicants without access to plastic surgery training in their affiliated hospital were allowed to complete awa…	In the absence of IP opportunities to form new professional relationships during the COVID-19 pandemic, residency programs matched applicants from affiliated medical schools at higher rates than previous years. Rates of matching students from affiliated medical schools at higher ranked programs appeared to be less affected, which may be due to the wider adoption of virtual alternatives to form re…	Match rates may continue to be skewed towards home matches if additional efforts aren't taken to allow for building personal relationships and exploration of fit. Research is needed to explore whether virtual webinars, sub-Is, etc. can aid in this process.	1	1.5	1.5	3	N/A	2	1	2
Bamba et al.	Virtual interviews for the independent plastic surgery match: A modern convenience or a modern misrepresentation?	2021	residency	plastic surgery	USA	Applicants to a single program in the independent plastic surgery match completed either IPIs (pre-pandemic restrictions) or VIs (post-pandemic restrictions) and were surveyed regarding their interview experience.	To assess if applicants prefer a VI to an IPI experience; To determine if VI applicants had a different opinion of a program compared to the IPI applicants.	IP: The interview included an informal social event with current residents the night before, followed by interviews with faculty and selected chief residents the following day. The day also included a presentation, lunch, and a tour. VI: Interviews were conducted on Zoom. The VI day included a general presentation, interviews, a virtual tour and a resident-only breakout room as replacement for th…	Quantitative	Survey	Before Match	18 applicants: 10 IPIs, 8 VIs (RR=60%)	Satisfaction: Applicants were satisfied overall with both IP and Vis, though VIs were rated slightly lower. Fit: Applicants didn't feel they got to know the faculty, residents or program as well virtually. Preference: Applicants had a strong preference for IPIs. Nearly half would favor a screening VI followed by an IPI. Cost: VIs are less expensive than IP. Match: Perception that VIs negatively i…	N/A	Satisfaction: How would you rate your overall interview experience? (IP 8.8; VI 7.5; p = 0.0314); Fit: How well did you feel you got to know the program? (IP 4.7; VI 3.25; p<0.0001); How well did you get to know the faculty (IP 4.3; VI 3.25; p = 0.0194) and the residents? (IP 4.3; VI 2.75; p<0.0001); Compared to interviews at other programs of the same type (i.e., other virtual or other IPIs), ho…	Not Described	N/A	N/A	N/A	The IPI group spent significantly more money on their interview at our program compared to the VI group ($587 vs $0, p <0.0001). The VI group spent less on their interviews despite going on more interviews ($3787.50 vs $5100.00, p = 0.056), but this was not statistically significant. The average cost per interview of any type was similar between the IP and VI groups ($271.35 vs $343.47, p = 0.129…	N/A	VIs are efficient from a time and cost perspective. Fellowship applicants (residents) may have more limited time than residency applicants (medical students). Time off for IPIs can pull students away from classroom and clinical rotation obligations, and residents away from other obligations, potentially impacting family, patients and colleagues. Medical students may have fewer financial resources…	VIs were efficient for applicants from a financial and time perspective. Virtual applicants felt they did not become as acquainted with a program as their IP counterparts. Most preferred IP and felt it offered a match advantage.	1) 60% response rate; 2) Those with more negative feelings may have been less likely to respond; 3) Respondents may have concealed true opinions in case it affected their match. 4) Small study size.	Our study demonstrated that the VI process was an efficient process for applicants from both a financial and time perspective. However, the VI left applicants less satisfied with their interview experience. The applicants felt they did not become as acquainted with the program as their IP counterparts. The VI process may play a large role in residency and fellowship applications in the future, an…	Need for further research into VI, e.g., explore role of VIs in streamlining the application process (e.g., as a screening tool or as a back up). At present, cannot recommended replacing IP with VIs. Improving the VI process and making it as similar to IP as possible. Surveying applicants on preferences and collaborating with PDs on how best to incorporate these preferences will be important.	2	0.5	1	1	0	2	1	1
Barnes et al.	Impact of virtual interviews on gastroenterology and hepatology fellowship recruitment	2021	fellowship	gastroenterology & hepatology	USA	Survey of all GI/Hepatology fellowship applicants to a single institution to assess the VI experience and the impact it had on the application process using closed and open ended questions.	To determine applicant perceptions of VI experiences and impact on application process.	Virtual social hour the night before the VI day.	Quantitative Qualitative	Survey	After Match, before arrival in program	14 applicants (RR 22%)	Satisfaction: All were satisfied with VIs. Fit: Impressions were mixed on the ability to understand culture, with comments highlighting that it's pretty easy to get a sense of definite "no"s, but harder to get a deeper sense of culture to allow differentiation of rank lists. Format: Most liked the virtual social hour. Future: All recommended Vis continue as an option in the future.	N/A	Satisfaction: 71% of applicants were satisfied with VIs, 29% very satisfied. Fit: Regarding ability of VI to understand culture, 21% felt somewhat, 36% felt a moderate amount, and 43% felt very much. 64% participated in formal interview preparation at their home institution. Format: 93% indicated that they were either “somewhat satisfied” or “extremely satisfied” with the virtual social hour the …	N/A	N/A	N/A	N/A	N/A	N/A	VIs will likely continue to be utilized in future application cycles.	N/A	N/A	This data may motivate other programs to consider their own assessments of both Vis and options to maintain applicant engagement in a virtual application cycle.	Satisfaction and Fit data is consistent with other studies, emphasizing the importance of finding other means to allow bi-directional assessments of fit, perhaps through IP second looks at a small number of programs.	1	0.5	0.5	1	0	1	1	1
Brueggeman et al.	Virtual interviews in the era of COVID-19: expectations and perceptions of orthopaedic surgery residency candidates and program directors	2021	residency	orthopedic surgery	USA	Cross-sectional survey of orthopedic surgery PDs and applicants about pre-VI and post-VI expectations and perception, as well as past IP experiences (PDs and reapplicants) on the relative importance of application components, ability to assess fit, interview costs, and preferred interview modality.	To determine whether candidates and PDs preferred a specific format for residency interviews; To explore pre–VI expectations and immediate post–VI perceptions of PD and candidate ability to assess fit; To assess PD and candidate perceptions of the importance of each component of the application package/process in virtual vs IP contexts.	N/A	Quantitative Qualitative	Survey	Unclear, but before arrival in program	29 PDs (RR 15%), 99 applicants (RR 20%)	Satisfaction: Most PDs and candidates were less satisfied with VIs. Cost: Vis were less expensive for both applicants and programs. Preference: Most PDs and candidates preferred IPIs despite the monetary savings. Fit: PDs were able to assess competitiveness, but less able to assess other aspects of fit, including social, clinical & surgical skills, and genuine interest. Candidates were able to as…	PDs placed greater importance on research (S = 67.5, p = 0.02) and less on the interview (S = –67.5, p = 0.02) in the virtual context vs IP. Fit: The ability to assess competitiveness was similar for IP experiences, pre–VI expectations, and post–VI observations (x2 = 1.08, p = 0.58). All remaining categories of ability to assess fit (e.g., social skills, surgical skills clinical skills, genuine i…	Compared with IP, candidates expected that in VIs, programs would place greater importance on research (S = 599.0, p = 0.02), transcripts (S = 595.5, p = 0.01), and LOR (S = 1,189.5, p < 0.01), while placing less emphasis on the VI itself (S = 21,191.0, p < 0.01). Candidate expectations of the IP context were broadly in line with PDs; however, candidates tended placed greater importance on resear…	97% of programs hosted fewer IP away rotations and only 31% hosted virtual away rotations. VIs resulted in 52% of PDs holding more interview days. 48% held the same number. 51% of applicants applied to the same # of programs; 48% applied to some/significantly more. Lack of travel influenced the choice to apply to more programs for 46%.	Selected comments showed concern that top candidates were able to have more interviews, with lower tier applicants having fewer opportunities; something must be done to prevent interview hoarding; if VIs persist an application / interview cap is critical.	N/A	N/A	Roughly half (55%) of PDs invested in new/updated technology to support VIs, but 83% reported spending less/significantly less money to support interviews compared with previous cycles (the same: 14% and more: 3%).	N/A	Results indicate cost savings, increased application burden, reduced abilities to assess candidate/program fit, and the importance of away rotations. VIs represent a promising avenue to reduce cost. Application inflation was exacerbated despite recommendations that applicants with > 235 or < 235 on Step 1 apply to no more than 40 or 60 programs, respectively, highlighting the need for caps on app…	Reduced ability to assess fit was a challenge for PDs and candidates. Interview inflation and the need to offer more interviews increased with VIs.	1) Response bias / low response rate. 2) The results do not offer specific suggestions for improving the process of future application cycles. 3) The ability of applications and programs to assess fit is error-prone and accuracy of fit perceptions can only be determined after several years of residency. 4) The findings should not be interpreted as post-hoc evaluations of candidate / program fit.	This study assessed the immediate expectations and perceptions of candidates and PDs regarding VIs in the 2020/2021 orthopedic surgery residency application cycle. PDs reported diminished ability to assess fit in the virtual context across most categories. Highlighting a large mismatch of perceptions, candidates tended to overvalue non interview portions of the application process relative to PDs…	It will be critical to correlate perceptions of fit after VIs with subsequent candidate / program experience after arrival (and several years) in the program.	1	1.5	0.5	1	0	2	1	1
Caldwell & Lawler	Orthopedic surgery residency application process in 2020 - Has diversity been affected?	2021	residency	orthopedic surgery	USA	Retrospective comparison of orthopedic surgery applicants in 2018 and 2020 examining the proportion of URiM applicants who met pre-screening criteria, were invited to interview, & completed interviews in a single program.	To evaluate the effect of virtual rotations and interviews on diversity by examining the demographic distribution (i.e., race, ethnicity, & gender) of applicants to an orthopedic residency.	N/A	Quantitative	Other	Unclear, but before arrival in program	433 applicants in 2020, 420 applicants in 2018	EDI: The rates of URiM status in the applicant pool, those invited for interviews, and those attending interviews were similar. The transition to virtual away rotations and VIs doesn't appear to present a barrier to diverse applicants, and does not clearly promote diversity in the interview pool either.	N/A	N/A	Diversity: Twice as many URiM applicants completed virtual rotations in 2020. There were no significant differences between the 2018 and 2020 application cohorts in terms of number or proportion of URiM applicants (p=0.7598) or female applicants that met initial screening criteria (p=0.3106); or URiM applicants (p=0.6647) or female applicants who were invited to interview (p=0.63). Overall, appli…	N/A	N/A	N/A	N/A	N/A	In a typical year, programs offer a set number of interviews. Students select interviews based on interest, location, expense, time away, & conflicting interview offers. Declined interviews are offered to others. The elimination of travel decreased the time to interview at a program. Applicants could interview consecutively @ geographically distant programs & even interview at more than one progr…	N/A	1) single institution study, 2) confounders such as institutional commitment to diversity that may not be representative of all programs, 3) relied on self-identification of URiM status, 4) retrospective analysis, and 5) did not include rank lists / match outcomes.	Data suggest VI and virtual away rotations had no major effect on the proportion of URiMs who applied, were invited to interview or completed the interview process @ a single institution. Doesn't appear to be a barrier or promotor of diversity.	Future research is needed to analyze impacts on rank lists and match outcomes for URiMs. The impact of over-accepting interviews, and how that restricts the total number of applicants offered interviews to a program needs to be explored, especially if this is resulting in a higher number of unmatched students or programs going deeper on their rank lists. Potential solutions include offering more …	1	0.5	1.5	3	N/A	1	1	2
Carpinito et al.	The virtual urology residency match process: Moving beyond the pandemic	2021	residency	urology	USA	Post-match survey of all applicants to a single urology program who completed VIs assessing pandemic-related changes, open houses and virtual socials, interviews, tours, and costs.	To define applicant response to the 2021 Urology residency match process during the COVID-19 pandemic and to extrapolate lessons to optimize urology resident selection after the pandemic.	N/A	Quantitative	Survey	After Match, before arrival in program	144 applicants (RR 36%)	Cost: Cost was reduced. Future: A plurality of applicants felt VIs should continue (nearly twice as many as those that stated they wanted to return to IP). Most favored IP second looks with some caveats (e.g., after PDs submitted rank lists, at a limited number of programs.) Nearly all felt interviews should be released on the same day.	N/A	Future: 56/144 (39%) thought interviews should remain virtual, 33/144 (23%) thought they should not, 44/144 (31%) were unsure. If VIs persist, 116/ 144 (81%) thought second looks should be allowed, but limited in number, and scheduled after PD rank list submission. Format: Pre-season open houses had small to no impact on rank lists (56%). Social or happy hours had a moderate to strong effect on r…	N/A	N/A	N/A	N/A	39/144 (27%) reported that they spent <=$1,000 on the interview process, including application costs, interview clothing, and lighting equipment. 54 out of 144 (38%) reported that they spent $1,001 - 2,000, 32/144 (22%) reported that they spent $2,001 — 3,000, 12 (8%) reported that they spent $3,001 4,000, 2/144 (1.5%) reported that they spent $4,001 5,000, and 5/144 (3.5%) reported that they spe…	N/A	A plurality of applicants favored VIs in the future, likely in part because 1:1 interviews appear to have been replicated faithfully, and cost / convenience improved (65% of applicants spent less than $2000, compared to $6,000-10,000 in prior years.) A high financial burden can condone unfair practices, as not all applicants have the financial resources to compete with others regarding the number…	More applicants thought interviews should stay virtual as opposed to return to IP. Authors proposed this may be because applicants felt interviews faithfully replicated the IP process, in addition to cost and convenience. However, most applicants thought facility tours, city tours, and resident interactions were not well reproduced virtually.	1) Cross-sectional design. 2) Subjective results. 3) Risk of recall bias. 4) Risk of confirmation bias. 5) Risk of selection bias. 6) Low response rate. 7) All applicants participated in VIs only, so no IPIs for comparison. 8) Did not ask how applicants felt VIs allowed them to represent themselves. 9) Did not ask interviewers about their ability to connect with applicants.	The most universally favored change to the 2020 application process was the release of interview invitations on the same day and this should remain in future years. A plurality of applicants favored VIs and several aspects such as faculty and resident interviews were felt to be faithfully reproduced on a virtual platform. Despite this, applicants felt deprived of important information best convey…	Need to standardize interview process to ensure programs compete fairly for applicants. Consider VIs followed by a designated period for optional second looks after programs have submitted rank lists. Consider a hybrid process with a virtual first round followed by a second, more selective IP round. Future research is needed on which VI features are most likely to result in a high ranking. Future…	1	0.5	0.5	1	0	1	1	1
Chang et al.	Virtual versus in-person surgical fellowship interviews and ranking variability: the COVID-19 experience	2021	fellowship	ophthalmology - glaucoma	USA	This study compared ranking of interviewers within the same virtual room and not within the same virtual room in 2020 to assess the effect on ranking variabilities. We also compared ranking categories (“accept,” “alternate,” and “pass”) agreements between 2018/2019 IPIs and 2020 VIs to assess the effect of VIs on ranking variabilities.	To investigate the effect of interview format changes necessitated by COVID-19 on candidate ranking variabilities.	2018/2019: One-to-one, applicant-to-faculty IP interviews. 2020: Multiple faculty members to one candidate via Zoom in one of two formats: "within the same virtual room" versus "not within the same virtual room".	Quantitative	Other	Before Match	11 interviewers	Ranking: Changing from IP to VI format did not increase interviewer ranking variability. Interviewers in the same virtual room had less ranking variability than interviewers not within the same virtual room.	Not within the same room and within the same room mean rankings differed by 1.33 (95% confidence interval difference 0.61 to 2.04, p = 0.0003), with within the same room interviewers having less variability than not within the same room pairs. The variability of IPIs and later VIs showed no differences (weighted Kappa statistic 0.086 for 2018, 0.158 for 2019, and 0.101 for 2020; p < 0.05 for all …	N/A	N/A	N/A	Not within the same room interviewers had significantly less agreement on "accept", "alternate" and "pass" categories than within the same room pairs. No significant ranking variabilities between interviewers IP pre-COVID vs VIs post-COVID. The overall least attractive candidate had the lowest interviewer ranking variability. The most attractive candidate had the second lowest interviewer ranking…	N/A	N/A	N/A	Changing from IP to VI produced less variability in candidate ranking amongst interviewers who shared the same virtual room. This may be due to reduced variety of questions, cognitive bias due to groupthink and herd effects that may allow the more influential member of the interview team to overshadow dissenting opinions. The candidates with the least variability were the least and most desired a…	Group interviews (multiple interviewers - one candidate) may provide candidates with fewer opportunities to represent themselves in the best light	1) One subspecialty in one institution; 2) Not possible to know if ranking variabilities would apply if interviewers occupied the same physical (as opposed to virtual) space; 3) No candidate data	A change from one-to-one interviews resulted in less candidate ranking variability between interviewers in the same virtual room - this may decrease candidates' opportunities to represent themselves fully. Changing from IP to VIs did not impact ranking variability among interviewers.	Group interviews may provide fewer opportunities for candidates to fully represent themselves. 1:1 VIs are preferred. Opinions with VI seem to converge at applicant extremes (i.e., absolutely rank vs do not rank), though the middle applicant pool has wider variability may require greater deliberation.	1	0.5	1.5	1	N/A	2	1	2
Chen et al.	A match made in cyberspace: applicant perspectives on virtual residency interviews	2022	residency	multiple	USA	Cross-sectional survey of applicants involved in VI during the 2020-21 Match cycle.	To examine how applicants in the 2020-21 Match viewed the VI experience across multiple specialties, including attitudes toward social media platforms, programming methods, program websites, access to resources, evaluation of fit, overall satisfaction, and future implications.	N/A	Quantitative Qualitative	Survey	After Match, before arrival in program	158 applicants (RR <5%)	Satisfaction: Most applicants were satisfied with VIs. Fit: assessing fit was challenging due to loss of casual IP interactions. It was hard for applicants to "be themselves" during VIs or to demonstrate genuine interest. Cost: Majority agreed that VIs increased financial access. Weaknesses: Most common concern among applicants is VIs allowed for hoarding. Ranking residency programs was challengi…	N/A	Preference: Most (68.8%) agreed that residency programs should continue to provide VIs as an option even when IPIs are an option. Strengths/Weaknesses: Most common concern (73.9%) is that VIs allowed for interview hoarding. 62.4% thought VIs made ranking difficult. 51.6% thought assessing programs was difficult. 48.7% felt virtual setting decreased ability to show interest. Fit: 51.6% thought lac…	The 5 themes from the qualitative analysis were: fit was difficult to determine due to a lack of IP interactions; reduced cost and travel logistics allowed people to accept more VIs; Interactions with residents and structure of interview day were most important in determining fit within the virtual setting; disparity in the amount of resources offered by medical schools to prepare for VIs; streng…	73.9 % applicants felt VI allowed students to "hoard" interviews. 56.9% disagree that applications to program should be limited. 62.7% agree that the number of interviews should be limited. 59.7% think a mechanism to indicate a genuine interest in a program such as a "token system" should be implemented.	Rank outcomes were not formally assessed, but survey revealed applicant concern that ranking residency programs was challenging, including that assessing programs was difficult due to lack of away rotations in person and difficulty assessing "fit" via VIs	N/A	98.1% agree that VI increases financial access to interviews	N/A	Medical students are satisfied with VIs and want them to continue even when in IPIs are possible. Applicants found Instagram and Twitter helpful. Websites were helpful, particularly those with information about the area. Info presented on interview day was most helpful, including presentations and formal interviews. Reduced costs of VIs were the biggest benefit, and most students felt they had th…	Applicants appreciated some social media platforms and all components of residency websites and day of programming, as well as the benefits of the reduced cost/travel, as it allowed them to participate in more interviews and interviews at different programs on the same day. Applicants had concerns about assessing fit and interview hoarding, and generally supported interview caps and preference si…	1) Response bias; 2) Small sample size	VIs should continue to be an option. Residencies can help applicants asses fit through use of social media, especially Twitter and Instagram. Medical schools should support applicants by providing access to electronic equipment for VIs. Interview caps (limits) and preference signaling systems should be implemented.	Residencies should utilize social media (Instagram and Twitter) to reach applicants, should highlight and expand upon website information, invest time in interview day programming, research the financial value and efficacy of VIs, and further evaluate usefulness of VI components. ERAS should work with specialty societies to evaluate interview caps and supplemental applications/signaling mechanism…	1	1.5	0.5	1	1	1	1	1
Clark et al.	Virtual interviews for sports medicine fellowship positions save time and money but don't replace in-person meetings	2022	fellowship	orthopedic surgery sports medicine	USA	Survey of PDs and applicants to orthopedic sports medicine fellowship programs regarding preferences for virtual vs IPIs.	To understand the perceptions of both PDs and applicants regarding the VI process for orthopedic surgery sports medicine fellowship programs. To determine if PDs and fellowship applicants would prefer IPIs despite the cost savings of VIs.	N/A	Quantitative	Survey, Cost analysis	After Match, before arrival in program	40 PDs (RR 47%), 72 applicants (RR 27%)	Format: Largely Zoom. Many programs offered more interviews, conducting more / day with less time dedicated to one. Fit: They found it difficult to make personal connections and missed the ability to tour / meet faculty. Cost to both programs and applicants was markedly reduced. Preferences: PDs and applicants strongly preferred IPIs. They believed choice between IP and VIs should be offered in t…	100% of PDs agreed/strongly agreed the interview carries significant weight in ranking. Preference: 77% preferred IPIs, whereas only 15% preferred VIs. 75% said it was important/ very important to interview IP. 85% thought it was important/ very important to meet faculty IP. 80% thought it was important/ very important that applicants tour institutions IPI 58% agreed/ strongly agreed conducting V…	68% said it was important/ very important to interview IP. Fit: 67% thought it was important/ very important to meet faculty IP. 67% thought it was important/very important that applicants tour the institutions IP. 43% agreed/ strongly agreed that VIs negatively affected personal connections. 29% agreed/ strongly agreed VIs will negatively affect their ability to match at their desired programs. …	55% of PDs thought the transition from IPIs to VIs was easy/ very easy. 84% used Zoom as their platform. 33% of PDs and 58% of applicants agreed/ strongly agreed that they were concerned about computer technical difficulties. 53% of programs had more interviewees per interview day, 20% (8 of 40) had less time per individual interview, 18% offered more interview dates, and 30% did not change their…	N/A	N/A	N/A	33% of PDs (13/40) saved between $1 and $2,500, 28% (11/40) between $2,501 and $5,000, and 20% (8/40) between $5,001 and $7,500. 17% of applicants (12/70) saved between $2,501 and $5,000, 27% (19/70) saved between $5,001 and $7,500, 26% (18 of 70) between $7,500 and $10,000, and 20% (14/70) more than $10,000.	N/A	The interview carries significant weight in ranking. PDs and applicants felt Vis negatively impacted personal connections. This may lead PDs to rely more heavily on letters of recommendation or personal phone calls. Without IPIs applicants may not get a sense of the program, the culture, resources and surrounding living area. Interestingly, PDs and applicants both supported choice of IP or VIs in…	N/A	1) Low response rate, 2) small sample size, 3) response bias (perceptions may have been based on match results), 4) survey followed only one application cycle of VI, 5) recall bias (completed post-match)	VIs allowed PDs and applicants to complete more interviews, but both stated that interviewing IP was important for applicants to meet faculty and tour the institution. Significant financial savings resulted due to the transition to VIs. Both PDs and applicants were in favor of the option of VIs, suggesting that VIs may continue to play a role in future application cycles.	The significant cost savings associated with Vis for both programs and applicants must be weighed against preferences for IPIs. The option of choosing virtual or IPIs was received favorably, however, PDs acknowledged this would bias their view of the applicants dedication / interest, causing learners to feel pressured about their "choice" and introducing equity issues. A VI followed by an IPI (i.…	1	1.5	0.5	1	0	1	1	1
D'Angelo AD et al.	Virtual interviews - Utilizing technological affordances as a predictor of applicant confidence	2021	fellowship	colorectal surgery	USA	Cross-sectional survey with closed and open ended questions sent to colon and rectal surgery fellowship applicants to examine if applicants who utilize the unique technology affordances of VIs will be more confident in their rank list, and to see if technological literacy influences applicant opinions of VIs.	To evaluate if colon and rectal surgery applicants apply to surgical fellowships differently than with IPIs; To determine resident satisfaction with VIs.	Zoom reported by 99%.	Quantitative Qualitative	Survey	Before Match	77 applicants (RR 54%)	Satisfaction: Applicants report high satisfaction with VIs but less comfort. Confidence: Overall, applicants felt confident that they ranked the program that was best for themselves, but were less confident they would match at their top ranked choice. Cost: Time and money were saved. Application inflation: applicants applied to more programs than they would have for IPIs. Strengths: cost savings.…	N/A	Satisfaction: Applicants were satisfied with VIs (4.3). Fit: VIs allowed applicants to decide if a program was the right fit (3.8); get to know the faculty (3.7), allowed development of rapport (3.7); allowed accurate representation of self (4.1). Strengths: Time and money saved were beneficial (4.8); VIs were more convenient (4.7). Weaknesses: Applicants reported less comfort (2.8). Difficult to…	Interruptions were not associated with confidence in ranking the best program highest (F(1,76) = .067, p = .796) or confidence in matching at a top ranked choice (F(1,76) = .082, p = .775). Technology for VIs was user friendly (M = 4.51/5, SD = .50), and applicants felt comfortable using the technology for virtual interviews (M = 4.68, SD = 4.71). 62% reported technical issues, but they were not …	Applicants applied to an average of 41.82 program (SD = 17.02) and received an average of 15.49 interview invitation (SD = 3.82) and attended 13.68 (SD = 6.54) interviews. 65% applied to the same number of programs and 34% applied to more due to VIs.	N/A	N/A	Applicants reported budgeting an average of $7432 for IP colorectal residency interviews prior to VIs being announced.	N/A	While the opinions offered by applicants regarding the VI process were mixed, there were concrete findings that offer a number of novel contributions regarding support for future VIs, impact of technological affordances on applicant confidence, and convenience of VIs. 73% wanted to continue VIs post - COVID - a noteworthy majority, given that other studies have found much less enthusiasm for cont…	N/A	1) Response rate was slightly over 50%, thereby limiting the generalizability of the results. 2) Response bias. 3) No collection of precise demographic data.	The goal of the fellowship match process is to find the best fit between applicants and programs. Despite the move to VIs, applicants were generally confident that they ranked the program that is best for themselves the highest. This indicates that VIs can still provide applicants with the required information needed to make an informed decision. VIs can significantly reduce the financial and tim…	As VI research continues to emerge across residency and fellowship specialties, PDs will need to collectively make important decisions about how to conduct interviews going forward. Sliding back into traditional IPIs may not be the right thing to do, given that the majority prefer VIs, even if COVID-19 was not a factor. Future studies should be designed to determine if applicant perception is con…	1	0.5	1	1	1	2	1	1
D'Angelo JD et al.	Program director opinions of virtual interviews: Whatever makes my partners happy	2021	fellowship	colorectal surgery	USA	Cross-sectional survey using closed and open ended questions sent to the PDs of all programs participating in the 2021 colon and rectal surgery fellowship application process. The study examined how PDs conducted VIs; if any of these conduct decisions were associated with differences in PD satisfaction with the resulting match; and PD’s opinions of how interviews should be conducted in the future.	To assess the processes and outcomes of the 2021 colon and rectal surgery match season.	75% used Zoom, but programs also used WebEx, Microsoft Teams, Vidrecruiter, and Bluejeans. 88% provided applicants info prior to the VI, but the type of info varied among programs (hospital / institution, salary & benefits, faculty bios and contact info, vacation and travel policy, living in the city (schools, housing, daycare), resident bios and contact info). All programs reported providing app…	Quantitative Qualitative	Survey	After Match, before arrival in program	41 PDs (RR 70%)	Satisfaction: Applicants report high satisfaction with VIs but less comfort. Confidence: Overall, applicants felt confident that they ranked the program that was best for themselves, but were less confident they would match at their top ranked choice. Cost: Time and money were saved. Application inflation: applicants applied to more programs than they would have for IPIs. Strengths: cost savings.…	Satisfaction: PDs were very satisfied with their match results this year (4.7). PDs noted VIs were more convenient (4.5) and they allowed them to ask all the questions of applicants they wanted (4.5). Fit: However, there was less satisfaction with the ability for PDs to accurately represent the program (3.40) and develop rapport (3.50). Future: 55% of PDs agree or strongly agree that next year’s …	N/A	N/A	Majority of programs interviewed an equal (60%) or greater (30%) number of applicants compared to IPIs the prior year.	N/A	N/A	N/A	N/A	Consistent with prior work on VIs, opinion was split in our study as PDs noted the perks of the virtual format while lamenting the loss of IP feel in rapport and program representation. Three novel findings of this study include: (1) PDs report high satisfaction with the outcome of VIs and their matched candidates, (2) VIs progressed smoothly for nearly all programs, (3) while PDs are split nearl…	Snapshot of satisfaction. No valuable lessons learnt	1) Data from 1 program in single specialty limits generalizability; 2) Recognition that interviewing for a one-year fellowship is different to interviewing for a place at medical school: 3) No match data reported, particularly how far down programs went on their rank lists.	A slight majority of PDs would advocate for VIs in the future if COVID-19 were not a factor, but the loss of IP contact is also lamented. This may serve as evidence for future decisions regarding VIs, which would save applicants time and money, both of which are scarce resources for trainees. It will be important for PDs within each specialty to come together to make plans for the future as appli…	Need to study match data (i.e. how many open positions, how far down the match list programs go when matching, and the effect of VI on the SOAP). Vis appear to be a viable option for the future, individually or as part of a hybrid option.	1	0.5	1	1	0	2	1	1
Day et al.	Virtual interviews for surgical training program applicants during COVID-19: Lessons learned and recommendations	2020	fellowship	complex general surgical oncology	USA	Rapidly (in < 1 week) converted to VIs for general surgical oncology fellowships at a single institution. Surveyed applicants and interviewers about the experience.	To share lessons learned and recommendations for conducting VIs for surgical trainee applicants.	The night before, a 2 hr virtual event was held (with the PD and fellows together on site in a conference room). This included an icebreaker, PD presentation, fellow presentations on research, professional development & living in the area, a tour, and Q & A. The interview day followed the general structure of IPIs (on WebEx). 1 or 2 interviewers (on site, together) interacted with a remote applic…	Quantitative	Survey	Unclear, but before arrival in program	24 applicants, 20 interviewers	Satisfaction: Overall experience of Vis for interviewers and applicants was excellent. Future: All applicants preferred IPIs, though several stated they would have no preference if given a choice.	On a Likert scale of [0 (poor)–10 (excellent)] current fellows who participated in the preinterview activities gave a mean overall rating of 8.33 range (7–10). Satisfaction: For the interviews, interviewers gave a mean overall experience rating of 8.3 (range 7–9). Current fellows felt the length and number of interviews were ‘‘just right’’.	On a Likert scale of [0 (poor)–10 (excellent)] applicants gave preinterview activities a mean rating of 8.86 (range 6–10). Satisfaction: For the interviews, applicants gave a mean overall rating of 9.2 (range 6–10). All applicants felt the length and number of interviews were ‘‘just right’’. Future: No applicant preferred VIs to IPIs, but several stated they would not have a preference if given a…	N/A	N/A	N/A	N/A	N/A	N/A	Based on experience, key recommendations were developed for the preinterview, interviews and post-interview communication (see lessons learned).	Preinterview: Involve stakeholders in conversations early regarding logistics; Select web-based teleconference software based on IT experience; Communicate with applicants early about VI timing and requirements; Perform simulated VIs to test all AV equipment and software; Provide written program information to applicants before VIs. Interview: Minimize the number of applicant invites to VIs (i.e.…	None described	It is important to involve program stakeholders in the design and implementation of VIs. Careful attention to the challenges and opportunities of VIs, including those in the technology, process flow, interviewer and team safety, communication, interpersonal, and social domains, can result in rapid implementation of a successful VI experience.	Satisfaction with VIs doesn't translate into desire for future VIs. Consideration of how to build in an option for VIs that maintains equity will be important.	1	0.5	0.5	1	0	0	0	1
DeAtkine et al.	Interviewing otolaryngology applicants in a virtual setting: A perspective after 2020 to 2021 match	2021	residency	otolaryngology	USA	Literature review and cross-sectional survey of otolaryngology PDs asking their perceptions about VIs.	To evaluate the quality of VIs and their utility for future residency application cycles.	N/A	Quantitative	Survey	After Match, before arrival in program	18 PDs (RR 14.5%)	Fit: PDs views on their ability to evaluate applicants was mixed (1/3 positive, 1/3 neutral, 1/3 negative), and most believed they couldn't fully showcase their program. Format: virtual open houses, Q & A sessions will persists even if IPIs resume.	Fit: Most (78%) believed applicants were not fully experiencing their residency program through VIs. A third (33%) believed VIs limited their program’s ability to evaluate applicants, 33% were unsure and 33% did not consider VIs a limitation. Format: To supplement limited IP interactions, 94.4% offered virtual opportunities outside of interviews including open houses and Q&A sessions. Half (50%) …	N/A	N/A	N/A	N/A	N/A	N/A	N/A	Prior research of otolaryngology PDs suggested VIs would be insufficient in providing a comprehensive assessment of candidates. IP is favored over virtual despite distance and travel expenses. Applicants felt less confidence in matching and more limited with VIs. One large multi-disciplinary research brief by the NRMP suggested VIs did not significantly affect the application process or interview…	Not Described	1) Low response rate; 2) risk of non-response bias.	Both our survey data and literature review suggest that Otolaryngology applicants and PDs feel this virtual format is not an ideal surrogate to evaluate applicants, despite the recent decisions of other specialties to continue strictly VIs.	Need to better understand PD and applicant perspectives with a larger sample and better response rate.	1	1.5	0.5	1	0	0	0	1
DiGiusto et al.	The impact of the COVID-19 pandemic on the 2020 pediatric anesthesiology fellowship application cycle: A survey of applicants	2021	fellowship	anesthesiology	USA	Survey of pediatric anesthesiology fellowship applicants regarding the VI experience using closed and open ended questions, to explore if applicants were able to present themselves and evaluate fellowship programs virtually, as well as to examine preferences.	To obtain input from applicants to help guide program decisions about “best practice” for the future for both pediatric anesthesiology and other graduate medical education matches.	N/A	Quantitative Qualitative	Survey	After Match, before arrival in program	50 applicants (RR 30%)	Fit: VIs are equal or better at assessing salary / benefits, academic, clinical and mentorship opportunities, clinical schedule, and work-life balance. However, VIs were worse for assessing goodness of fit, personalities of faculty / PD / fellows, culture of program / institution / region. Cost: Applicants reported lower costs with VIs. Preference / Future: Responses were normally distributed con…	N/A	Fit: A majority felt VIs conveyed the following equal or better than IPIs: salary and benefits (92%), academic (84%) and clinical opportunities (81%), schedules (81%), mentorship opportunities (70%), clinical experience and training (67%), and work-life balance (58.1%). The majority felt the following were conveyed slightly worse or much worse: characteristics/ personality of the PD (54%), charac…	Platforms preferred were Zoom, WebEx and Microsoft Teams. Before or during their interview, 98% were provided time to ask ?s about the program, 96% 1:1 time with the PD, 94% time to speak with current fellows, 90% time to speak to faculty, 84% presentation / program overviews, 84% 1:1 time with the APD, and 74% electronic documents with a program overview. Only ~ 1/2 of programs provided a live v…	Although applicants did not apply to more programs when they learned interviews would be virtual, they did attend more interviews than they would have IP.	N/A	N/A	All reported saving money, range $3000 - 5000 (31%), $7000 - 10000 (12%).	N/A	Key findings include importance of providing an electronic “packet of information” prior to VIs, providing dedicated time for applicants to interact with current fellows, providing applicants with background information about the geographic location of the program, and offering a completely optional/obligation-free IP visit, when possible. Importantly, study results indicate that when feasible to…	N/A	1) Low response rate. 2) Response bias. 3) Recall bias post-match, which may have skewed results depending on an individual respondent's satisfaction with the results.	These results allow recommendations for “best practices” for VIs to include programs providing an electronic packet of information prior to the interview day, providing dedicated time for applicants to interact with current fellows, providing applicants an understanding of the city/region of the location of the program, and offering a completely optional post interview visit, when possible. Based…	It will be interesting to explore if responses change over time as people gain familiarity with VIs. It is critical to examine if concerns about "fit" play out after residents / fellows arrive in their new programs or if their fears are unfounded.	1	1.5	0.5	1	1	1	1	1
Ding et al.	Obstetrics and gynecology resident perception of virtual fellowship interviews	2022	fellowship	Multiple obstetrics and gynecology subspecialties	USA and Canada	OB GYN residents applying into subspecialty fields were surveyed using closed and open ended questions to determine effectiveness of VIs in creating rank lists, perceptions of programs based on pre-review materials provided, self-perception of performance in VIs, preferences on VI implementation, confidence with decision-making in rank-list creation, and overall perceptions of VIs	To assess OB GYN resident strategies in fellowship application, perception of the strengths and limitations of virtual fellowship interviews, and overall confidence with decision-making in creating their rank list	N/A	Quantitative Qualitative	Survey	Before and after Match	75 applicants (RR 15%)	Format: Zoom, 1:1 preferred to group interviews, 20 minutes in length. Fit: Some components of fit could be assessed well with VI, but it was difficult to get a sense of program culture. Cost: Applicants spent less on VIs and took less days off. Confidence: Majority feel less confident about programs / culture to inform rank list decisions. Preference: More applicants would prefer VIs to IP if ha…	N/A	Fit: Applicants agreed or strongly agreed they were able to convey a sense of their personality (85%). Confidence: Compared to IP, applicants felt less / somewhat less confident making an informed rank list (60%) and less / somewhat less confident understanding culture (79%). Future: 13% prefer IP, 40% prefer VIs, and 47% hybrid. Strengths / Weaknesses: The greatest benefit of VI was reduced trav…	Items were rated as very helpful (program video, program reputation, personalized interview schedule, interview day program overview, interviews, and Q&A session with fellows; somewhat helpful (pre-review materials, brochure, website, video/ virtual tour “social” or “happy hour”; or neutral (program social media). All participants preferred Zoom and preferred 1:1 to a panel of interviewers. Most …	Most respondents applied to the same number of programs (76%), and most interviewed at more programs than they would have for IPIs (65%), citing both minimal additional cost and anticipation of a more difficult year matching as reasons for doing so. (49% interviewed at 11-20 programs, 24% interviewed at 21-30 programs.)	N/A	N/A	Cost savings: <$500 (8%), $500 to $1000 (3%), $1000 to $3000 (21%, $3000 to $5000 (20%.), $5000 to $7000 (16%), greater than $7000 (32%). Number of coverage days: 1-5 (43%), 6-10 (37), 11-15 (16%), 16-20 (4%). Difference if attended in person: would have needed more days covered (96%). Used vacation days: (100%).	N/A	VIs increased accessibility, and while applicants reported they didn't apply to more programs, they interviewed at more places. Applicants were less confident in their decisions regarding creating a rank list, despite interviewing at more programs. An inability to get a true feel for each program was the biggest limitation of the VI process, with programs blending into each other and losing indiv…		1) Unable to compare groups in real time (i.e. the comparison to IPIs was hypothetical); 2) Difficulty reaching all applicants; 3) Low response rate; 4) Non-response bias / representativeness of the data.	Some components of virtual residency and fellowship interviews are here to stay and it is of utmost importance to investigate the pitfalls of these changes. VIs resulted in more interviews per resident but less confidence in rank list creation. Cost effective but more difficult to determine culture of programs and get a true "feel" for them.	Further study dedicated to creating and implementing best practices for VI components and consideration of a hybrid interview model combining virtual and subsequent in person events are essential next steps	1	1.5	0.5	1	1	2	1	1
Ederle et al.	The impact of COVID-19 on the dermatology match: an increase in the number of students matching at home programs	2021	residency	dermatology	USA	Match analysis conducted by examining publicly available data for the 2017-21 dermatology residency matches.	To explore the impact of the COVID-19 pandemic on the number of students matching at home programs and the associated changes in regionality of the NRMP match process.	N/A	Quantitative	Match analysis	After Match, before arrival in program	2093 applicants (RR 82%)	Match outcomes changed, with home matches increasing significantly. The number of applicants matching in the same region was not significantly different.	N/A	N/A	N/A	N/A	N/A	The number of students matching at their home program varied by year (p = 0.3488), but the effect wasn't significant prior to 2021 (p = 0.0006). In 2021 there was an increase in the number of students who matched at their home program (p < 0.0001). In 2017-20, 24% matched at their home program vs 33% in 2021. There were no significant changes in regionality of the match. From 2017-20, 58% of appl…	N/A	N/A	Changes in away rotations and VIs limited program and applicants ability to assess each other. In the context of this more limited face-to-face time programs were more likely to match internal candidates.	N/A	None described	The COVID-19 pandemic impacted the dermatology match process, increasing the number of home matches in 2021.	Need to determine if home match rate remains skewed in future dermatology application cycles.	1	1.5	1.5	3	N/A	2	1	2
Egan et al.	Effect of COVID-19 restrictions on 2021 integrated plastic surgery match outcomes	2022	residency	plastic surgery	USA	Match analysis conducted by examining publicly available data for the 2021 integrated plastic surgery match compared to "historical controls" (years not specified, though appear to be pre-2016).	To explore the impact of the COVID-19 pandemic on the number of students matching at home programs or in geographic proximity by region in the match.	N/A	Quantitative	Match analysis	After Match, before arrival in program	181 applicants (RR 97%)	Match outcomes changed, with home matches increasing significantly. Applicants without a home program were less likely to successfully match. The number of applicants matching in the same region was not significantly different except in the South. Match rates for applicants from Top 40 schools increased, and match rates for applicants from lower tier schools decreased.	N/A	N/A	N/A	N/A	N/A	44 applicants (24.3%) matched at their home program. The majority of successfully matched candidates came from medical schools with home programs (135, 76.7%), while 38 (21.0%) came from programs without a home program. Medical students from Top 40 schools were more likely to match at their home program (p <0.001). The majority of applicants from Top 40 schools matched at Top 40 programs (62%, 62…	N/A	N/A	More applicants matched at home programs in 2021, likely as a direct result of cancellation of away rotations and VIs. Although some medical students from schools without home programs may have completed an IP sub-I, a significant and concerning decrease in match rates for students without a home program was still seen. These changes can impact the institutional diversity of programs. The cost sa…	N/A	1) accuracy of data on social media, 2) unable to assess individual effects of IP (for students without a home program) or virtual sub-Is (open to all students), 3) comparison to older historical controls	Trends in 2021 match data showed decreasing match rates 1) for students without a home program, and 2) for students not from a Top 40 medical school. The trends are concerning for institutional diversity of programs. In an increasingly competitive field, the planned 2022 elimination of Step 1 will likely place even greater importance on interpersonal interactions and institutional pedigree. Altho…	Further analysis of match outcomes once Step 1 scoring changes will be important. The significant cost-savings of VIs and virtual away rotations must be weighed in the balance with impacts on home match rates, institutional diversity of programs, and the risk of further marginalizing lower performing students and those from non Top 40 schools.	1	1.5	1.5	3	N/A	2	1	2
Elmorsi et al.	How real is a virtual interview? Perspectives of orthopaedic surgery residency directors	2021	residency	orthopedic surgery	USA	Cross-sectional survey of orthopedic surgery PDs about perception of Vis.	To assess the pros, cons, and robustness of VIs compared to their antecedent IP format from the perspectives of PDs.	N/A	Quantitative	Survey	Before Match	47 PDs (RR 28.3%)	Satisfaction: The majority of PDs felt IPIs were better. Fit: It was more difficult to assess fit, commitment to the specialty, ability to function as a resident, personality, and communication skills virtually. Cost: Each program saw a ~$3000 reduction in cost, but this may not be large enough to be meaningful. Preference / Future: The majority favor a hybrid format with a sizeable minority pref…	Satisfaction: VIs were overall better than IPIs (8 Agree, 8 Neutral, 31 Disagree); VIs made the selection committee rely more heavily on objective metrics (30 Agree, 9 Neutral, 8 Disagree); Fit VIs made it easier to assess an applicant's commitment to the specialty and their ability to function as a resident physician (2 Agree, 15 Neutral, 30 Disagree); VIs made it easier to assess an applicant's…	N/A	VIs allowed more candidates to be interviewed (15 Agree, 11 Neutral, 21 Disagree); VIs were less time-consuming (18 Agree, 12 Neutral, 17 Disagree); What % of VIs were impacted by technical difficulties (Median 9% (IQR 0-10)); Was an applicant’s attendance at social events considered when selecting an applicant to interview and rank? Yes 11 (23.4%), No 22 (46.8%), N/A 14 (29.8%).	N/A	N/A	N/A	VIs were less expensive (46 Agree, 1 Neutral, 0 Disagree). The estimated reduction in interview-related expenses was $3000 (IQR $1000-5000).	N/A	PDs in orthopedics were less satisfied with VIs in this study, which is in contrast to several other studies which showed greater satisfaction among both applicants and PDs. VIs saved an average of $3000 per program, but this isn't significant to most programs. The time spent organizing and executing VIs was similar to IPIs (though this may become streamlined with experience.) VIs may cause dispr…	Assessing fit was challenging. There were no time efficiencies perceived by PDs. Strategies to smooth out the process include conducting mock interviews and setting a standard operating procedure.	1) Cross-sectional; 2) Unable to assess temporal changes in PD perspectives; 3) Survey does not reflect impact of NRMP match results; 4) Low response rate.	VIs have been an overall success, making most PDs opt for dual interview formats in future cycles. How this technology is further implemented in the future remains to be seen.	PDs may opt for dual virtual / IP formats in the future. Future research should see if an increased familiarity with the VI format improves the daunting process of resident selection. VIs may lead to increased importance of applicants’ USMLE scores, letters of recommendation, and research productivity.	1	1.5	0.5	1	1	1	1	1
Estevez et al.	Structuring the future residency recruitment seasons: Applicants' perspective on the virtual experience during the 2020-2021 interview season	2022	residency	psychiatry	USA	Cross-sectional online post-interview survey to all applicants that interviewed at a single psychiatry residency program.	To assess applicants perspectives on the benefits, limitations, and areas of improvement for VIs, specifically on the top 3 factors that are considered by applicants when ranking a program	N/A	Quantitative	Survey	Before Match	56 applicants (RR 33%)	Satisfaction/Confidence: Although most applicants preferred IP or a combination of IP and VIs, the majority believed that they could make a solid decision with ranking. Preference: Roughly 1/3rd prefer IP only; almost half prefer a hybrid. Fit: Applicants had mixed responses regarding whether they could get assess "fit", highlighting limitations of VIs for showcasing program culture. Slightly mor…	N/A	Satisfaction/Confidence: The majority (84%) felt they could make a solid decision when ranking based on VIs. Preference: 35.1% stated future preference for IPIs, 43.9% for a combination of IP and VI. Fit: Responses on whether applicants could get a sense of program culture were mixed, ranging from positive (perfect 9%, well 23%, negative 26.3%, not at all 3.5%). 58% reported their personality was…	Most influential part of interview: meeting PD 82% and engaging with residents in a social setting 71%.	N/A	N/A	N/A	Cost not formally evaluated, but 64% reported being able to apply to more programs because of VIs reducing geographic and economic barriers.	N/A	Key factors in ranking a program including fit, interview experience and desired geographic location - these can be addressed with VI. VIs are more limited in showcasing program culture. Social interactions with program leadership and residents were the most influential components of interview day. Respondents could apply to more programs because of VIs reducing geographic and economic barriers, …	Programs should not disregard the meaningfulness of social interactions with peers and leaders as they make ranking decisions. Residency programs should be cautious to limit bias.	1) Small sample size, 2) single institution and single specialty limiting generalizabiity,3) timing prior to rank introducing bias	With further refinements to the VI process, bias can be reduced and an equitable experience that allows both parties to make informed decisions can be achieved.	Programs should collect data on their recruitment experience to develop evidence-based guidelines for future reference. Residency programs should consider unconscious bias in structuring future recruitment seasons.	1	0.5	0.5	1	0	1	1	1
Faletsky et al. A	Disparate responses in match outcome across competitive surgical subspecialties to pandemic era constraints: An analysis of impacts of minimal auditions	2022	residency	plastic surgery, otolaryngology (ENT), neurosurgery, urology	USA	Match analysis conducted by examining publicly available data for the 2019-20 and 2021 residency matches in plastic surgery, ENT, neurosurgery and urology. Only examined programs in the top 50th %tile according to Doximity rankings. For non-home matched applicants, previous contact (i.e. visiting sub-I, research year, or virtual sub-I) was analyzed.	To examine the impact of Covid-19 on the 2021 “home match” pattern for plastic surgery, ENT, neurosurgery and urology; To uncover whether applicants in the 2020-21 match were more likely to match at their home programs where IP relationships and assessments were preserved.	N/A	Quantitative	Match analysis	After Match, before arrival in program	120 plastic surgery applicants, 240 ENT, 143 neurosurgery, 223 urology in 2021; 116, 243, 154, 222 respectively in 2020; 116, 239, 153, 220 respectively in 2019.	Match outcomes changed with home matches increasing in plastic surgery and ENT, but not in urology and neurosurgery (highlighting that the impact is not uniform across specialties). Prior communication (IP and virtual sub-Is and research) declined, yet the impact wasn't uniform across specialties. Emphasis on Sub-Is in future years of VIs may impact equity.	N/A	N/A	N/A	N/A	N/A	Increases in home match rates were observed for plastic surgery and ENT in 2021. 12% and 17% of plastic surgery applicants matched at their home program in 2018-19 and 19-20, compared to 25% during 2020-21 (p = 0.0345). 23% and 22% of ENT applicants matched at their home program in the 2018-19 and 2019-20, compared to 31% during 2020-21 (p = 0.0482). Neurosurgery and urology applicants did not de…	N/A	N/A	COVID restrictions on IP sub-Is and interviews resulted in variable effects on home match rates across competitive surgical subspecialties. Communication (virtual and IP Sub-Is & research) likely decreased across all specialties (assuming neurosurgery followed a similar trend), though parallel increases in home matches were seen in only 2/4 specialties, suggesting the issue is multi-factorial. Ea…	N/A	1) accuracy of public data, 2) information concerning applicant prior contact was dependent on public data and not confirmed, 3) the analysis focused on only the top 50 %tile rather than all programs, 4) top programs may be more competitive and more impacted	VIs and the cancellation of Sub-Is impacted programs differently. Home match rates increased in plastic surgery and ENT, but not in neurosurgery or urology. Familiarity with applicants after a sub-I is an important factor in candidate selection. Without visiting sub-Is, programs were more likely to select applicants with whom they were previously acquainted. Higher numbers of IMGs and non-senior …	Match rates may continue to be skewed towards home matches if efforts to make personal connections and allow for IP assessments aren't enhanced. For applicants: completing away rotations or research can be critically important for IP familiarity, particularly if VIs persist. This can have impacts on equity (due to cost in terms of time and money). For programs, they must carefully consider the po…	1	1.5	0.5	3	N/A	2	1	2
Faletsky et al. B	The impact of COVID-19 on plastic surgery home program match rates	2022	residency	plastic surgery	USA	Match analysis conducted examining publicly available data for the 2019-20 and 2021 residency match in integrated plastic surgery. Only examined programs in the top 50th %tile according to Doximity rankings. Previous contact was analyzed and a sub analysis conducted by reputation tier.	To examine the impact of COVID-19 on the 2021 plastic surgery match, to determine if programs resort more to their home medical school applicants with whom they are more familiar.	N/A	Quantitative	Match analysis	After Match, before arrival in program	133 applicants in 2021, 129 in 2020, 128 in 2019.	Match outcomes changed with home matches increasing in plastic surgery. Prior communication (in-person or virtual Sub-Is, research) between individuals who did not match at their home program and the program they matched in decreased in 2021. To compensate for the loss of IP exposure, applicants and programs tend to turn to their home institution.	N/A	N/A	N/A	N/A	N/A	In 2019 and 2020, 15 (12%) and 22 (17%) plastic surgery applicants matched at their home program, respectively. In 2021, 32 (24%) applicants matched at their home program (P = 0.032). When stratified further according to program rank, home program match rates for Top 25 programs in 2021 had a large increase over the 2020 match cycle (28% in 2021 vs 17% in 2020), whereas the home match rates of pr…	N/A	N/A	COVID-19 restrictions on IP sub-Is and interviews resulted in increased home match rates in plastic surgery. Insight into intelligence, dexterity, spatial sense, knowledge base, good judgement, and proficient technical ability are difficult to assess virtually. Programs and applicants clung to perceived invaluable subjective measures where they could still find it - their home institutions. The m…	N/A	1) accuracy of public data, 2) information concerning applicant prior contact was dependent on public data and not confirmed, 3) validity of Doximity rankings (only source of such longitudinal rankings), 4) the analysis focused on only the top 50 %tile rather than all programs (done because effect may have "washed out" towards the bottom)	The suspension of visiting sub-Is for the 2020–21 match placed limits on programs' ability to analyze applicants subjectively. Applicants' appraisal of programs could only be nominally addressed by virtual program rotations. As a result, plastic surgery programs were found to have matched a significantly greater proportion of applicants at their home program during the 2020–21 cycle. The importan…	Match rates may continue to be skewed towards home matches if additional efforts aren't taken to allow for building personal relationships and exploration of fit. It will be interesting to see what happens in the 2021-22 match wherein restrictions on visiting Sub-Is were partially lifted as it is difficult to sort the effects of VIs from virtual sub-Is.	1	1.5	0.5	3	N/A	2	1	2
Frohna et al.	National pediatric experience with virtual interviews: lessons learned and future recommendations	2021	residency	pediatrics	USA	2 cross-sectional surveys: one of pediatrics residency program directors/program coordinators and one of applicants regarding the 2020-21 interview season with both open and closed ended questions.	To compare 2020-21 VI to 2019-20 IPIs.	Recommendations for VIs encouraged programs to showcase programs virtually (websites, videos, brochures etc.), discouraged IPIs, and advised offer daytime components of interview day on a single day to facilitate scheduling	Quantitative Qualitative	Survey	Before Match	97 PDs, 265 applicants	Preference: A majority of PDs preferred VI only if applicants had extenuating circumstances; A very small % preferred all IP; applicants preferred a hybrid model with IP visits for tours and meetings with residents/ faculty. Fit: applicants noted an inability to assess fit. Strengths / Weaknesses: PDs reported an initial increase in workload to prepare, but season went better than expected. VIs s…	Satisfaction: Programs reported an initial increase in workload, but that VI season went better than expected. Preference: 58% preferred VIs only if an applicant had extenuating circumstances. Only 2% expressed a preference for IP for all applicants. Strengths/Weaknesses: Benefits: VIs save time and anticipated continued time savings if VI continue, reported greater equity, cost savings for both …	Satisfaction: Hybrid model rated significantly higher than IP or only virtual (hybrid 78.5%, IP 56.0%, virtual 50.6% (P< .0001 for both comparisons). Strengths/Weaknesses: Advantages: significant savings in cost/time, less fatigue, less scheduling difficulty, more even playing field. Disadvantages: inability to thoroughly get to know program/place/culture, fatigue from VIs, concern that programs …	N/A	N/A	N/A	N/A	Cost outcomes not formally assessed, but both PD and applicant survey showed perceived reduced costs as an advantage.	N/A	Based on the data, the recruitment action teams recommended proceeding with VIs for 2021-22 due to continued uncertainty related to COVID-19, with re-evaluation thereafter. IPIs are associated with several costs including financial, time away from clinical rotations, high carbon footprint. VI challenges include a decreased ability to assess fit, and potential for increase numbers of applications …	VIs save time and cost for both programs and applicants. Reduced in person interaction was a downside for both programs and applicants. Student-led grassroots organizations can be a valuable tool for enhancing communication from national organizations.	N/A	The VI process worked well overall, with applicants and programs saving both time and money and programs maintaining a high rate of filling their positions. The benefit of reduced financial costs and increased applicant equity of VIs outweigh the downsides of not having program leaders and applicants meet IP.	Future research should assess impact of not having applicants and programs meet IP - if rate of changing programs will increase, if programs can improve ability to glean necessary information to mitigate mismatches, if programs can create virtual events that better showcase program culture, the impact of VIs on trainee geographic distribution, if there are ways to improve equity, decrease bias, l…	1	1.5	0.5	1	0	1	1	1
Gabrielson et al.	The COVID-19 residency application cycle did not affect geographic dispersal patterns among applicants entering the urology match: A quantitative mapping study	2021	residency	urology	USA	Match analysis conducted examining publicly available data for the 2016-20 and 2021 urology match. Variables included home state, undergraduate institution, medical school and residency. Latitudes / longitudes used to assess geographic dispersal patterns. Sub analyses looked at influence of USNWR ranking and Niche city rankings ("best places for young professionals").	To provide a comprehensive geographical analysis of all applicants entering the urology match during the COVID-19 application cycle (2021) and those matching in the 5 prior application cycles (2016-20).	N/A	Quantitative	Match analysis	After Match, before arrival in program	294-356 applicants (RR 99-100%) each year	Match outcomes were unchanged for urology in 2021 compared to 5 prior application cycles. Geographic dispersal was stable. No significant differences were found in median distance between medical school, undergraduate university, or home state and residency. No significant difference in home matches, matching from medical schools without a home urology program, matching from schools with historic…	N/A	N/A	N/A	N/A	N/A	There were no significant differences in the median distance between medical school, undergraduate university or home state and residency when comparing the COVID-19 cycle to 5 prior application cycles. There was no significant difference in home matches (19% vs 15%, P = .08) or the proportion of applicants matching at their home institution, from medical schools without home urology programs, fr…	N/A	N/A	The hypothesis that VIs and lack of IP Sub-Is would increase home match rates was found to be inaccurate in urology. No significant differences in geographic dispersal were identified. Applicants from small or nonexistent programs fared similarly to prior years. These findings were surprising and may dispel the dogmatic thinking regarding alterations in geographic distributions in the urology mat…	N/A	1) accuracy / completeness of public data, 2) rankings of residency programs by applicants and vice versa was unknown, 3) comparisons between desired vs actual migration distances couldn't be examined, 4) only the distance of the most direct path between endpoints was measured and may not reflect true travel time.	COVID-19 restrictions on IPIs and away rotations did not significantly alter urology residency match patterns or hamper an applicant's ability to match at programs outside their geographic region.	The match was largely unchanged and programs and medical students can feel more confident in VIs. Virtual or "hybrid" interviews in the future may save time, money and enhance equity. A hybrid proposal was made to balance cost-savings while providing an opportunity for IP interaction. Once VIs are complete, programs lock in and submit their rank lists. Then applicants may travel for "first looks"…	1	1.5	1.5	3	N/A	2	1	2
Gaigbe-Togbe et al.	Virtual interviews during COVID-19 pandemic: A survey of applicants to fellowships in female pelvic medicine and reconstructive surgery	2021	fellowship	female pelvic medicine and reconstructive surgery	USA	Cross-sectional survey of applicants to female pelvic medicine and reconstructive surgery fellowships concerning their satisfaction with VIs, their comfort and preparedness to rank fellowship programs based on the VI, their ability to obtain necessary information needed about the programs, the costs incurred, and the number of shifts missed as a result of interviews.	To assess female pelvic medicine and reconstructive surgery (FPMRS) fellowship applicants’ perspectives on the effectiveness of the VI format for creating rank lists, and cost / time savings compared with IPIs.	N/A	Quantitative Qualitative	Survey	Before Match	42 applicants (RR 56.7%)	Satisfaction: Most applicants were satisfied with VIs. Confidence: Most felt comfortable ranking the programs. Fit: Most were able to obtain information needed about the programs and formed adequate impressions of programs. Strengths: reduced cost, decreased time away from clinical duties, efficient, convenient, can interview at more programs, flexible scheduling, less stressful. Weaknesses: loss…	N/A	Satisfaction: 92.8% were somewhat satisfied or very satisfied with VIs. Confidence 83.3% felt comfortable and prepared for ranking the programs. Fit: Most respondents felt that they were able to obtain information needed about the programs (97.6%) and felt that they were able to form an adequate impression of the programs, the programs’ faculty, and current fellows (68.3%, 82.9%, 85%, respectivel…	N/A	A significant proportion of applicants would have applied to more programs or locations if they had known that interviews would be conducted virtually (34.1% and 36.6%).	N/A	N/A	Majority of applicants (97.5%) spent less than $2,000 during the application process. 87.8% anticipated spending greater than $4,000 and 19.5% anticipated spending greater than $10,000, if the cycle had remained IP. 17.1% had planned to take a loan or obtain a new credit card to cover interview expenses. A majority (85.4%) reported they had anticipated spending >10 shifts away if interviews were …	N/A	Experience of these applicants is unique because they planned and accepted interviews based on presumption interviews would be IP. Applicants were satisfied and felt they had adequate information to create their rank order lists. Most found VIs equally informative / helpful and less stressful than traditional IPIs. Although previous studies showed some applicants preferred IPIs, applicants in thi…	None described	1) non-validated questionnaire; 2) small sample size; 3) low response rate; 4) response bias - candidates accepted interviews based on the presumption that the interviews would be held in-person.	Process of VIs was satisfactory and provided necessary information to create rank lists. The overall positive experience was related to decreased stress, lower cost and time saved. VIs leveled the playing field for lower SES applicants who had considered fellowship but were deterred due to the financial burden.	Further studies in larger cohorts across a breadth of medical specialties are needed. VIs may introduce equity back into the Match process and warrant continued use.	1	0.5	1	1	0	1	1	1
Gallo et al.	Virtual residency interviews reduce cost and carbon emissions	2021	residency	urology	USA	Surveyed urology applicants for information about their travel, costs, and satisfaction with VIs during the 2021 application cycle	To critically examine the consequences of requiring applicants to travel during the urology match process. To calculate the carbon offset and cost savings resulting from the VI format in 2021.	N/A	Quantitative	Carbon footprint analysis, Cost analysis, Survey	After Match, before arrival in program	73 applicants (RR 14%)	Satisfaction Applicants were largely satisfied with VIs. Carbon Footprint: Carbon emissions were reduced. Costs: Applicant costs were reduced.	N/A	Future: 72% of applicants responded they would be very likely (45%) or somewhat likely (27%) to recommend VIs in the future. Only 15% of applicants were very unlikely to recommend VIs.	N/A	N/A	N/A	N/A	Average cost of ERAS applications $1,693 per applicant, $133 per interview. Estimated cost savings on transportation were $2,198 (range $0 - $5,384, SD $1,385) per applicant and $173 per interview, totaling $1.06 million for the applicant pool.	Estimated carbon offset was 6.26 metric tons per applicant (range 0-17.72, SD 4.09). 0.49 tons of CO2 was saved per interview. Extended to all applicants 3,011 metric tons of CO2 emissions were saved.	VIs cost applicants less and lowers CO2 emissions. The 3,011 tons of CO2 emissions saved is equivalent to the emissions of 182 typical Americans in 1 year or emissions from 685 passenger vehicles driven for 1 year. It would take 3,689 acres of forest to sequester these emissions over 1 year. Reducing travel during the match is a tangible way to reduce the carbon footprint of our field. Applicants…	N/A	1) low response rate (14%), 2) emissions estimates are limited by assumptions made regarding travel (assumed applicants traveled between major cities, which may underestimate both cost and emissions, assumed all intraregional travel completed by car, assumed each interview a separate travel event), 3) considered only the carbon footprint of applicant travel, not faculty transport, catering and ot…	Converting interviews to virtual reduces the carbon footprint and offers substantial cost savings for applicants. The combination of a positive environmental impact, cost savings, and applicant satisfaction with Vis show Vis may be reasonable to continue in the future.	Further analysis and feedback from programs and applicants needed to appreciate the true impact of VIs.	1	1.5	0.5	3	0	1	1	1
Geary et al.	Perspectives on virtual interviews-A follow-up study of the comprehensive endocrine surgery fellowship interview process	2022	fellowship	comprehensive endocrine surgery	USA	Cross-sectional survey with closed and open ended questions administered to comprehensive endocrine surgery fellowship PDs and applicants. Results were compared with previous studies exploring IPIs.	To characterize the goals, burdens and opinions of Comprehensive Endocrine Surgery Fellowship applicants and PDs after the transition to virtual formats and to compare findings with previously reported data regarding pre-COVID IPIs.	Fewer PDs (22%) hosted social events as they felt they didn't add value (though applicants that attended positively reviewed the experience). 50% altered the interview-day structure (shorter interviews, reduced time between interviews, limiting information presented during day, no tour).	Quantitative Qualitative	Survey	After Match, before arrival in program	22 applicants (RR 60%), 18 PDs (RR 82%)	Fit: perceptions of PDs and applicants on ability to assess fit were mixed. Cost: costs were reduced. Strengths: reduced cost and more time efficient; ability to make favorable impressions; assessments not compromised. Weaknesses: fewer social interactions; technological issues; ability to get protected time and space to attend; lack of a standardized approach. Future: More PDs than applicants pr…	Fit: Free text comments varied concerning ability to assess fit. Some felt personalities came through well, that feel and rapport were better than expected, seeing backgrounds led to interesting conversations and helped get a better sense of the applicant in their own environment. Others felt it was harder to get to know them as well and assess fit. They missed out on intangibles learned during c…	Fit: VI did not compromise ability to make a good impression and get an impression of attending surgeons. Weaknesses of VIs included: technological issues, difficulty arranging protected time, difficulty finding appropriate locations, lack of in-person interactions, noise / interruptions and time zone difficulties. Future: 23 % of applicants prefer to return to IPI, 27% prefer VIs, 5% prefer a ch…	N/A	40% of PDs invited more applicants to interview. The reduced costs of hosting and anticipated increases in applications were driving factors. 56% reported increased interview attendance. VIs allowed applicants to interview at more places and not cancel invites. Applicants spent fewer days away from clinical duties and used fewer vacation days (p = 0.01). Compared to historical data, there were no…	Comparing IP with VIs, there was no difference in percentage of applicants who had a clear first choice before interviews or who changed their first choice during the ranking process.	N/A	Reduced cost was the greatest benefit of VIs. For IPIs candidates reported spending $2,500 - 7,500. For VIs, candidates reported spending $0-500.	N/A	VIs are increasingly being perceived as effective in accomplishing the goals of mutual assessment and making good impressions whilst eliminating burdens of IP interviews, including time away from work and expense. The substantial cost savings must be considered in light of burgeoning debt and tightening departmental budgets. The increased flexibility, reduced disruptions to clinical responsibilit…	Technical issues and time zone concerns can be ameliorated with appropriate planning. There is discordance among PDs and applicants regarding the utility of virtual social events, and PDs should consider incorporating a dedicated, less structured, interactive session providing candidates with access to current or recent fellows.	1) small sample size; 2) data collected before matching - not possible to know if the "right" candidate matched with the "right" program	Vis were perceived to be effective compared to IPIs at achieving stakeholder goals. Applicants and PDs express interest in virtual/hybrid interviews in the future. With significant reductions in time away from residency and reductions in travel expenses, innovative strategies that include the use of VIs could be used in ways that optimize effectiveness, do not create redundancies, and promote equ…	Future studies should explore satisfaction of PDs and applicants following matching with Vis, particularly after they have arrived at and participated in their program for some time. Hybrid models are interesting considerations for PDs and applicants, though models of screening with VIs followed by IPIs lose many of the values associated with VIs.	1	1.5	1	1	1	2	1	1
Gordon et al.	How did coronavirus-19 impact the expenses for medical students applying to an orthopaedic surgery residency in 2020 to 2021?	2022	residency	orthopedic surgery	USA	Compared student reports of expenses for the 2020 (pre-COVID) and 2021 (post-COVID) match cycles in orthopedics.	To explore the financial savings associated with VIs for orthopedics by comparing the 2020 and 2021 match cycles. To examine if medical school geographic region was associated with differences in cost savings when applying to residency.	N/A	Quantitative	Cost analysis	After Match, before arrival in program	263 applicants in 2020, and 258 applicants in 2021 (RR 29%)	Costs: VIs save applicants money. Western region applicants save the most.	N/A	N/A	N/A	N/A	N/A	N/A	For all applicants, the median total expenses ($7250 versus $2250), application costs ($2250 versus $1750), away rotation expenses ($2750 versus $250), and interview expenses ($2250 versus $75) declined in 2021 compared with 2020 (all p < 0.001). The median total savings in expenses for all applicants in 2021 compared with 2020 was $5000. In 2021, median total expenses were lower in all geographi…	N/A	Median total expenses, application costs, away rotation expenses and interview expenses all declined in 2021 compared with 2020. Orthopedic applicants saved a median of $5,000. Applicants from the West benefited most (median savings of $6,000). The benefits of cost-savings are obvious. The potential harms need further exploration (e.g., possibility of increase in number of programs applicants app…	N/A	1) Expense data are limited to median and %tile distributions of application costs, away rotation expenses, interview expenses, and total expenses, 2) response bias (couldn't compare survey responders and non-responders; applicants who fared better may have been more likely to respond), 3) recall bias (survey administered after match), 4) expenditures were not correlated with match success or app…	VIs and cancelled away rotations offer significant cost savings to orthopedic residency applicants. Further studies are needed to evaluate the long-term success of the 2021 match. A better understanding of how these differences in expenses affect the ability to attract diverse applicants is important and there is a need to further explore perceived and actual financial barriers. Avenues to reduce…	Cost savings of VIs and limited away rotations are significant and may enhance diversity. Future efforts should work to limit costs. E.g., regional pods of interviews may limit back and forth travel.	1	1.5	0.5	3	N/A	2	1	1
Gore et al.	Applicant perceptions of virtual interviews for society of urologic oncology fellowships during the COVID-19 pandemic	2021	fellowship	urologic oncology	USA	Survey of applicants to 4 urologic oncology fellowship programs using closed and open ended questions focused on the constructs of faculty and fellow interactions, degree of information transfer related to the clinical and research programs, perception of the program culture, and preferences around virtual vs IP formats.	To understand applicant perspectives and preferences related to VIs and whether programs should consider VIs in the future.	N/A	Quantitative Qualitative	Survey	Before Match	58 applicants (RR unknown)	Satisfaction: Applicants were overall satisfied with the various components of the interview day. Preference: About 2/3rds of applicants would prefer VIs. Strengths / Weaknesses: lower cost, less time away from clinical responsibilities, and allowed interviews at more programs; unable to visit the hospital and surrounding city, unable to observe interactions between faculty and fellows and to obs…	N/A	Satisfaction: (1=strongly disagree, 5=strongly agree) applicant satisfaction with the following VI constructs: faculty Interactions 4.6; fellow interactions 4.4; fellowship culture 4.3; fellowship presentation overview 4.4; clinical program 4.3; research opportunities 4.5; didactic program 4.1; fellowship questions 4.7; adequacy of virtual format 3.5. Preference: 63% of applicants prefer VIs. Str…	N/A	N/A	N/A	N/A	N/A	N/A	VIs were largely successful. Cost savings were significant. The reduced time away from clinical duties is also important, especially because senior year is a critical developmental period for surgical skills and judgment Enthusiasm for VIs was tempered somewhat by the inability to fully assess location, interactions, and culture. The results support previous studies emphasizing both the importanc…	N/A	1) Possibility for overlapping survey respondents; 2) Timing of the survey was early in the pandemic and may change as experience with VIs increase; 3) PD and faculty perceptions of Vis were not assessed.	These survey results provide valuable insights that inform fellowship interview planning in a post-COVID educational environment. VIs offer important benefits to applicants given the typically burdensome expense associated with interviewing. Yet some applicants would prefer a return to IPIs when feasible. In the future, fellowship programs may consider hybrid interview processes that allow for vi…	VI processes must consider how to incorporate informal interactions and virtual social events to support a greater exposure to program culture.	1	1.5	0.5	1	0	1	1	1
Gorgy et al.	Comparison of cost changes due to the COVID-19 pandemic for dermatology residency applications in the USA	2022	residency	dermatology	USA	Performed cost estimation for applying to dermatology residency pre-pandemic (2016-20) and post-pandemic (2021). Also surveyed PDs.	To examine if COVID 19 reduced the cost of dermatology residency application due to VIs and reduced away rotations; To compare the effect of VI and IPIs.	N/A	Quantitative	Cost analysis, Survey	After Match, before arrival in program	619 applicants in 2016, 651 in 2017, 651 in 2018, 701 in 2019, 797 in 2020, 734 in 2021; 27 PDs	Satisfaction: PDs were satisfied with Vis, though they felt IPIs better achieved holistic review and allowed more realistic impressions of the program. Costs: VIs and no away rotations saved applicants money. Application inflation: The applications submitted per applicant and the number of interviews accepted stayed the same. Future: Majority willing to participate in future VIs.	Future: 70% of PDs were very or extremely willing to participate in future VIs. Satisfaction: 86% stated they were very to extremely satisfied. Fit: 52% agreed that IPIs were better to achieve a more holistic view of the applicant. 81% agreed that IPIs allowed for more realistic impressions of the program.	N/A	Mean applications submitted per applicant and number of interviews accepted per applicant stayed the same.	N/A	N/A	N/A	The average application cost for dermatology residency pre-COVID was $8476 per applicant. With COVID-19 restrictions, the average application cost was $1759 per applicant. The transition to VIs saved each applicant $6882.	N/A	VIs and not attending away rotations saves applicants $6882. While these savings are substantial, the importance of IP away rotations remain critical for residency placement. If away rotations return to IP and interviews remain virtual, the estimated application cost would be $4154 (including one away rotation), saving applicants $4322.	N/A	none	VIs and cancelled away rotations offer significant cost savings to dermatology residency applicants. However, there are limitations of Vis. It could be beneficial to have the option of Vis to alleviate cost burden and decrease financial barriers in the application process in the future.	Future efforts should work to limit the cost burden of residency application for medical students.	1	1.5	0.5	1	0	1	1	1
Grova et al.	Direct comparison of in-person versus virtual interviews for complex general surgical oncology fellowship in the COVID-19 era	2021	fellowship	complex general surgical oncology	USA	A questionnaire containing open and closed ended questions was administered to two groups of complex general surgery fellowship applicants - one group who undertook IPIs before COVID travel restrictions and another group who undertook VIs after travel restrictions.	To compare the effectiveness of VI with the traditional IPI format using two groups of applicants from the same interview cycle; To explore how the VI experience compared with the IPI experience regarding the ability to convey a feel of the culture of the program, and to determine if sufficient information was communicated during the interview process for applicants to make informed ranking decis…	All applicants joined Zoom call. PD gave an initial informational session. Candidates moved into assigned individual VI rooms. Interviews lasted 20-22 mins. In between each interview, candidates were moved back into a shared virtual room with faculty for 3-5 min breaks. Process repeated for entire day. If a candidate did not have an interview, they joined a shared virtual room with current fellow…	Quantitative Qualitative	Survey	Before Match	23 applicants (RR 88%)	Format: VI format called out as unique in providing the opportunity for applicants to observe faculty-faculty interactions via a shared break room with applicants. Applicants wanted more dedicated time with fellows. Satisfaction: Most were satisfied regardless of IP vs VI format. Fit: Majority of IP and VI applicants agreed that they were able to accurately represent themselves & gain a satisfact…	N/A	Satisfaction: 96% agreed that the interview met their expectations and that the interview gave them a satisfactory understanding of the fellowship, regardless of interview format. Fit: The majority in both groups agreed that they were able to accurately represent themselves to the program during the interview (92% vs. 82%). When asked if the interview experience helped them decide if our program …	Format: Applicants specifically mentioned that the VI format allowed them to see interactions between faculty as well as between faculty and fellows. One candidate stated that our VI configuration with all faculty members together between sessions was the only VI they had experienced that allowed them to see faculty–faculty interactions. Other suggestions from the VI-day applicants included more …	N/A	N/A	N/A	N/A	N/A	This study highlights the need to continue to improve the VI experience to ensure a comparable experience to IPIs. Although VIs provided candidates with satisfactory understanding of the fellowship and the ability to represent themselves, they did not allow applicants to adequately experience the culture of the program or glean enough information to make an informed ranking decision. Candidates e…	The responses from our VI applicants suggest that by creating a virtual group space to reconvene throughout the VI day, they were able to see interactions between both the faculty and the fellows. This is encouraging as we may be able to continue to improve the format as technology improves, to allow for even more interaction. To address the recurring theme of the inability to obtain detailed kno…	1) Single institution; 2) Small sample size limits power; 3) recall bias	VI can offer cost, time and travel savings. Significant improvements need to be made to ensure that applicants can gain a feel of the culture of a program.	Focused interventions can improve applicant appreciation of program culture and confidence in making ranking decisions. An example highlighted in this study is an interview format wherein faculty and applicants are together during beaks to allow for observation of faculty-faculty interactions. This study also emphasized the need for well-designed virtual tours. Future research is needed to see if…	2	0.5	1.5	1	0	2	1	1
Gupta et al.	Is the changing landscape of fellowship recruitment during COVID-19 here to stay?	2021	fellowship	pediatric surgery	USA	A cross-sectional survey with closed and open ended questions was sent to PDs of a pediatric surgery fellowship to understand the challenges and overall experience of the VI process, to provide insights into the process (logistics, advantages, disadvantages) and to determine how to utilize VIs in the future. At most programs IPIs were underway when VIs were mandated.	To analyze the VI experience and assess opportunities to improve the post-pandemic fellowship recruitment process.	Zoom was most used (75%) and preferred. VIs were 1:1 for 79% of programs, or one applicant to 2-3 faculty for 38% of programs. 21% provided a video tour and electronic packet with program information. 75% offered separate 1:1 sessions with current fellows.	Quantitative Qualitative	Survey	Unclear, but before arrival in program	55 PDs (RR 95%) 26 applicants (37%)	Satisfaction: PDs were moderately satisfied with VIs in a season where they also experienced IPIs. Strengths: cost, less time away from clinical or familial duties and ability to showcase self at home. Weaknesses: difficult to observe interactions, assess culture, fit / feel. Future: PDs preferred screening with VIs, whereas applicants preferred IPIs. Neither group was in favor of VIs in the futu…	Satisfaction: 66% of PDs were satisfied with the overall experience and felt that the virtual format did not interfere with the applicant's position on the rank list (86%) and overall success in the match (65%). Strengths: cost and time savings; Weaknesses: inability to get to know applicants as well or observe them interacting with others, limiting ability to assess "chemistry, personal rapport,…	Strengths: less time away from family and clinical duties, lower cost, opportunity to show personality if interviewed at home (showing decorations, etc.). Weaknesses: Decreased interactions with current fellows, difficulty getting a good feel of the program and determining if it was the right fit. Difficult to immerse themselves without the conflict of clinical duties. Hard to observe interaction…	93% of PD felt the lack of a recruitment event the night before the interview day affected the applicants experience.	Applicants continue to apply to a large number of fellowship programs and attempt to maximize their number of interviews in order to optimize their chances in a competitive match.	N/A	N/A	N/A	N/A	Vis became a reality overnight for many. With such little time to prepare for VIs programs may not have been able to provide the best virtual experience. The foremost advantage of Vis is saving time and money. The major disadvantages were an inability to assess intangibles such as the culture of the program and the hospital. VIs could be used as a potential screening tool followed by on-site inte…	N/A	1) Retrospective nature and inherent recall bias; 2) Did not discuss how the concerns of seeing the hospital and facilities in-person, or meeting the faculty and fellows IP could have impacted the rank list for both parties.	"Never let a good crisis go to waste". While VIs may not be able to completely replace IPIs, they may be a useful screening tool before more selective interviewing.	Virtual interviews could be used as a potential screening tool followed by IPIs. After matched applicants have started their fellowships, it will be important to determine how successful each side was at assessing "fit" virtually, to enable better determination of the ultimate impact of virtual vs. IPIs.	1	0.5	0.5	1	0	1	1	1
Hamade et al.	Virtual gastroenterology fellowship recruitment during COVID-19 and its implications for the future	2021	fellowship	gastroenterology	USA	Cross-sectional nationwide survey of PDs and applicants to evaluate experience and opinions on VI.	To identify the attitudes and perceptions of gastroenterology fellowship PDs and applicants regarding the VI experience and the role of VIs in the future.	One-on-one interviews were the most commonly used format (74%). Most programs used Zoom as their interview platform (67%).	Quantitative	Survey	Before and after Match	60 PDs (RR 29.7%), 126 applicants (RR 14.2%)	Satisfaction: ~ 40% of both PDs and applicants found VIs to be subopbtimal. Preference / Future: Neither applicants nor PDs felt VIs could fully replace IPIs, though a hybrid may be possible. Fit: Difficulty adequately assessing applicants and programs. Strengths and Weaknesses: Savings for programs and applicants, convenience, ability to conduct interviews from home / after hours, less stress, a…	Top three strengths of VI reported by PDs were conservation of funds for the institution (83.3%), accommodation of applicants (83.3%), and ability to conduct interviews after hours or from home (66.7%). The most common weaknesses were inability to give a tour of the institution (97.6%), inability of applicants to explore the city (90.5%), inability to make a personal connection with the applicant…	Most applicants had previous virtual experiences (71%). Strengths of VI were the cost savings (100.0%), the ability to apply to more programs (65%) and interview at more programs due to less time off needed (91%) or less interview date conflicts, (76.7%), and reduced interview stress (62%). Weaknesses of VI were the inability to visit and learn about the city where the program is located (96%), i…	N/A	Applicants: The average number of programs that each applicant applied to was 74.4 (SD 48.6). The average number of interviews offered was 14.2 (SD 6.9) and interviews attended 11.6 (SD 4.1). PDs: There was a difference in number of applications received, with more programs receiving 400+ applications in 2021 vs 2020 (p<0.0001). No difference between the average # of interviews offered (p=0.901),…	N/A	The proportion of matched internal applicants in each program was not significantly different between the 2020 (40.1%, SD 24.9) and 2021 (36.2%, SD 24.8).	N/A	N/A	Prior studies have shown mixed results on VIs. In this study, applicants and PDs agreed on the advantages of VI (decreased cost, convenient scheduling) and disadvantages (barriers to social interactions between applicants and interviewers, inability to physically tour the facilities /city). Most reported that they felt the role for VI in the future should be supplemental to IPIs. Interestingly, w…	Despite most programs reporting that they had expanded their online and social media presence by creating videos of their facilities to enhance the applicants’ exposure to the program, applicants still felt the inability to physical tour and get a feel for the culture was problematic. It's unclear if higher quality tours may address this. Have trouble shooting options for technology ready ahead o…	1) PDs were largely from academic medical centers. 2) Selection bias, with demographics not entirely representative of US GI programs. 3) Low response rate.	PDs and applicants report mixed views with regard to VI but anticipate that VIs may continue to have a future role. VI may augment future recruitment cycles with care taken to not disadvantage applicants, who rely heavily on the interview process to create personal connections with programs.	Further research exploring specific techniques utilized on interview day will be meaningful in understanding the actual VI setup.	1	1.5	0.5	1	1	2	1	1
Han et al.	The virtual recruitment onion: peeling back the layers of the interview season during the COVID-era	2022	residency	surgery	USA	Cross-sectional survey of general surgery PDs about how the COVID-19 mandated changes to the recruitment and interview processes impacted how PDs evaluated and recruited applicants.	To investigate surgery PDs perspectives on how COVID-19 mandated changes to the interview process and distanced recruitment strategies impacted evaluation of applicants; To identify any novel or updated recruitment strategies that can be incorporated into future practice.	N/A	Quantitative	Survey	Before Match	47 PDs (RR 16.8%)	Fit: Interviews were given less weight for assessing fit, however they remained the 2nd most important component for surgical PDs in the application process.	PDs rated Interview day impression and LORs as the 2 most important factors in the application process for both IP and VIs, however, interviews were given significantly less weight (p<0.001) and LORs greater weight (p=0.02) during the VI season. Away rotations were the top recruitment activity pre-pandemic, whereas program websites were considered most important during the pandemic.	N/A	N/A	N/A	N/A	N/A	N/A	N/A	Prior literature suggests fellowship PDs generally agreed with the statement that VIs allowed for accurate representation of the candidates. In the past, PDs have relied on other factors from the interview day such as how applicants interact with program administrators and current residents, and how they conducted themselves with other applicants to determine character attributes that can be chal…	PDs placed less value on their VI day impression of the applicants when determining an applicant’s commitment to surgery during the VIs compared to IP interviews. With decreased emphasis on interview day impressions, our study suggests that PDs may choose to rely on other variables such as LORs and USMLE scores as well as non-applicant factors such as reputation of medical schools during the VI c…	1) Small sample size. 2) Low response rate. 3) Disproportionately large representation of academic programs. 4) Potential for timing effect and recall bias.	A complete replacement of IP interviews with VIs may be challenging unless there is buy-in from the key stakeholders in the surgical community. Our study highlights PDs’ hesitation in assessing candidates’ commitment to surgery from VIs alone. Incorporating VIs as a part of the screening process for applicants may serve as an avenue to maximize the benefits of the VI format.	Long-term follow up studies of residents who matched during this application cycle are needed to see if perceptions / concerns about fit during VI processes align with reality. Research is needed to identify the most effective methods for conducting VIs. PDs will need to adapt their strategies to maximize the potential of VIs.	1	1.5	0.5	1	1	2	1	1
Hariton et al.	Perceptions and lessons from web-based interviews for the reproductive endocrinology and infertility fellowship application cycle	2021	fellowship	reproductive endocrinology and infertility	USA	Nationwide cross-sectional survey of applicants and PDs of reproductive endocrinology and infertility fellowships to evaluate experience and satisfaction with virtual recruitment through closed and open ended questions.	To evaluate the experience and perceptions of reproductive endocrinology and infertility fellowship applicants and PDs regarding the current and future use of VIs.	Zoom most commonly used format (74%). Tools employed to educate applicants about the programs included showing a video during the interview day (79%), showing a slideshow (79%), sending materials about the program via email (64%), expanding on information available on the internet (50%), and social media (7%). Most (86%) PDs hosted a social session. 71% were the night before and 14% were during t…	Quantitative Qualitative	Survey, Cost analysis	Before Match	30 applicants (RR 46%), 15 PDs (RR 46%)	Satisfaction: VIs were overall positive according to applicants and PDs. Fit: Most felt they could adequately assess fit. Confidence: The majority of applicants and PDs were able to rank with confidence. Cost: Costs were lower for both applicants and programs. Strengths / Weaknesses: Notable advantages include the cost and time savings, tech was easy, format was less stressful. Applicants were ab…	Fit: PDs agreed or strongly agreed they were able to convey what makes their program special to applicants (100%); accurately portray their faculty and trainees’ diversity (93%), clinical training (100%), and research opportunities (97%). However, only 35% felt they were able to give applicants a good sense of the programs’ clinical site and facilities. PDs agreed or strongly agreed they were abl…	Fit: Applicants agreed or strongly agreed interviewers were able to convey the strengths of the program (100%) and they were able to get a good sense of a program’s faculty and the trainee diversity (73%), clinical training (97%), and research opportunities (97%). 90% were able to adequately portray their strengths during the VI, and 93% believed that they were able to convey their specific inter…	N/A	Most (71%) PDs held the same number of interview sessions as last year, 21% held more and 7% held fewer. Most (57%) PDs responded interviewed more applicants, with 36% interviewing the same number and 7% fewer. The range of VIs attended was broad, with a plurality attending 15–20 (30%); Of note, 63% of the applicants interviewed at more programs than they would have otherwise if interviews were c…	N/A	N/A	The PDs’ median interview-related expenses were $100 (range: $0–2,500). This was <10% of the median interview expenses for the 2019 cycle, which was $1,125 (range: $200–$3,000). Most (65%) programs held between 2 and 3 sessions, with 14% of programs holding one session and 21% holding four to five. All (100%) applicants spent less money this interview season than anticipated before the COVID-19 p…	N/A	Fellowship applicants and PDs were overall positive about their VI experience, with all respondents finding this modality was adequate for conveying important information about themselves or the program. Respondents believed VIs were suitable for learning about various facets of a program including diversity, clinical training, and research. The notable exception was that less than half of the ap…	1. Ensure good virtual tours. 2. Evaluate content and efficacy and timing of social sessions as perceptions were highly variable across programs. 3. Program websites need to be kept up to date. 4. Interviews should not be longer than 30 mins, not with more than 2 faculty, and the day should not exceed 4-5 hrs. 5. Applicants should practice "mock" VIs. 6. Interviews should be standardized across p…	Low response rate limits generalizability.	VIs were overall positive according to applicants and PDs. Notable advantages include the cost and time savings. The majority of PDs felt that VIs would continue, in some form, in the future	Although the challenges that materialized from the COVID-19 pandemic were many, they additionally presented a unique opportunity for innovation and perhaps improvement in the time-consuming and expensive interview process. Future research is needed to understand specific factors that drive acceptance of WI's (e.g. the majority of persons applying to these fellowships were women and they had more …	1	1.5	0.5	1	1	2	1	1
Hemal et al.	Applicant preferences for virtual interviews: Insights from the 2020-21 integrated plastic surgery application cycle	2021	residency	integrated plastic surgery	USA	Cross-sectional survey of plastic surgery residency applicants containing closed and open ended questions about VI preferences and suggestions for future application cycles.	To assess how VIs impacted applicant familiarity with the residency program, faculty, and residents. To identify VI strategies that were most ideal from an applicant’s perspective and to provide comments on how the format could be improved in future years.	Static VI model: applicants rotate through several virtual faculty rooms, each with a unique meeting ID. Dynamic model: applicants and interviewers all join one meeting ID and a program coordinator dynamically pairs applicants and interviewers together at specified times using breakout rooms. The interviewers stay in the same breakout room and applicants rotate. Reverse dynamic model: the program…	Quantitative Qualitative	Survey	Before Match	155 applicants (RR 44%)	Format: Shorter interview days are preferred, however, medium to long days confer greater applicant familiarity with the program. Preferences include: 15 minute interview length, 1:1 with faculty, dynamic format, live information session, Zoom, breaks (for personal time, not hanging out with applicants / residents), virtual tour of hospital / city.	N/A	Format: Interview days ranged in length. The majority were medium length (3-7h). Short (<3h) interview days resulted in applicants being less familiar with the program, its people, and its location (P < 0.001). 86% preferred shorter days with fewer breaks. Interviews lasted a median of 15 minutes, and applicants’ preferred length was similar. 60% preferred to meet all faculty, while 17% preferred…	86% of applicants valued the standard interview release date with the weekend to consider their options before scheduling, however, there were concerns about uneven implementation with a minority of programs allowing scheduling before the set date. 96% of applicants attended pre-interview socials. 82% agreed pre-interview socials were valuable. 90% preferred smaller breakout rooms, 6% preferred o…	N/A	N/A	N/A	N/A	N/A	Residency interviews are the second most important factor in deciding where to rank a program and IPIs were traditionally important for determining "fit". VIs represent a seismic shift in the way interviews are conducted and an opportunity to rethink and optimize the residency selection process. Applicants appreciate the standardized interview release and scheduling dates, but note programs somet…	Applicants preferred small group breakout rooms for the pre-interview social. Applicants were less likely to be familiar with the program, people, and location if interview days lasted < 3 hours, however, most preferred shorter days. The ideal interview day length is long enough to allow applicants to acquaint themselves with the program / people, but short enough to preclude long periods between…	1) Limited to applicants at 3 programs. 2) Low response rate. 3) non response bias. 4) Responders may have obscured true opinions due to concern that a negative answer could impact their match. 5) Did not assess the impact on other aspects of resident recruitment (e.g., experience of faculty interviewers, money and time saved by applicants, and applicant perceptions of how participating in VIs im…	The VI format can be optimized in many ways to benefit both applicants and programs. The data presented in this article provide suggestions for future iterations of virtual interviews.	Uniform interview invitation letters should be provided on the standardized interview release date and programs should not allow interview scheduling before the set date. Pre-interview socials should be limited to an hour and have smaller breakout rooms organized by a theme. Interview days lasting more than three hours are best for promoting applicant familiarity with the program, its people, and…	1	1.5	0.5	1	0	2	1	1
Hill et al.	Program and candidate experience with virtual interviews for the 2020 complex general surgical oncology interview season during the COVID pandemic	2021	fellowship	complex general surgical oncology	USA	Cross-sectional survey of PDs and candidates on VIs for complex general surgical oncology (CGSO) fellowship to evaluate experiences and provide guidelines for future implementation.	To evaluate PDs and candidate experiences with VIs for the CGSO 2020 fellowship recruitment during the COVID-19 pandemic; To provide an outline for key components of VIs based on data gathered from these surveys and pooled experiences of the authors.	90% offered an introductory overview lecture by the PD. 71% provided pre-interview material, but only 26% provided a virtual tour. 61% performed a group interview (1 candidate with more than one faculty member). Individual interviews averaged 19 min. 77% offered a virtual, less formal Q & A session with the fellows.	Quantitative	Survey	Before Match	64 applicants (RR 79%), 30 PDs (RR 94%)	Satisfaction: Overall PDs and applicants found Vis to be convenient and technologically easy. Fit: PDs and applicants found it more difficult to assess fit, though a majority still felt capable. Confidence: PDs and applicants both felt comfortable creating rank lists after VIs. Future: More PDs and applicants prefer VIs for the future. EDI: Inequities may be introduced in a hybrid ("applicant cho…	Satisfaction: PDs agreed / strongly agreed VIs were convenient (90%) and the technology was easy to use (87%). Fit: VIs allowed for an accurate representation of themselves (63%), the program (63%), and the candidate (60%). Confidence: PDs felt comfortable creating a rank list (83%). Future: 60% would perform VIs over IPIs if given the option in the future. Comments noted VIs could be a good scre…	Satisfaction: Applicants agreed / strongly agreed VIs were convenient (97%) and the technology was easy to use (97%). Fit: candidates agreed / strongly agreed VIs allowed for an accurate representation of themselves (53%) and the program (50%). Confidence: 79% agreed / strongly agreed they felt comfortable creating a rank list. Future: If given the option, only 45% of candidates would choose VIs.…	A few noted interviewers seemed rushed or not engaged virtually.	PDs offered interviews to a mean of 30 candidates and 30 actually interviewed. Applicants applied to an average of 20 programs, were offered interviews at 11, and interviewed at 10 .	N/A	N/A	N/A	N/A	Most candidates interviewed at all or most programs that offered them an interview, and more applicants were offered interviews this season. Overall PDs and candidates found VIs convenient, the technology easy to use and most experienced few technical difficulties. Comfort in building a rank list was what was used to judge overall VI success. While this does not substitute for knowing if the acce…	Essential components of a VI: 1) A fellows only virtual meet and greet to allow fellows to interact with candidates in a less formal setting is key. 2) Pre-interview materials should be distributed in advance of the interview day. 3) Introductory lectures about the program should be delivered at the start of the interview day by the PD. 4) A video tour should be provided.	1) Small sample size (but response rate was excellent); 2) Candidates satisfaction with their performance could affect their willingness to respond and how they responded; 3) Results may not be translatable to other specialties.	Programs were able to deliver VIs with both programs and candidates having confidence in their rankings, despite little guidance on how to conduct VIs. Implementing the suggestions to improve the VI experience may improve future cycles.	Ranking can be done with confidence with Vis. Need to evaluate whether accepted applicants were 'a good match' on arrival.	1	1.5	1.5	1	0	1	1	1
Ho et al.	Virtual residency interviews: A survey of anesthesiology program director perspectives amidst the COVID-19 pandemic	2021	residency	anesthesiology	USA	A cross-sectional survey using open and closed ended questions of anesthesiology PDs related to their early experience with a fully VI cycle in 20-21.	To assess anesthesiology PD attitudes on VI during 20-21 and its effects on application criteria, ranking decisions and social media usage as compared to the 19-20 cycle	N/A	Quantitative Qualitative	Survey	Before Match	46 PDs (RR 32%)	Preference: Programs with smaller number of residents generally had a worse experience with VIs. Fit: majority of PDs thought it was difficult to make personal connections with interviewees, gauge candidate interest, and to gauge program culture, limited interactions with current residents. Strengths / Weaknesses: weaknesses of VI include: limited interactions with current residents, technologic …	Fit: 46% of PDs thought assessing candidacy of an applicant was worse with VI; 48% of PDs felt the applicants ability to gauge the merit of the program was worse with Vi; 39% of PDs thought perception of applicant commitment levels was worse than with IPIs.	N/A	The majority (61%) reported that interview duration remained the same as IP 30% offered shorter interviews. 89% programs reported receiving a greater number of applications, mostly mediated by US medical students.	N/A	N/A	N/A	N/A	N/A	The worse experience of smaller programs may be due to lack of resources or proportionally larger number of applicants per available position.	VIs offer financial savings, reduction in missed clinical workdays, more broad interviewing no longer limited by travel expenses and geography. Most common challenges included difficulty gauging candidate interest, inability to observe candidates interacting with people other than interviewers, and technological difficulties. Making personal connections is challenging with VI	Relatively small survey response rate could have introduced selection bias. The survey was completed at the end of the cycle prior to its conclusion, so some responses may have been premature.	Translating interpersonal relationships over VIs remains a barrier, likely exacerbated by the increase in applicant numbers.	Future research should focus on bridging the gap of interpersonal engagement in VI	1	1.5	0.5	1	1	1	1	1
Hollins et al.	Staying close to home: The effects of COVID-19 on the plastic surgery residency match	2021	residency	plastic surgery	USA	Surveyed PDs and applicants to integrated plastic surgery residency regarding match outcomes, comparing the 2020 and 2021 match. Also conducted a home match rate analysis for 2019-21.	To evaluate the trends of the 2020 and 2021 plastic surgery match. To examine changes in home match mates from 2019-21.	N/A	Quantitative	Match analysis, Survey	After Match, before arrival in program	19 PDs (RR 27.5%), 25 applicants in 2020 (RR 6.1%) and 68 applicants in 2021 (RR 21.9%)	Match outcomes: Students were more likely to have a connection (e.g., virtual sub-I, research) to matched institution in 2021 and home matches increased. LORs were more likely to come from home institutions, potentially disadvantaging those without a home institution. Costs for applicants decreased. Programs offered more interviews. Application inflation: The number of programs students applied t…	N/A	N/A	63% of PDs interviewed more applicants in 2021, 21% offered virtual sub-Is (and 50% thought they were helpful in evaluating applicants). The most important factors for ranking were LORs, the interview, USMLE score, research productivity and AOA.	N/A	According to student self report - not significantly different.	The home match rate was 26 of 177 (15%) in 2019, 32 of 180 (18%) in 2020 and 46 of 184 (26%) in 2021. There was a significant difference for all 3 years (P = 0.027). Comparison of individual years (using a corrected P value of α/3 = 0.017 for significance) demonstrated that the 2021 home match rate was significantly higher than the 2019 match rate (P = 0.010). However, significance was not found …	40% of applicants spent < $250 on VIs in 2021. 80% of students spent less than $2500. 84% spent more than $2500 in 2020. Cost differences were significant (p <0.001).	N/A	VIs and cancellation of IP sub-Is made it challenging to perform thorough evaluations. The PD survey results reinforce the importance of LORs. All students received fewer LORs from outside institutions and students without a home program were likely disadvantaged. A standardized LOR in the future may be beneficial. Lack of away rotations increased odds of matching with program with prior connecti…	N/A	1) selection bias, 2) low response rate (may not accurately reflect the entire cohort of applicants), 3) survey recipients were only those that applied to a single institution (though they matched at multiple), 4) subjectivity to interpretation of survey questions	Home matches were more likely. Completing a virtual rotation increased odds of match. VIs reduce financial burden on applicants.	Increase home match rates may reduce institutional diversity. Financial burden to applicants must be considered in future plans. Personal connections remain important and if Vis persist, will need to optimize away rotations, research and opportunities for virtual sub-Is.	2	1.5	0.5	1	N/A	2	1	3
Huppert et al.	A single center evaluation of applicant experiences in virtual interviews across eight internal medicine subspecialty fellowship programs.	2021	fellowship	internal medicine subspecialties: clinical informatics, endocrinology, gastroenterology, geriatrics, hematology/ oncology, hospice and palliative medicine, infectious diseases, and rheumatology.	USA	Cross-sectional survey using closed and open ended questions of applicants from 8 internal medicine (IM) subspecialty fellowship programs at a single institution. concerning the elements and effectiveness of the VI day, allowing for comparisons between interview structures and fellowships.	To evaluate how IM subspecialty fellowship applicants perceived the VI day.	The VI day lasted an average of 6.4 hours with an average of 3.7 breaks and 4.3 individual interviews.	Quantitative Qualitative	Survey	Before Match	75 applicants (RR 31%)	Interview format: <7 hours, with a presentation, four 1:1 interviews, interactions with fellows, & breaks seemed ideal to prevent fatigue yet allow for assessments. Fit: Almost all applicants reported being able to assess program culture, yet yearned for more in their comments. EDI: Most were able to get a sense of support for EDI, though URiM applicants were less likely to feel this way. Strengt…	N/A	Fit: Most agreed they felt a personal connection with interviewers (92%). Most interacted with 6–10 fellows (76%) during the VI day (92%) or night prior (15%) in large groups (45%), small groups (70%), 1:1 virtually (10%) or 1:1 via telephone (9.5%). Most agreed they met enough fellows to get the fellow perspective (81%) and they felt comfortable asking about ‘sensitive subjects’ (80%). Responses…	Most applicants agreed the VI day was long enough to gather necessary information (87%) but short enough to prevent fatigue (73%). Respondents who felt fatigued reported longer days (7.4 hours) than those without fatigue (6 hours) (p < 0.01). Most agreed breaks were adequate (90%). Almost all agreed the technical experience went smoothly (95%). Most reported individual VIs lasted 16–30 min (91%).…	N/A	When asked whether VIs impacted their anticipated rank position of the fellowship program, 44% indicated an anticipated positive change, 55% indicated no anticipated change.	N/A	N/A	N/A	VIs can be an effective way for applicants to evaluate most aspects of fellowship training programs. Strengths of the VI days included adequate length, number of breaks, organization/technical delivery, connection with interviewers, and the ability to assess the educational and cultural components of the program. There were also opportunities for improvement, such as the suggestion to shorten the…	1) Structure and organization of VIs: interview should be long enough to convey information but short enough to prevent fatigue (< 7 hrs) with adequate breaks; 1:1 interviews < 30 minutes each; technical support; meal breaks just for eating; email materials about program to applicants in advance. 2) Interactions with current fellows: allow for sufficient small group or 1:1 interactions; consider …	1) Low response rate; 2) Risk of non-response bias; 3) Response rate lower among those identifying as females and URiM; 4) Completed prior to match day and although emphasized results wouldn't have an impact on ranking / match, some may have been influenced to respond positively out of fear; 5) Some subspecialties were more represented.	VIs can be effective especially in a pandemic setting where IPIs are not possible. IPIs may still be preferrable to VIs for certain aspects of assessment and therefore offering an IP component in the future while optimizing aspects of VIs that continue will be important.	After the COVID-19 pandemic, programs may choose to offer both virtual and IPIs to meet the needs of all applicants. In this case, it will be critical to evaluate the experience and outcomes of a hybrid approach to ensure equity. For example, if a program offers VIs and optional IP visits, the latter component could be coordinated by a faculty/staff member not involved in the applicant selection …	1	0.5	0.5	1	1	2	1	1
Iwai et al.	Effect of the COVID-19 pandemic on the residency match among surgical specialties	2022	residency	general surgery, neurosurgery, OB-GYN, ophthalmology, orthopedic surgery, otolaryngology (ENT), plastic surgery, thoracic surgery, urology, vascular surgery	USA	Match analysis conducted by examining publicly available survey data for the 2018-20 and 2021 residency matches in 10 surgical subspecialties.	To investigate COVID-19's impact on the residency match, comparing applicants' characteristics, interview distribution, and related costs from 2018-20 and 2021; To determine if geographic connections played a larger role, if number of interviews per applicant increased, and if applications were more holistically reviewed, with research, volunteering and leadership given more weight.	N/A	Quantitative	Match analysis, Cost analysis	After Match, before arrival in program	5258 total applicants: 1,006 (RR 46%) in 2018, 1,224 (RR 41%) in 2019, 1,516 (RR 46%) in 2020, and 1,512 (RR 40%) in 2021.	Match outcomes: No major changes in matched applicant profiles in a variety of competitive surgical specialties. No apparent interview hoarding. Geographic distribution not impacted. Cost: VIs resulted in significant cost savings.	N/A	N/A	Comparing characteristics of matched applicants in 2018-20 and 2021, the number of clerkship honors decreased (4.0 vs 3.8, p=0.001) and the number of research experiences increased ((4.6 vs. 5.3, p<0.001). Slightly fewer interviews were offered (mean 14.8 vs. 16.7, p<0.001) but there was no difference in interviews attended (mean 13.1 vs. 13.3, p=0.136). The number of attended interviews did not …	N/A	N/A	No consistent pattern was seen in likelihood of match being related to geographical connection pre and post 2020. All matched applicants - 40.5% in 2018, 39.5% in 2019, 45.3% in 2020, 38.4% in 2021.	Applicants from the 2020-21 cycle reported significantly lower total costs (mean $1,959 vs $6,756; p<0.001), interview costs (mean $74 vs $3,426; p<0.001), and other costs (mean $645 vs $2,178, p<0.001). There was no significant difference in applicant-reported application costs between the 2020-21 cycle and prior years (mean $1,486 vs $1,505, p=0.440).	N/A	Contrary to what was anticipated, no significant changes in geographic connection were found between applicants and their matched program in 2021. The inability of applicants to connect with new programs via IP away rotations may have been partly mitigated by virtual away rotations. It's also possible students who could not attend interviews in previous years were able to interview at geographica…	N/A	1) data from self-reported surveys, subject to recall bias, 2) selection bias is also possible because matched applicants were more likely to respond, 3) no data were available on demographics (e.g., race, ethnicity, gender, or socioeconomic status), which impact an applicant’s access, interest, sense of belonging, and success in matching, 4) students may have interpreted geographic "connection" …	To a large degree, there appeared to be little specific change in matched applicant profile produced by COVID in a variety of competitive surgical specialties. The adoption of Vis and virtual away rotations may have successfully mitigated some adverse consequences of the pandemic without significant sequelae such as interview hoarding. Geographic distribution doesn't appear affected and VIs may c…	VIs do not appear to cause global "interview hoarding," though there may not have been appropriate sub-analyses to evaluate if top applicants were "hoarding interviews" to the detriment of lower performing or unmatched applicants. VIs saves costs for applicants which should inform future models.	2	1.5	0.5	1	N/A	2	1	3
Jimenez et al.	Perceptions of the virtual neurosurgery application cycle during the coronavirus disease 2019 (COVID-19) pandemic: A program director survey	2021	residency	neurosurgery	USA	Cross-sectional survey of neurosurgery surgery PDs and APDs containing closed and open ended questions about perceptions of the current virtual format for residency selection and interviews.	To analyze the perceptions of neurosurgery residency PDs and APDs regarding the 2020-2021 virtual application cycle, to inform and guide further changes regarding the reincorporation of IPIs during the next residency application cycle, and to determine both the efficacy of VIs and their possible role in future application cycles.	N/A	Quantitative Qualitative	Survey, Match analysis	Before Match	38 Interviewers, 32 PDs and 6 APDs (RR 27%)	Confidence / Fit: The majority felt confident in matching a good fit resident, though many felt the absence of away rotations limited the ability to assess candidates. Strengths & Weaknesses: Reduced costs. Overall quality of applicants similar. Number of applications increased, requiring programs to interview more applicants. Match outcomes: More DOs and fewer IMGs matched, whereas outcomes for …	A majority of respondents (73.7%) believed that students from more prestigious schools were more likely to benefit from VIs. Many respondents felt that DO students (71.1%), IMGs (68.4%), current residents (57.9%), those from less-prestigious programs (60.5%), or less-prestigious schools (60.5%) would likely suffer due to the VI format. A majority (55.2%) said the absence of away rotations limited…	N/A	Most programs (60.5%) perceived that the overall quality of applicants during the VI cycle was the same relative to last year, with 11 programs (28.9%) perceiving this year’s applicants as stronger and 4 programs (10.5%) perceiving applicants as weaker. Most (63.2%) did not use standardized interview questions, although a majority (76.3%) indicated they would be open to it. Perceptions on whether…	Compared with 2019-20, in 2020-21 programs received more applications (273 vs 312; p=0.0029) and interviewed more applicants (43 vs 73; p=0.13). Regarding incorporating preference signaling into future match cycles, many (39.5%) respondents expressed some interest, with 4 (10.5%) expressing strong interest, 4 (10.5%) neutral, 3 (7.9%) some disinterest, and 4 (10.5%) strong disinterest.	N/A	Match results between the 2019-20 and 2020-21 were similar, with the exception of DO applicants. The number of DOs matched more than doubled. Meanwhile the total DO applicants remained relatively unchanged, resulting in a 164.4% increase in the proportion of DO applicants successfully matching. The proportion of MD applicants who matched remained stable at 74%. The proportion of IMG applicants wh…	N/A	N/A	There were significantly more applications during the VI year. A small subset of competitive candidates may be accepting a disproportionately large number of interview offers. Preference signaling may be effective to ensure stronger applicants don't receive a disproportionately large share of the interviews. PDs felt certain groups were being disadvantaged (e.g., DOs, IMGs) but actual match resul…	N/A	1) Low response rate, reducing generalizability. 2) Selection bias. 3) Did not assess applicants or current residents. 4) Unable to determine if PDs and APDs were from the same program. 5) Limited to US Neurosurgery residency programs.	This study analyzes neurosurgery PD and APD perceptions of the VI format. A significantly greater number of applications were submitted, supporting the perception that VIs allowed applicants to apply to a greater number of programs. This did not lead to a significant increase in the number of applicants interviewed. The incorporation of VIs into future cycles warrants consideration of the benefit…	Surveys of applicants in the current cycle may help further clarify which, if any, candidates were truly disadvantaged by VIs. Subsequent investigations aimed at understanding the number of interviews top applicants attended in the virtual format compared with previous years may shed light on the impact of the virtual match on neurosurgery applicants collectively.	1	1.5	0.5	1	1	2	1	1
Jones et al.	Impact of COVID-19 on radiology residency selection process: A survey of radiology residency programs in the US	2022	residency	radiology	USA	The authors surveyed Radiology PD, APD, and other involved individuals regarding the 2021 virtual residency match in order to understand how radiology programs adapted to changes in the 2020-21 virtual application cycle.	To assess PD's attitudes on VIs and whether limited IP experiences impacted the interview process, number of applications, perceptions of the overall experience, resources used, application criteria, ranking decisions and social media usage.	N/A	Quantitative	Survey	After arrival in program	31 programs (PD or PC)	Satisfaction: The majority of PDs thought VIs were successful. Fit: The majority felt they could adequately gauge applicants. Preference: A slight majority of PDs preferred IP over VIs.	Preference: 35% VI; 45% IP; 20% No preference. Satisfaction: 68% thought VI were successful. Fit: 87% thought they could adequately gauge applicants through VI	N/A	The majority of programs offered more interviews than prior, none offered less. The majority updated their websites, included virtual department tours, virtual Q&As with residents and/or with the PD. Social Media: 52% programs not using social media prior to the pandemic created new accounts usually with Twitter or Instagram	N/A	Top 3 criteria used in ranking candidates pre and post covid were the same (Step 1, LOR, MSPE). 87% PDs said that social media interactions did not affect ranking.	N/A	N/A	N/A	PDs had an overall positive perception of VI, but were still split on which format they preferred, possibly due to limited ability for IP interactions/ experiences. Socioeconomic factors were the most commonly cited reason for continuing VIs post-pandemic. Ranking criteria remained largely unchanged. VIs have financial benefits for both programs and applicants, including improved equity for appli…	Programs must keep SM and websites up to date to attract high quality applicants. Advantages of VIs included reduced cost and travel time for applicants, increased flexibility of scheduling and increased interview days offered. Disadvantages included reduced ability for applicants to learn about the programs, difficulty for program to highlight physical facilities, and technical difficulties.	Research restricted to one application cycle and did not survey PDs on whether limited in person away rotations created a ""home field"" advantage. Response rate was low, with more small programs responding. So, it is not clear if results are generalizable to programs of different sizes. PCs and PDs could have responded to the same question differently. Definition of ""success"" not specifically …	VIs are an adequate substitution for IPIs. VIs did not change criteria used for ranking. Social media use by programs increased.	How the change in USMLE to pass/fail impacts rankings remains to be seen. New ways to assess interpersonal skills and professionalism should be considered. Future research should also analyze geographic matching trends and long term implications of overapplication effect.	1	1.5	0.5	1	0	2	1	1
Kamboj, Chandrasekhara et al.	How we did it: Virtual interviews with an eye toward the future	2021	fellowship	gastroenterology	USA	Survey of PDs across the country and applicants to a single GI fellowship at Mayo Clinic about their experience with VIs.	To understand the experiences and preferences of PDs and applicants regarding VIs for GI fellowship	VI day formats varied across programs. Most had 1:1 faculty: applicant interviews (62%) and a duration of 20 min (44%). Applicants preferred 1:1 interviews (67%) and 20-minute interviews (68%). Nearly two-thirds of programs provided a welcome packet (64%) and virtual tour (67%). Most (96%) offered a session where applicants could interact with fellows without faculty present.	Quantitative	Survey	Before Match	45 PDs (RR 23%), 117 applicants (RR 28%)	Format: Shorter (20 minute) 1:1 interviews are preferred to longer group formats. Satisfaction: Vis are generally favorable according to applicants and PDs. Cost: Cost and time savings are clear advantages. Fit: Difficulty getting a sense of the program culture and/or city remains a significant challenge, though many aspects of fit PDs and applicants were able to assess without difficulty. Applic…	Most PDs (87%) felt that they could use the virtual platform effectively. Satisfaction: 76% reported overall satisfaction with VIs and 90% reported that VIs met or exceeded their expectations. Fit: Programs were satisfied with an understanding of applicant background (93%), career aspirations (82%), interpersonal skills (71%), and professionalism (69%). More than half the programs (58%) expressed…	Satisfaction: 72% of applicants expressed overall satisfaction with VIs and 90% felt VIs met or exceeded their expectations. 83% felt they had sufficient opportunities to have their questions answered. Fit: Applicants were satisfied with their understanding of program clinical responsibilities (80%), academic expectations (80%), procedural volume (76%), and job placement (69%). Less than half fel…	N/A	53 % of programs interviewed more applicants. 43% of applicants interviewed at more programs (mean 10.2, SD 5.8).	N/A	N/A	Applicants considered cost savings to be the biggest benefit of VIs.	N/A	Much of the bidirectional communication that should occur during the interview day can occur in the virtual setting. Shorter, individualized formats for interviews are preferable to longer, group formats. Programs and applicants were overall satisfied with VIs and most of its components. More work needs to be performed to better showcase life inside and outside the program virtually. Although pro…	Virtual social events and hospital/city tours to approximate the IPI day are needed. Providing informational materials to applicants before the interview day allows focus on the applicants and the unique program strengths during the IP experience. Given that bias related to interview format preference (virtual vs IP) may affect program perception of applicants, implicit bias mitigation workshops …		VIs are effective and have several advantages over IPIs and their success should make us consider their role in future cycles. Optimizing the VI toolkit will be important as VIs are likely to remain at least a component of recruitment in the future.	Though IPIs will likely return, VIs have a lot of advantages. Best practices should be followed to minimize bias if hybrid formats are used. Standardized interview questions and holistic review processes need further emphasis for equity.	1	0.5	0.5	1	0	1	1	1
Kamboj, Raffals et al.	Virtual interviews during the COVID-19 pandemic: A survey of advanced endoscopy fellowship applicants and programs	2021	fellowship	advanced endoscopy	USA	Survey of fellowship interviewers nationally and applicants to one advanced endoscopy program, examining and comparing their experiences with VIs.	To assess applicant and interviewer satisfaction and preferences regarding VIs and future interview format options; To assess the importance of factors contributing to rankings of both applicants and programs during this application cycle.	Most applicants (65%) preferred a 1:1 applicant: faculty interview ratio and a 20-minute interview length (74%), which was used by programs 51% and 48%, respectively.	Quantitative	Survey	Before and after Match	37 applicants (RR 43%); 41 PDs, 29 faculty, and 1 fellow interviewers (RR unknown)	Satisfaction: Both applicants and interviewers reported a high degree of satisfaction with VIs. Fit: Difficulty getting to know the site / city was challenging, but many other components of fit could be assessed by applicants and PDs. Strengths / Weaknesses: Cost, reduced need to use vacation / personal days; applicants could not get a good sense of the endoscopy suite, facilitates, city nor a fe…	Satisfaction: 77% of interviewers were satisfied overall with VIs. Compared to their predetermined thoughts on VIs, 57% rated their experience above expectations and 42% felt it met expectations. Fit: Interviewers were satisfied with understanding of applicant background (91%), interpersonal skills (78%), professionalism (80%), and career aspirations (87%). 49% were dissatisfied with their abilit…	Satisfaction: 82% of applicants were satisfied overall with VIs. Compared to their predetermined thoughts on VIs, 50% rated their actual experience above expectations and 44% felt it met expectations. The majority were satisfied with exposure to current fellows (74%) & faculty (82%), and the opportunity to have questions answered (91%). Fit: The majority were satisfied with their ability to under…	N/A	41% applicants interviewed at more programs than originally planned, 35% at the same number, and 24% at fewer. Applicants interviewed at a mean of 10.7 programs (SD 6.5), with 62% interviewing at > 10 programs. Half (52%) of interviewers reported interviewing the same number of applicants this year, while 34% reported interviewing a greater number and 14% reported interviewing fewer.	N/A	Match rate 61%, similar to prior years (60%)	N/A	N/A	Both applicants and interviewers reported a very high degree of satisfaction with VIs, and most said their expectations were met or exceeded (which is important, as studies of faculty / learner opinions of VIs prior to actually engaging in VIs were more negative). The high satisfaction underscores educators and learners adaptability in the face of adverse circumstances. Most applicants and interv…	There are some "best format practices" that can help programs put together VIs that are most effective for applicants (e.g., 1:1 interviews, 20 min each). Virtual tour of the endoscopy suite, equipment and city would be helpful. Added activities that allow applicants to get a sense of the culture are needed (e.g., more fellow interactions via social hours, Q & A, etc.)	1) Response bias; 2) Inability to contact applicants that didn't apply to the program (Mayo Clinic); 3) Did not include fellowship programs outside the match; 4) Lower applicant response rate.	The majority of applicants and interviewers reported overall satisfaction with VIs. Applicant and program match rates with VIs were similar to historical match rates that utilized traditional IPIs. Given the potential benefits, VIs may have an increasing role in future residency and fellowship applications. Programs that conduct VIs need to be aware of the limitations of this format and have meas…	More interviewers than applicants felt the VI was important in ranking, and applicants should be aware of this. Interviewers may be favorably biased towards those who select IP options if both are offered in the future. This can disadvantage parents, those with disabilities limiting travel (including pregnancy), URiM, low SES applicants, residency limitations on time away, etc. Steps must be take…	1	0.5	0.5	1	0	2	1	1
Kamel et al.	Analyzing the landscape of the 2021 virtual match: A nationwide survey of radiology programs' stakeholders	2021	residency	radiology	USA	The authors surveyed radiology PDs and APDs, and other involved individuals to identify adaptive strategies, benefits, and challenges of the 2021 virtual application cycle. The survey consisted of mostly closed and one open-ended question.	To identify the effects of COVID-19 pandemic on the 2021 virtual Match, specifically on the interview process, number of applications, perceptions of the overall experience, and resources used	N/A	Quantitative Qualitative	Survey	Unclear, but before arrival in program	125 interviewers (72 PDs, 21 APDs, 31 other)	Fit: The majority of programs thought VIs were effective in gauging applicants' candidacy. Slightly less than half agreed applicants were able to gauge advantages of their program. Strengths: decreased cost, time flexibility, less faculty burden, and increased number of offered interviews. Preference: < half would return to IPIs, and a small number would use a hybrid model. EDI: The majority of r…	Fit: 64% agreed that VI were effective in assessing candidacy of an applicant; 47% agreed that applicants could gauge the advantages of the program with VI. Cost: 81% think decrease cost is an advantage of VI. Advantages: flexibility of time 46%, less faculty burden 40%, increased number of offered interviews 34%. Preference: 47% will return to IP; 25% will continue VI; 15% hybrid; 10% undecided.…	N/A	47% of programs thought physical presence of IMGs in the US during Match was important or extremely important. 73% reported an increase in total number of applications received. 63% reported offering more interviews. Social media: most frequently used Twitter 62%, Instagram 45%, Facebook 40%; Most helpful to showcase the program: website 65%, Twitter 42%, Instagram 26%	55% supported use of signaling (letters of intent); 42% thought number of applications should be limited.	Ranking criteria: The highest rated ranking factors in 2021 were MSPE, USMLE/COMLEX 1 scores, letters of recommendation, class rank. Factors considered by program in ranking changed with less emphasis on away rotations, no failed step attempts, radiology grades and more emphasis on personal statements.	N/A	No formal cost analysis performed but majority of programs reported cost advantages to both programs and applicants.	N/A	Most programs agreed VIs were effective in gauging applicants, but had mixed responses on whether applicants could adequately assess their programs' advantages. There were few differences in how applicants were assessed, although rotations carried less weight, possibly due to disruption of IP education. Advantages included decreased cost. Overapplication remains a concern. Programs received more …	The availability of robust communication technology, internet infrastructure and social media presence facilitated programs' adaptation to VIs.	Number of unique programs represented is difficult to calculate and the results may represent aggregate of opinions from the same institutions. Results may not represent programs in all regions or in community-based settings. Response rate was difficult to determine as the survey could be forwarded by a recipient. Since more than just PDs could respond, respondents might have different levels of …	Most programs adjusted well to VIs, thought they were effective and cited many benefits. Opinions about future models remained mixed. Social media and websites are important recruitment tools. Programs are increasingly aware of importance of DEI as measures to recruit diverse applicant pools increased.	Programs could invest more resources to improve the experience of interviewers and applicants in upcoming cycles, and it is necessary to improve applicant assessment criteria particularly with increased applications. Holistic review and AI may help predict performance. It remains to be seen which model (in person, virtual, hybrid) is best. Future studies should assess implications of demographic …	1	1.5	0.5	1	0	2	1	1
Kraft et al.	Applicant perspectives on virtual otolaryngology residency interviews	2022	residency	otolaryngology	USA	Cross-sectional survey of otolaryngology applicants’ attitudes towards VI containing closed and open ended questions.	To identify how virtual residency interviews allow for assessment of core factors used by otolaryngology residency applicants to rank programs in The Match and to determine applicant satisfaction with the VI process. To inform relevant stakeholders of VIs specific limitations and allow for an evidence-based and tailored approach to utilizing VIs in subsequent cycles.	N/A	Quantitative Qualitative	Survey	Before Match	187 applicants (RR 33%)	Satisfaction: The majority were satisfied and found VIs to provide high quality interactions with residents and faculty. Fit: Applicants got an adequate sense of camaraderie, & a "feel" for the program, though it was more difficult to get a sense of the city / geographic location. Cost: was significantly lower and this mattered more to high debt applicants. URiM applicants were more concerned abo…	N/A	Satisfaction: 66% of applicants were satisfied or very satisfied with VIs, 22% neutral, 11% dissatisfied; Applicants had high quality interactions with faculty (mean 4.0, SD 0.7) and residents (mean 3.5, SD 0.9); FIt: They were able to adequately assess resident satisfaction (mean 3.0, SD 0.9), camaraderie (mean 3.3, SD 1.0), and get a "feel" for the program (mean 3.5, SD 0.8). Residents were not…	Applicants most commonly received 6-10 interviews (27%), followed by 11-15 (25%), and 21-30 (15%). Only 12% reported receiving 5 or fewer interviews, and 6%. received over 30 interviews. Most applicants planned on attending 6-10 interviews (28%), 11-15 interviews (28%), or 16-20 interviews (26%). By survey close (February 24th, 2021), most applicants had completed 6-10 interviews (29%), 11-15 int…	N/A	N/A	N/A	68% of applicants were concerned about cost of IPIs before the switch to VIs. Estimated cost savings with VI: 15% $500-2K, 28% $2K-$5K, 32% $5K-$8K, 25% >$8K. High debt students were more concerned about the cost of IPIs vs low debt students (75% vs 25%, p=0.0007). URiM status was associated with expected cost savings (p = .032). More URiM students were concerned about the financial burden of VIs…	N/A	Applicants were generally satisfied with VIs, identifying ease of tech, quality faculty interactions, time and money saved as strengths. Resident interactions and getting a sense of the geographic location were limitations. Comments emphasized the more equitable process, though assessing fit was a key point of weakness. # of interviews were normally distributed among applicants - since a small pe…	Future applicants would benefit from transparency around residency camaraderie and satisfaction, as well as measures to create more meaningful time with residents. Geographic limitations of the VI may be overcome with IP “second looks” after an initial VI. Adopting VI may reduce costs, impact on debt, and improve equity.	1) Low response rate. 2) May not reflect the broader population of applicants. 3) Response bias. 4) Does not account for changes in attitudes over time. 5) Did not include PDs. 6) Did not directly compare VIs with IPIs to determine which was better at selecting applicants who will become successful residents.	Applicants were satisfied with the VI process. They identified meaningful interactions with faculty, time and money saved, and ease of use of technology as strengths of the VI format. IP “second look” events and resident-focused information sessions with break-out rooms are worthy additions to the VI cycle. Given that few applicants reported completing more than 20 interviews, interview caps coul…	Additional studies are needed to determine whether VIs are an effective alternative to IPIs, though this study gives us confidence that applicants are largely satisfied. Longitudinal study designs are needed where feasible so the effectiveness of the VI for both applicants and programs long term could be assessed. IP second looks could ameliorate some of the concerns about assessment of fit, and …	1	1.5	0.5	1	1	2	1	1
Lenze et al.	Impact of the COVID-19 pandemic on the 2021 otolaryngology residency match: analysis of the Texas STAR database	2022	residency	otolaryngology	USA	Match analysis conducted by examining publicly available survey data for the 2018-20 and 2021 ENT residency matches.	To estimate the impact of the COVID-19 pandemic and preference signaling on the 2021 ENT match with regard to geographic clustering, interview distribution, applicant-reported costs, and matched applicant characteristics.	N/A	Quantitative	Match analysis, Cost analysis	After Match, before arrival in program	442 applicants: 329 from 2018-2020 and 113 from 21. RR 46% in 2018, 41% in 2019, 46% in 2020, and 40% in 2021	Match outcomes: No major changes in matched applicant profiles in ENT. Geographic distribution was not impacted. Application inflation: The average number of interviews per applicant was slightly reduced. Interview hoarding was not apparent. Cost: VIs resulted in marked cost savings.	N/A	N/A	Matched applicants attended an average of 12.2 interviews in 2021, compared to 13.3 in prior years (p=0.04). The number of interviews attended by unmatched applicants in 2021 was not significantly different from prior years. The number of attended interviews did not demonstrate significant skew, and interview hoarding did not appear to be occurring. Applicant characteristics between matched appli…	Preference signaling was implemented in 2020-21. Applicants sent 29% of signals to programs where they had a geographic connections, 26% to Top 20 ranked programs on Doximity, and 15% to programs in the Top 10. The mean signal yield (# of interviews at signaled programs/total # of signals sent) was 0.61. There was no significant correlation between signal yield and % of signals an applicant sent …	N/A	No significant difference in percentage of applicants with a geographic connection to their matched program (30.7% in 2018-20 vs. 40.0% in 2021; P = .139).	Applicants in 2021 reported significantly lower total costs compared to applicants in prior years (mean $2,013 vs. $7,509; median $5,496, p <0.001). When broken down by categories, applicants in 2021 reported spending an average of $1,651 on application fees, $64 on VIs, and $667 on other costs. Applicants from prior years reported spending an average of $1,612 on application fees (p=0.642), $3,5…	N/A	Overall, less impact on match from COVID-19 than expected. Matched applicants did not attend significantly more interviews (despite the absence of time / monetary constraints) and were not more likely to match in a program where they had a geographic connection (despite familiarity and personal connections). Preference signaling may have helped geographic dispersal and applicants may have been mo…	N/A	1) low response rate (20.7%) and small sample size, 2) may not be generalizable to all ENT applicants as some medical schools didn't participate and IMGs are excluded, 3) recall bias and selection bias, 4) the percentage of matched applicants in the sample (87.3%) overestimates the match rate for ENT, suggesting that matched applicants were more likely to respond to the survey, 5) information on …	COVID did not appear to result in significant differences in matched applicant characteristics for ENT. There was no evidence of interview hoarding or increased matching in familiar geographic regions. Applicants reported significantly lower costs. Some virtual adaptations may be worth considering in future match cycles.	No evidence of interview hoarding or significant increased chance of regional match. Cost savings are significant, though the resumption of more away rotations may drive costs back up. Limits to away rotations (one for all students, and 2 for applicants without a home program) have been suggested. The number of preference signals can likely be decreased from 5 to 4. Hybrid models in the future th…	2	1.5	0.5	1	N/A	2	1	3
Lewit & Gosain	Virtual interviews may fall short for pediatric surgery fellowships: Lessons learned from COVID-19/SARS-CoV-2	2021	fellowship	pediatric surgery	USA	Survey of faculty and applicants to a single pediatric surgery fellowship program about their feelings towards VI. In 2020, the last of 3 interview days at this institution was converted from IPI to VIs.	To determine the perceptions and perceived value of VIs in the Pediatric Surgery fellowship interview process by both the applicants and faculty.	The PD gave introduction, then the senior fellow presented a video about the program. Using Zoom breakout rooms, applicants rotated through 8-9 thirty-minute interviews with faculty and fellows. In lieu of lunch, the PD held a wrap-up meeting to answer any questions. A video tour was provided.	Quantitative	Survey	Before Match	8 faculty interviewers (RR 89%), 14 applicants (RR 23%)	Fit: Applicants and faculty felt they were able to get to know one another better IP. Cost: IPIs are more costly. Ranking: Both felt Vis influenced their rank lists. Preference / Future: The majority of faculty and applicants preferred IPIs or the use of Vis in a hybrid model as a screening tool.	Fit: Faculty felt they got to know applicants better IP compared to virtually (6 vs 8 on a 10 point scale, p=0.11). Ranking: Faculty reported VIs. influenced their rank list (median 3, rank 1-6). Future: 75% faculty preferred IPIs, 12.5% Vis, and 12.5% had no preference. Faculty recommended VIs as complete replacements (5, scale 1-10), as an option (6), or as a screening tool (7).	Fit: Applicants felt they got to know the program better IP compared to virtually (6 vs 8 on a 10 point scale, p=0.002). Ranking: Applicants reported VIs influenced their rank list (median score 5, range 2-8). Applicants indicated that for the top 5 programs on their rank list, the majority were at programs where they interviewed IP. Future: 87.5% applicants preferred IPIs, 12.5% preferred VIs. A…	N/A	N/A	N/A	N/A	Most applicants completed the bulk of their interviews IP, before the switch to VIs. Expanses ranged from $2500-20,000. 0% spent < $2,500, 14% $2,500-5,000, 14% $5,000-7,500, 28% $7,500-10,000, 28% $10,000-15,000, 14% $15,000 - 20,000.	N/A	All participants in this survey had some interviews that were conducted IP and at least 1 conducted virtually. Both faculty and applicants preferred IP over VIs, with applicants feeling stronger than faculty about this. Both felt VIs could be used as a screening tool in the future. Applicants were against providing an option of IPIs vs VIs though faculty would support this. Applicants were more l…	VI are doable if there are no other options; if options exist, preference for IPIs for both faculty and applicants	1) Single institution; 2) very small sample size; 3) low response rate for applicants; 4) survey fatigue form numerous COVID related surveys	Faculty and applicants who participated in this pilot study did not recommend that VIs replace IPIs in the future. Applicants reporting did not feel they got to know the programs as well through VIs and inter­view type had an effect on their final rank list. As the COVID-19 pandemic continues, more VIs will be necessary, and innovations are needed to ensure an optimal interview process.	The differences in ranking when a combination of IPIs and VIs are used, highlights the need for standardization for fairness. Otherwise, people will preference programs or applicants that completed IPIs. VIs as an option is probably not viable. Further evaluation recommended prior to making global decisions about what should happen in future cycles.	1	0.5	0.5	1	0	2	1	1
Lewkowitz et al.	Effect of virtual interviewing on applicant approach to and perspective of the maternal-fetal medicine subspecialty fellowship match	2021	fellowship	maternal-fetal medicine	USA	Cross-sectional survey comparing applicants' perspectives of recruitment during the IP era (2017-2019) to the virtual era (2020) for MFM fellowship programs. (During the 2020 cycle all applicants were informed of interview invites the same day, which was not the case in previous cycles.) Outcomes assessed included interviews offered, completed & cancelled; programs ranked; cost & time saved; impr…	To compare approaches and perspectives of candidates for Maternal-Fetal Medicine (MFM) subspecialty fellowship candidates who applied in the 2020 VI cycle with those of the current MFM fellows who applied with IP interviews from 2017-19.	N/A	Quantitative	Survey, Cost analysis	After Match, before arrival in program (for 2020 applicants, after Match, after arrival in program for 2017-19 applicants)	46 applicants in 2020 (RR 34%); 28 applicants in 2017, 33 in 2018, 33 in 2019 (RR 23% of current fellows)	Satisfaction: Satisfaction was better than expected. Fit: Most felt they could got a similar or more comprehensive sense of the culture through VI and a majority felt they were able to adequately assess fit. Application inflation: VI applicants applied to more programs and were less likely to cancel interviews compared to IP applicants, due to reduced scheduling conflicts, costs & residency limit…	N/A	Satisfaction: Nearly half the applicants reported that the VI experience was better than expected, with an additional 30% reporting the experience was slightly better than expected. No candidate reported the experience was slightly worse or worse than expected. Fit: Nearly two-thirds of the VI applicants (60.9%) reported that, compared with their IP residency match, they received a similar or eve…	N/A	The # of programs to which each applicant applied differed between groups (p=0.02). 30% of VI applicants applied to 25-29 programs, 44% applied to > 30; comparatively, 14% of IP applicants applied to 25-29 programs and 33.0% applied > 30. The # of interviews received was similar, but VI applicants were less likely to decline interviews (39% vs 72%, p<0.001). When interviews were declined, VI appl…	Virtual applicants listed a similar number of programs on their rank list (p=0.1), however, a higher percentage of VI applicants ranked > 20 programs (13% vs 4%).	N/A	The overall cost of interviews (ERAS fees, NRMP tech, travel, wardrobe) and total days away from work for interviewing differed for virtual vs IP applicants (p<0.001 for both). Nearly two-thirds of VI applicants (65%) spent $0 - $1,000, 30% $1,000 - $5,000, 4% $5,000 - $10,000, and none spent > $10,000; Conversely, 3% of IP applicants spent < $1,000, 25% $1,000 - $5,000, 38% $5,000 - $8,000, 19% …	N/A	Most applicants were satisfied with the VI process. Costs were reduced without a concomitant reduction in ability to critically assess culture and fit in MFM fellowship programs. From an applicant perspective, VIs are thus a viable option for the future. They may be of particular interest to those with financial constraints or familial obligations and most applicants support a hybrid approach. An…	Getting a sense of a program's culture is challenging and ongoing efforts to improve this aspect of VIs is needed.	1) Low response rate / small sample size; 2) Selection or non-response bias; 3) Applicants who were not chief residents were not included; 4) 2020 match was first to have single interview offer release date which may have confounded the IP vs VI cancellation rates; 5) Data was not available on those that didn't receive an interview; 6) recall bias; 7) 2 fellowships offered hybrid interviews in 20…	The virtual 2020 fellowship match was viewed favorably by most applicants and associated with a marked reduction in costs without a concomitant reduction of reported ability to critically examine programs. As such, from an applicant perspective, VIs should still be considered a viable option in the future, even if IPIs are feasible. An increase in the number of programs applied to and reduction i…	Since candidates are less likely to cancel interviews once scheduled compared to IP applicants, PDs must adapt their practices to accommodate reduced mobility on their wait list. MFM fellowship PDs and OBGYN residency PDs should jointly create national recommendations or guidelines related to the maximum number of programs applied to or interviews allowed. Research leveraging qualitative research…	1	1.5	0.5	1	1	2	1	1
Lund et al.	Conducting virtual simulated skills multiple mini-interviews for general surgery residency interviews	2021	residency	surgery	USA	A virtual MMI was deployed to assess technical and nontechnical skills (communication, emotional intelligence, anatomical knowledge, interpretation of medical tests, knot tying and suturing) during general surgery residency interviews. The MMI was conducted synchronously and students were also asked to submit a video of themselves performing knot tying and suturing tasks, which was reviewed async…	To demonstrate the feasibility of virtually assessing general surgery applicants technical and non technical skills; To transition formerly IP simulated skills assessments online.	Applicants were mailed instructional videos and a practice kit ($23). Applicants rotated through 5 MMI stations (4 min each, 1 min instructions, 3 min assessment). In the 4 synchronous stations (communication, emotional intelligence , anatomical knowledge, and interpretation of tests), applicants were assessed over a live video call by trained general surgery interns in the simulation center. For…	Quantitative	Survey	Before Match	50 applicants (RR 46%)	Satisfaction: Applicants were very satisfied with the virtual MMI assessment, and most felt the objectives were met. Ranking: Score distribution allowed for distinction of performances to inform rank decisions.	N/A	Satisfaction: Mean 4.3 out of 5 (5=very satisfied). The majority felt MMI assessment objectives were met (communication:78%, Emotional Intelligence: 86%, Anatomy: 86%, Interpretation of tests:70%) and commented that the technical skills assessment was an "amazing experience" and “it got me in the habit of practicing every day.”.	N/A	N/A	Score distribution allowed for distinction of performances. Using overall MMI score, interviewees were placed in quartiles. Quartiles were used by program leadership to inform rank list decisions - equally weighed with traditional faculty and PD interviews and application details (i.e., letters of recommendation, examination scores, etc.)	N/A	N/A	N/A	MMI and virtual skills assessments for residency interviews are feasible, providing a comprehensive picture of applicants’ abilities when gathering IP is not feasible. Mailing preparation materials for the assessments identifies applicants’ preparedness and dedication to practice and improving their skills.	To account for technical challenges, build in a buffer. A one-minute gap in between stations and built-in breaks during and after each assessment rotation, is critical to prevent potential interruptions from internet connection issues. Trial runs can help identify potential problems. A technical support team was available to applicants by phone.	N/A	Virtual skill based MMIs can provide useful data to program leadership and a valuable experience for applicants. Utilization of virtual skills assessments in residency interviews is a large step forward in expanding their accessibility.	This was a really unique and novel study. MMIs are rarely deployed during residency interviews yet they are an ideal method of gathering diverse information about applicants, and they have been shown to transition well to the virtual setting. In the future, virtual assessments, such as this virtual MMIs, could be applied broadly to assess both technical and nontechnical skills of medical students…	1	0.5	0.5	1	1	1	1	1.5
Majumder et al.	Initial experience with a virtual platform for advanced gastrointestinal minimally invasive surgery fellowship interviews	2020	fellowship	advanced gastrointestinal minimally invasive surgery	USA	Survey of faculty and applicants to a single advanced GI minimally invasive surgery fellowship to assess their experience, and the value and limitations of VIs using closed and open ended questions.	To describe the experience of applicants with the VI process, and assess feasibility, appropriateness, and acceptability of using the videoconferencing platform during the 2019-20 fellowship cycle.	All parties gathered in a central VI hub. The PD gave an overview of the program. Then faculty and applicants were assigned to breakout rooms for 5-7, semi-structured, 1:1, 15 min Interviews. A timer was displayed on screen throughout and a 1 min warning given. At the end of each interview all parties returned to the central hub and were reassigned during a 1 min break. The day concluded with a Q…	Quantitative Qualitative	Survey	Before Match	17 applicants (RR 85%), 7 faculty interviewers (RR 100%)	Satisfaction: Faculty, and to a slightly lesser extent, applicants were very satisfied with VIs, and expectations were met or exceeded. Fit: Faculty and applicants, found it easy to interact virtually, but applicants missed IPI with faculty / fellows and to physically see the program / city. Format: Most appreciated the automated end of interview warnings, but a few felt it was abrupt. Future: Al…	Satisfaction: All faculty were satisfied, with the vast majority (86%) being extremely satisfied with VIs. 100 % stated VIs exceeded or far exceeded their expectations. Fit: 100% of faculty rated the ability to interact with the candidates as extremely easy. Regarding the lack of IP interactions, 86% felt there was little to no effect, whereas 14% reported a moderate effect. Format: 100% found th…	Satisfaction: Applicants were extremely satisfied (82%), somewhat (12% ), or neutral (6%) with VIs. VIs exceeded or far exceeded expectations (53%), neutral (35%), fell short (12%). Applicants general attitudes toward VIs prior to this VI were extremely / somewhat positive (47%), neutral (40%), or somewhat negative (13%). Compared to prior VIs this VI was much / somewhat better (75%), or the same…	N/A	N/A	N/A	N/A	N/A	N/A	Of the many adaptations that have taken place during COVID, VIs are likely to endure. VIs work well overall. Both faculty and applicants felt satisfied with the process and both recommended continued use of VI in future. Many strategies exist for how to construct the VI day, and ease of interaction is paramount. The stability and clarity of the software platform and connectivity are critical. One…	Process works well overall. A small number of technical challenges occurred, and preparation is critical. These will likely diminish naturally as people gain familiarity with virtual platforms. In the future attendance of an educational case conference, and virtual tour may be added.	1) No IP control group - did not ask applicants to compare VI with in person earlier in the interview cycle (or in other setting); 2) Small sample size	VIs are feasible and should continue. VIs may be used as a screening tool in the future with more limited IPIs, or they may be used for candidates unable to attend IP.	VIs are a viable approach with significant upsides (limits cost, travel, time away from training); both applicants and faculty satisfied. However, they did not assess whether, given choice, applicants or faculty would prefer VI in future vs IP.	1	0.5	1.5	1	0	1	1	1
Menhaji et al.	Virtual interviews during COVID-19: Perspectives of female pelvic medicine and reconstructive surgery program directors	2021	fellowship	female pelvic medicine & reconstructive surgery	USA	Cross-sectional survey of female pelvic medicine and reconstructive surgery fellowship PDs to assess their sense of the effectiveness and satisfaction with Vis.	To evaluate PDs’ perceptions on the effectiveness of VIs compared with IPIs for the assessment and evaluation of fellowship candidates; To assess PDs' satisfaction with VIs for evaluating applicants, preferences for future interviews, as well as likelihood of using VIs in future match cycles.	Only 33% of PDs modified their interview format for VIs. 91% interviewed multiple applicants / day. Interview formats varied: 1:1 (58%), panel of applicants to 1 interviewer (2%); panel of interviewers to 1 applicant (39%); panel of applicants to panel of interviewers (7%).	Quantitative	Survey	Before Match	57 PDs (RR 82.6%)	Satisfaction: overall, PDs were satisfied with VIs. PDs perceived VIs as effective for evaluating applicants. Preference/ Future: Most PDs preferred IPIs. Nonetheless, the majority are likely to use VIs in the future, though those who had challenges with organization and those who changed their formats were less likely to want to do so.	Satisfaction: 87% were satisfied with VIs compared to IPIs. 89% felt VIs were effective for assessing and evaluating applicants. 95% of PDs who felt VIs were effective also felt satisfied with VIs, whereas only 20% of those who thought VIs were ineffective were satisfied (p = 0.0005). Future: Despite high satisfaction, only 31% preferred VIs to IPIs. Yet, 60% noted they are likely to use VIs in t…	N/A	N/A	N/A	N/A	N/A	N/A	N/A	Overall, PDs felt VIs were effective (supporting their use in creating rank lists) and most were satisfied. Most PDs preferred IPIs, however, they are likely to use VIs in the future. Factors most associated with a highly successful match (research publications and LORs) are not impacted by the virtual format. VIs may be used in the future as a screening tool followed by IPIs, an adjunct to IPIs,…	Vis are feasible and can be arranged and carried out quickly. It will be important to continue to iron out technical challenges.	1) Non-validated survey; 2) Non response bias; 3) Applicant perspectives not assessed; 4) Small sample size.	The PD community was at the forefront of adapting to VI formats. PDs found VIs highly effective and were satisfied with the use of virtual formats for assessing applicants. Many are likely to use VIs in the future. Further investigations are needed to determine if VIs can substitute for IPIs, or if they have another role in screening or as an adjunct to IPIs.	VIs are acceptable and well received, albeit not preferred. Additional research is needed to determine why they are not preferred, what might be modified, and how to integrate Vis in the future once it's possible to choose between formats.	1	1.5	1.5	1	0	2	1	1
Mohanty et al.	Virtual interviews in neurosurgery resident selection-A work in progress	2021	residency	neurosurgery	USA	Neurosurgery applicants and interviewers were surveyed during the 2020-21 match cycle to assess their satisfaction with VIs.	To evaluate applicant and interviewer satisfaction with Vis.	N/A	Quantitative	Survey	Before Match	118 applicants (RR 46.3%), 171 faculty interviewers (RR unknown)	Satisfaction: Applicants / interviewers were largely satisfied concerning VIs, even though they found them less effective. Fit: Some components of fit could be assessed, but others could not. Cost: The majority of applicants / interviewers agreed VIs were more time efficient and economical. Preference / Future: Both preferred IPIs, however, noted opportunities to incorporate VIs in the future (e.…	Satisfaction: 56.1% of faculty agreed/strongly agreed that they were satisfied with VIs overall. However, sentiments were mixed concerning whether VIs were as effective as IPIs. Fit: Faculty agreed/strongly agreed that VI were effective in evaluation of applicants competence (53.8%) and personality-interpersonal skills (58.5%), but only smaller proportion greed / strongly agreed VIs were effectiv…	Satisfaction: 48% of applicants agreed or strongly agreed they were satisfied with VIs, 34% were neutral and 18% disagreed or strongly disagreed. Fit: 75% of applicants agreed or strongly agreed VIs were an effective way to evaluate a program's curriculum. However, 75% disagreed or strongly disagreed that VIs were effective for evaluating a program's location, 46.6% disagreed or strongly disagree…	N/A	46.6% applied to more programs than they planned because of VI. 35.6% accepted more interviews than they planned because of VI.	N/A	N/A	87.7% of faculty agreed / strongly agreed Vis were more convenient. 92.3% of applicants agreed or strongly agreed VIs were more time-efficient and 96.7% felt they were more economically convenient.	N/A	Prior to COVID, neurosurgery was ranked by residents as the least conducive specialty for conducting VIs due to the importance of fit in small NS programs that are long and rigorous. Notably in this study, faculty interviewers and applicants felt similarly about many of the strengths and weaknesses of VIs (time efficiency, satisfaction with the overall process, ability to get to know applicants /…	VIs likely improve equity in the interview process.	1) Response bias. Surveys were post-encounter and were voluntary. Non-responders may have had different opinions. 2) Low response rate.	Though the transition to VIs in 20-21 was rapid and unexpected, most faculty & applicants reported positive experiences & found VIs to be an effective means of evaluating applicants & programs respectively. Although some things are better assessed in person, VIs have the benefit of decreased cost & time, and using VIs in the future might help eliminate inequities.	Possible uses of VI in the future: 1) May be used when mutual knowledge between applicant and program already exists (e.g., for away rotators); 2) May be used to screen larger pools of applicants then invite a more limited number for IPIs; 3) VI be used initially for all applicants, followed by second looks that have no influence on PD ranking. To ensure interviews can be distributed more evenly …	1	1.5	0.5	1	0	1	1	1
Moran et al.	Should radiology residency interviews remain virtual? Results of a multi-institutional survey inform the debate	2021	residency	radiology	USA	Survey of PDs and applicants in radiology to examine participant demographics, experiences with technology, perspectives on VIs, and attitudes towards proposed changes in the interview process.	To characterize the logistical and subjective experiences of both PDs and applicants of the first VI cycle, to identify the challenges and concerns related to VIs, and to inform the critical and polarizing debate regarding the perpetuation of VIs.	88% used Zoom, program selection committee members were evenly divided between use of home / office. 85% of applicants interviewed from home. A few reduced the number of interviews per candidate or shortened interviews.	Quantitative	Survey, Cost analysis, Match analysis	After Match, before arrival in program	25 PDs (RR 74%), 84 applicants (RR 45%)	Satisfaction: The majority of PDs and applicants described the VI season as very good. Preference: Both PDs and applicants agreed the benefits of VIs outweighed the drawbacks. The majority of applicants support VIs in the future, however, PDs were evenly split (~1/3 prefer IP, 1/3 neutral, 1/3 prefer VIs). Confidence: PDs had less confidence filling out rank lists. Ranking: Most PDs noted rank li…	Satisfaction: VIs were overall excellent (28%), very good (52%), fair (20%). PDs strongly agreed or agreed with the statements: I was able to concentrate and stay engaged during the VI (72%); we interviewed more candidates than we needed to (68%); and I was able to get a feel for a candidate’s character and goals (68%). However, PDs lacked confidence creating rank lists not having met the candida…	Satisfaction: VIs were overall excellent (26%), very good (50%), fair (24%); Applicants agreed or strongly agreed with the statements: I was able to represent myself positively during VIs (93%) and I felt I was able to present myself accurately during VIs (86%). Applicants disagreed with the statement: I was reluctant to rank programs in cities with which I was not familiar” (31%). Strengths and …	Technical difficulties were minimal or absent (80% PDs, 70% applicants), though when they did occur they were a source of stress. 76% of PDs increased the number of interview slots (adding more days or more slots / day). Applicants were able to apply to more programs (74%) and did not feel compelled to cancel any interviews (58%). Some applicants felt compelled to interview at too many programs (…	The majority of PDs (60%) and applicants (57%) supported caps on the number of applications. 72% of PDs and 60% of applicants supported preference signaling. 76% of PDs and 78% of applicants supported a standardized date for interview release. 80% of PDs and 88% of applicants favored a standardized date for programs to release their final status. 72% of PDs and 77% of applicants supported allowin…	Virtual conferencing technology influenced applicant rank lists, minimally or not at all (89%). 92% of PDs said their rank order lists performed the same or better (64% about the same, 28% better).	N/A	ERAS fees averaged $2,462 (range $200 - 8,500). Other fees averaged $358 (range $0 - $5,500, median $100), including technology enhancements, clothing, and background staging. Travel related cost savings were a substantial benefit to financial well-being of applicants (93%).	A majority of the applicants (70%) and PDs (76%) feel VIs reduce radiology’s contribution to climate change, and of these respondents, nearly half felt very strongly about VI’s impact on climate change.	Both PDs and applicants rated VIs highly and felt the benefits (costs, flexibility, accessibility, equity, wellbeing, carbon footprint) outweighed the drawbacks (assessing fit). Applicants strongly support VIs in the future, however, PDs were split on whether to return to IPIs (~1/3 in favor, 1/3 neutral, 1/3 opposed). This may reflect opposing views on collective vs personal interest, and may be…	During VIs, "off screen" time is important to build in. Proposed mechanisms for application control measures are broadly supported. The majority of PDs (60%) and applicants (57%) supported caps on the number of applications that applicants can submit. With respect to preference signaling, a system by which applicants can convey to programs their sincere interest by transmitting to them one of the…	1) Study may be constrained by self-selection bias - those with an interest in the survey topic and sufficient time are more likely to have completed the survey. 2) The survey was distributed after Match Day 2021, and thus responses may be influenced by recall bias wherein participants are more or less likely to recall information depending on their match outcome. 3) An identification verificatio…	Despite initial concerns, VIs were operationally feasible, with rank order lists performing on par or better than years prior for 92% programs. Residency applicants and PDs alike agreed that the overall benefits of the VI season outweighed the drawbacks. Applicants’ responses, which indicate a sense of increased well-being from the benefits of VIs, support efforts to make VIs permanent more stron…	Serious consideration should be given to the methods of preference signaling, application caps, and coordinated release of interview and final status dates.	1.5	1.5	0.5	1	0	2	1	1
Mulcahy et al.	Did more otolaryngology residency applicants match at their home institutions in 2021? Investigating the impact of the COVID-19 pandemic	2022	residency	otolaryngology	USA	Match analysis conducted examining publicly available data for the 2016-20 and 2021 ENT match.	To compare the proportion of applicants who matched at their home ENT program during the COVID-19 pandemic compared to the previous 5 years	N/A	Quantitative	Match analysis	After Match, before arrival in program	Total 1885 applicants: 308 in 2016, 307 in 2018, 306 in 2018, 319 in 2019, 326 in 2020, and 319 in 2021	Match outcomes: 2021 applicants in ENT had higher rate of home matches compared to aggregated 2016-2020 data.	N/A	N/A	N/A	N/A	N/A	2021 30.1% of ENT residents Home Matched vs. 2020 19.3%, 2019 22.9%, 2018 16.3%, 2017 19.2%, 2016 16.9% (Average of 2016-20 = 18.9%) - all differences were significant.	N/A	N/A	Nearly 1/3 of all applicants matched at their home program. The severely limited away rotations and VIs were likely the major contributing factors. Students in 2021 had few connections outside of their home programs. Applicants in ENT are extremely competitive, and away rotations are a significant way of differentiating. Virtual away rotations and virtual mentorship experiences (both innovations …	N/A	1) This study doesn't account for applicants who completed 1-2 yr clinical research fellowships - they may be more likely to match at that institution for residency, which is very similar to a home match; 2) Some medical schools have affiliations with ENT programs that are not technically part of the same institution and students rotate at these affiliated institutions as “home rotators.”	Nearly 1/3 of 2021 residents matched at their home institution for ENT residency in the 2021 cycle, a significant increase due to COVID. While the causes of this effect are likely multifactorial limited away rotations likely played a significant role.	Long term prospective studies are warranted to follow this trend (i.e., Was 2021 an anomaly? Will the resumption of 1 away rotation in 2022 mitigate this effect?) The ways in which programs use away rotations and research fellowships, as well as virtual experiences to determine applicant rankings will need further exploration. Increasing emphasis on away rotations and prolonged research experienc…	2	1.5	1.5	3	N/A	2	1	2
Mulligan et al.	The 2021 neurosurgery match: An analysis of the impact of virtual interviewing and other COVID-19 related changes	2021	residency	neurosurgery	USA	Match analysis conducted examining publicly available data for the 2016-20 and 2021 neurosurgery match.	To assess the extent to which VIs and elimination of away rotations affected match outcomes in the 2021 neurosurgery match and whether medical school ranking, IMG status or affiliation with a home neurosurgery program affected match outcomes.	N/A	Quantitative	Match analysis	After Match, before arrival in program	Total 1324 applicants: 1113 from 2016-2020 (99.1%) and 211 from 2021 (90.2%)	Match outcomes: 2021 applicants in neurosurgery had no significant differences in home program, within state or within region match rates. The proportions of IMGs and students without home programs among matched graduates were unchanged.	N/A	N/A	N/A	N/A	N/A	2021 vs 2016-2020 home match, same state and same region proportions were not significantly different: home match 19.3% vs 19.8% (p=0.94), same state 23.6% vs. 27% (p=0.35), same region 42.5% vs 49.2% (p=0.11). When stratified by medical school ranking, students graduating from the top 25 ranked schools matched within the same region at significantly lower frequencies: 50.7% (2016-20) vs. 32.8% (…	N/A	N/A	No significant changes occurred overall in home/geographical match rates in 2021, despite significant concerns. The proportions of IMGs and students without home programs among matched graduates did not change. These results show a preliminary neutral outcome for VIs and suspended away rotations, though rates of attrition resulting from a "poor fit" will not be known for another 2-3 years. Applic…	N/A	1) A small number of programs didn't comply with guidelines to cancel away rotations, 2) both USNWR and Doximty rankings have capricious scales for evaluating match outcomes, and neither metric can fully capture applicant or program success, 3) rankings can shift annually according to reputation, research productivity, and research endowment, 4) demographic information on applicants was not avail…	Despite potential disadvantages, little changed in match patterns with VIs and no away rotations. No geographic limitations, or changes in match rates for IMGs or those without a home neurosurgery program were seen. The only significant change was increased geographic dispersal of candidates from elite (Top 25) programs, perhaps due to increased importance of medical school origin. These findings…	The strengths and weaknesses, as well as what remains "unaffected" by Vis will need to be weighed to make decisions about future application cycles. Future studies should aim to examine URiM outcomes more explicitly. Equity of access must be considered in future plans.	2	1.5	1.5	3	N/A	2	1	2
Om & Losken	Effect of COVID-19 on geographic distribution of the integrated plastic surgery match	2021	residency	plastic surgery	USA	Match analysis conducted examining publicly available data for the 2015-2020 and 2021 integrated plastic surgery match.	To determine the effects of COVID-19 on the geographic distribution of the plastic surgery match.	N/A	Quantitative	Match analysis	After Match, before arrival in program	Total 1015 applicants: 127 from 2015, 144 from 2016, 149 from 2017, 154 from 2018, 151 from 2019, 143 from 2020, 147 from 2021	Match outcomes: 2021 applicants in plastic surgery had higher rates of home matches compared to aggregated 2015-2020 data.	N/A	N/A	N/A	N/A	N/A	2021 home match 25.1% vs. 2015-2020 16.7% (p=0.0012). Odds ratio of matching at home institution in 2021 compared with those in prior years was 1.68. There was no statistically significant difference between the percentage of “in state matches” or “in region matches” (p>0.05).	N/A	N/A	Although multiple factors may be involved in geographic distributions of residency match outcomes, the results of this study suggest that COVID-19 restrictions on travel and exposure to outside programs may have contributed to higher percentages of matches within the same institution. Programs that no longer had exposure to visiting medical students may have favored students with whom they were f…	N/A	1) Included only programs with publicly available data and may be subject to sampling bias, 2) study did not assess all factors that may influence geographic distribution of match outcomes, including applicant competitiveness, hometowns, or other personal connections, 3) this study included data only from plastic surgery and may not be extrapolated to other surgical subspecialties.	Increased emphasis on home match in the absence of away rotations/VIs. Further analysis of data may elucidate other match statistics affected by COVID-19, such as number of interviews or number of programs ranked. Objective data that provide transparency on match outcomes may help both applicants and program directors navigate the uncertainty of residency match in post COVID-19 years.	Match rates may continue to be skewed towards home matches if efforts to make personal connections and allow for IP assessments aren't enhanced.	2	1.5	1.5	3	N/A	2	1	2
Peyser et al.	Virtual obstetrics and gynecology fellowship interviews during the coronavirus disease 2019 (COVID-19) pandemic: a survey study	2021	fellowship	Multiple obstetrics and gynecology	USA	Cross-sectional survey of attending and fellow interviewers across 5 different OB GYN specialties at single academic institution following the 2020–21 season to assess perceptions and satisfaction with VIs.	To describe experiences with virtual OB GYN fellowship interviews for the 2020-21 cycle, and to determine feasibility for future use.	All used Zoom. VI format varied. Attending to applicant VI ratios were !:1 (1 program), 2:1 (2), 3:1 (1), and various (1). All specialties had fellows meet separately with applicants for a Q&A session or formal interviews with all fellows. Interviews lasted 15–20 min (60%) or 30 min (40%). Three groups had no breaks, two had 5–10 min breaks. For the program intro, two used recorded videos with a …	Quantitative	Survey	Before Match	36 faculty interviewers (RR 68%), 18 fellows and 18 attendings	Fit: Overall, interviewers felt applicants were able to convey themselves via VI. Confidence: Attendings more likely than fellows to feel confident in their assessment of applicants by VI. Strengths / Weaknesses: Financial and time savings for applicants considered largest benefit of VI; less social interactions and lack of facility tour the biggest weaknesses. Other: VIs considered more importan…	The most important factor for evaluating the overall quality of applicants was the VI (66%). Other factors mattered less (direct conversations with attendings at home institutions (14%), application (11%), LORs (9%)). Fit: Interviewers agreed / strongly agreed applicants conveyed themselves well (92%) and they obtained an adequate assessment (84%). Confidence: Attendings were more likely than fel…	N/A	N/A	N/A	N/A	N/A	N/A	N/A	VIs were effective, as a majority of interviewers felt that they were able to adequately assess candidates. In addition, most recommended future use of VIs. The lessons learned will be valuable in providing guidance to the planning processes for VIs should they continue. VIs offer several advantages, with lower costs for applicants and programs, increased scheduling flexibility, and mitigation of…	All programs used Zoom with no technical issues. Programs used various modes of introducing the program, and in other studies the live session has been shown to offer greater interaction with applicants and the PD. Strategies to optimize interaction (live sessions with PDs, fellows) and enhance knowledge transfer about the program and its culture (pre-recorded videos and website information) are …	1) Applicant perspectives were not assessed. 2) Survey conducted before the match. 3) Recall bias. 4) Small sample size. 5) Limited to a single institution.	Unprecedented times have impacted the format of residency and fellowship interviews, and the adoption of new interview protocols moving forward may be warranted. Based on the survey results, OB GYN fellowships found VIs efficient with the majority recommending future use. As fellowship matches become increasingly competitive, VIs may be a key tool to alleviate the burdens of IPIs and expand the g…	VIs are effective and should be strongly considered for future use. Future studies across a greater number of institutions among various geographical regions are needed. Virtual tours are likely "expensive" in terms of yield on investment for small programs, but are needed if Vis continue. Some issues such as tours / interpersonal interactions could be addressed with a hybrid model with IP visits…	1	0.5	1	1	1	2	1	1
Rajesh et al.	The virtual interview experience for MATCH 2021: A pilot survey of general surgery residency program directors	2021	residency	surgery	USA	Program directors were surveyed using closed and open ended questions about the cost-time benefit of VIs, ability to assess candidates through VIs, and their thoughts on the future of VIs for evaluating residency applicants.	To determine the perspectives of general surgery PDs on the benefits and drawbacks of VIs, and the feasibility / utility of Vis in future years.	N/A	Quantitative Qualitative	Survey	Unclear, but before arrival in program	60 PDs (RR 21%)	Fit: The majority of PDs found it hard to assess fit, personality & communication skills, commitment to the specialty and ability to function as a resident virtually. Cost: cost to programs was lower. Preference / Future: PDs preferred IPIs, though a majority would use a hybrid model in the future.	Fit: 75% of PDs disagreed VIs made it easier to assess an applicant's fit with the program & the remainder were neutral. 69% disagreed VIs made it easier to assess personality & communication skills, 25% were neutral. 57% PDs disagreed VIs made it easier to assess applicant's commitment to specialty & ability to function as resident w/ 42% neutral. 44% PDs agreed and 26% disagreed VIs made select…	N/A	Technical difficulties were rare (10.9% of interviews)	N/A	N/A	N/A	93% PDs agreed VIs were less expensive, but only 35% of PDs found VIs to be less time-consuming. Average cost savings reported by PDs was $6462. The median cost saved was US $4500 ($1625 – 10,000).	N/A	VIs only moderately saved on cost for programs, though applicant savings were considerable. PDs lacked consensus on whether VIs saved time (though perceptions of efficiency may have been affected by lack of familiarity & need for tech support that may dissipate in future cycles). VIs were not good for assessing fit or commitment, and commitment is critically important in General Surgery as there …	VIs unable to replace some of the perceived value of IP interactions in assessing applicants, resulting in more emphasis on objective data.	1) Low response rate. 2) Did not assess & differentiate responses based on geographic location & type of residency (community vs academic), which could have implications on resources available to organize and support VIs. 3) Did not assess applicant perceptions.	The VI format was quickly imbibed by all residency programs and many aspects of the experience were positive. VIs provide cost savings but are associated with ongoing concerns about the ability to assess fit. The surgical education community will need to monitor resident recruitment outcomes and attrition over time to identify best practices for conducting VIs and to figure out how to best re-inc…	Longer term studies are needed to determine if the VI format results in any higher rates of attrition from residencies, as this is already a problem in general surgery. Programs may offer VIs as part of a screening process for a larger applicant pool and then short-list their highly desired candidates for an IP visit. Alternatively, VIs could be offered exclusive of IPIs based on either applicant…	1	1.5	0.5	1	1	1	1	1
Rasendran et al.	The impact of virtual interviews on the geographic distribution of ophthalmology match results in the 2020-2021 cycle	2021	residency	ophthalmology	USA	Match analysis conducted examining publicly available data for the 2016-19 and 2021 ophthalmology match.	To evaluate whether VIs impacted regional/home match rates in ophthalmology; To provide insight into the effects of VIs for future application cycles.	N/A	Quantitative	Match analysis	After Match, before arrival in program	375 applicants in 2021 (RR 75%), 1190 in 2016-2019 (RR 78.3%)	Match outcomes: 2021 applicants in ophthalmology had higher rates of home matches compared to aggregated 2016-2019 data.	N/A	N/A	N/A	N/A	N/A	Applicants were more likely during the 2020 to 2021 cycle to match at a residency program affiliated with their home medical school than in previous cycles (23 vs. 18%, p=0.03). When comparing 2020 to 2021 and 2016 to 2019 applicants by region, similar proportions of medical students in each region stayed in the same region for residency.	N/A	N/A	VIs did not alter the likelihood of medical students staying in the same region or state as their medical school. However, there was a higher likelihood of ophthalmology applicants matching at residency programs at institutions affiliated with their medical schools. Lastly, there was no difference in the proportion of matched applicants that attended osteopathic or international medical schools, …	N/A	1) this study depended on publicly available data, 2) medical students may have other connections to a residency program such as attending an undergraduate university or growing up in the same region.	No difference in geographical distribution, but higher rate of home match with no away rotations and VIs. IPIs and away rotations pose a significant financial burden on applicants. However, IPIs and away rotations enable applicants to form important social connections with both faculty and potential future coresidents, as well as allow them to assess overall culture, fit, and camaraderie of the p…	Costs and skewed distributions of home matching will need to be weighed in balance against preferences for IPIs to assess fit. Hybrid options may be considered in the future, though they must address concerns that those who select IP over VIs may appear "more dedicated".	2	1.5	1.5	3	N/A	2	1	2
Ream & Thompson-Stone	Virtual residency interview experience: The child neurology residency program perspective	2022	residency	child neurology	USA	Survey with closed and open ended questions to explore PD, program coordinator and chief resident perspectives concerning VIs during the 2020-21 residency recruitment season. The study explored (1) whether applicants would apply to more programs, (2) the most ideal timing and components of the interview day including what content should be delivered live versus prerecorded, (3) what impact there …	To better define the experience of child neurology residency programs with VIs during the 2020-21 residency recruitment season.	The interview days were coordinated with pediatrics interviews in 23 of 33 programs (either same day or consecutive days). The interview day contained a variety of activities, with the most common being an opportunity to meet residents and a program overview presentation. The majority of VIs were single-day experiences that ranged from <5 hours (four programs) to eight to nine hours (three progra…	Quantitative Qualitative	Surveys	After Match, before arrival in program	35 PDs (RR 46%), 34 PCs (RR 45%), and 15 chief residents	Fit: PDs could adequately assess most applicant qualities but felt that VIs limited their ability to assess applicants' interpersonal communication skills. The majority of PDs felt VIs had a negative impact on their program's ability to highlight its unique qualities. Ranking: Despite the impression of lower quality interview interactions, interviews were of similar importance in determining the …	Fit: virtual and IPIs were similar for assessing applicant qualities, with the exception of IPIs being better for assessing interpersonal skills. PDs (74%) felt VIs had a negative impact on the program's ability to highlight its unique qualities. Ranking: Interviews remained of similar importance in ranking, despite these difficulties. quality of social interaction in a virtual platform was infer…	n/a	14 (40%) programs reported receiving greater than 10% more applications. Applicant quality was similar to (n = 18) or better (n = 14) than previous years. PCs reported fewer cancelled interviews, and those that were cancelled were easier to fill. PDs were more likely to report use of standardized questions during interviews in 2020-2021 than in the previous year, but the majority of programs (20/…	N/A	PCs reported that 26% ranked 10% more applicants than the previous year.	N/A	N/A	N/A	Application inflation: Programs saw an overall increase in the # of applications, likely due to the lack of extrinsic limitations on accepting interview offers such as time and money. In response, programs increased the number of individuals that they interviewed. Increasing the number of interviews is particularly difficult for child neurology because of the coordination required with pediatrics…	When asked about preferences for future recruitment formats, the majority of respondents in all groups recommended having a combination format in which individual applicants would have both virtual and IP experiences. The use of small breakout rooms seemed to be helpful, but overall, the quality of applicant-resident interactions was likely a major drawback to VIs for both programs and applicants.	1) To maximize survey completion, only 10 questions were asked of each group, limiting the information obtained. 2) Contact information was not up to date impacting response rates. 3) Response rates were high for PD and PCs, but were low for chief residents and thus may not be generalizable. 4) Sample size was small.	If VIs persist, programs may need to consider increasing the number of applicants interviewed as applicants may continue to apply to more programs. Programs may need to rethink how to structure interactions with residents to make them more useful and personal. VIs limit some aspects of programs' and applicants' assessments of each other, although there are also advantages.	Vis have tradeoffs. Hybrid models warrant future exploration. Overapplication and the need to increase numbers of interviews highlight the need for application control measures.	1	1.5	0.5	1	1	1	1	1
Rhoades et al.	Maternal-fetal medicine program director experience of exclusive virtual interviewing during the coronavirus disease 2019 pandemic	2021	fellowship	maternal-fetal medicine	USA	Cross-sectional nationwide survey of maternal-fetal medicine (MFM) PDs about the VI experience.	To evaluate the VI experience in comparison with previous IP cycles. To assess MFM fellowship PDs’ approaches to VIs and obtain PD feedback on the VI experience to determine optimal approach to fellowship interviews in future years outside of a pandemic.	Zoom (92%), WebEx (6%), and Microsoft Teams, Thalamus, & E-posterboards (< 1% each). Duration of Interview day: < 2 hrs (3%), 3 hrs (23%), 4 hrs (48%), five hours (18%), > six hrs (9%). 44% hosted a virtual social event; 100% involved fellows, 19% faculty, 7% involved residents, 3% faculty of other divisions or departments. 87% held socials the night before VI. Social duration: 30-59 min (23%), 1…	Quantitative	Survey	Before Match	71 PDs (RR 80%)	Satisfaction: Most were satisfied overall with VI experience overall. Fit: More difficult to accurately represent program and get to know applicant and assess fit. Future: Near equal preference for hybrid, exclusively IP, or exclusively VIs. Application inflation: A number of PDs increased # applicants interviewed out of concern of not filling due to the effects on program and applicant trends wi…	Satisfaction: Overall experience with VIs as expected [10%], slightly better or better than expected [90%.]. Fit: Ability to provide comprehensive and accurate representation of program by VI compared to IP; minimally, moderately, or significantly less than IP [65%], the same [23%], minimally, moderately, or significantly more than IP [13%]. Ability to get to know candidates and assess fit; minim…	N/A	Comparison of materials / events used in 2019 vs 20: virtual social event [1% vs 44%], IP social event [58% vs 0%], mailed physical welcome package [11% vs 37%], electronic materials or links about your institution or city [44% vs76%], pre-recorded program overview presentation [1% vs 18%], live program overview presentation [82% vs 68%], pre-recorded virtual tour [3% vs 49%], live virtual tour […	Number of candidates interviewed per fellowship position [mean, SD] trended up; 2019 [19.4, 6.5], 2020 [21.3, 7.8] p < 0.1. 49% interviewed more candidates in 2020. The mean number of additional candidates per position was 5.8. [SD 3.8]. Reasons for interviewing more: risk of not filling due to more interviews per candidate [49%], risk of not filling positions due to not showcasing well virtually…	N/A	N/A	N/A	N/A	PDs were able to adapt quickly to VIs and overall felt their experiences were better than expected. However, despite effectiveness / efficiency - most felt they couldn't adequately portray their program virtually or get to know the candidates as well. These findings are consistent with those from other OB GYN subspecialties. VIs are cost effective and efficient and it may be reasonable to have th…	Zoom or any platform familiar to applicants is likely fine. Optimal amount of time spent on VI unknown, but important to minimize "virtual meeting fatigue" and there is likely a point beyond which little additional benefit is achieved.	1) Data collected before the match and unable to assess match outcomes. 2) Demographic data not collected. 3) Survey limited to MFM subspecialty.	This study provides a thorough assessment of the PD experience with the unanticipated 2020 VIs for MFM fellowship training programs. Given the circumstances, it is encouraging that most PDs found the experience satisfactory. There is interest among PDs in moving forward with a component of VIs in the future. This data can help to guide creation of potential innovative, streamlined interview proce…	Future research should focus on refinement of the ideal approach to VIs to optimize candidate and PD abilities to gather necessary information to make informed decisions. The ideal length of the interviews and interview day, the use and format of a virtual social event, and type and format of supplementary materials can all be further evaluated and optimized. A future review focused on peri-inter…	1	1.5	1.5	1	1	2	1	1
Robinson et al.	A comparison between in-person and virtual fellowship interviews during the COVID-19 pandemic	2021	fellowship	cardiothoracic surgery	USA	Cross-sectional survey of PDs and applicants, who participated in a mix of VI and IPIs during the 2019-20 cardiothoracic surgery fellowship match season as it was disrupted midway by COVID.	To synthesize the opinions of applicants and PDs on VI and IPIs, to provide guidance in transforming the way fellowship interviews are conducted in the future when travel can resume.	53% of program offered 1:1 interviews. and 53% of programs used 4 or more VIs. 85% of programs had a scheduled time to meet with current fellows and residents and 26% of programs offered virtual tours.	Quantitative Qualitative	Survey	After Match, before arrival in program	66 PDs (RR 55%), 46 applicants (RR 44%)	Format: Applicants prefer > 4, 1:1 interviews, time to meet with current fellows, and a tour (tour virtual tours were not that helpful). Fit: Concern that couldn't "connect" via VI (both PDs and Applicants. Cost: VIs save significant amounts of money. Application inflation: applicants completed more interviews virtually because they could. Rank: Interview format didn't influence top ranked progra…	Fit: 65% felt the lack of personal interaction limited the ability to fully convey the program’s strengths and appeal to the applicants. 50% felt they were unable to connect as well virtually as IP. Future: 79% of PDs agreed or strongly agreed that VIs should be offered in the future. However, just 15% of PDs agreed or strongly agreed that VIs should be offered without the option of an IPI. 39% a…	Fit: 44% felt the lack of personal interaction limited their ability to fully convey their strengths and appeal to the program. 61% felt they were unable to connect as well as IP. Most agreed or strongly agreed they missed exploring the surrounding city, having casual time with fellows and residents, meeting more people and faculty. Future: 55% of applicants either agreed or strongly agreed that …	Format: 73% preferred a single interviewer at a time. 85% agreed or strongly agreed talking to fellows was an important component to their overall program impression during VIs. 87.5% preferred 4 or more VI sessions. 61% of applicants who did not experience a virtual tour agreed or strongly agreed that they missed having a hospital tour. For those applicants who experienced a virtual tour, only 2…	47% of applicants reported completed additional interviews to the number they had originally planned to attend due to the wide usage of Vis (mean 2.5 additional interviews).	Applicants and PDs who interviewed both IP and virtually reported whether their first and second rank preferences resulted from an IPI, VI (without previous IP exposure) or VI (with previous IP exposure). After considering the percent of VIs completed, a similar percent of both applicants and PDs made their top-ranked choices from interviews that were conducted virtually.	56% of applicants matched at a fellowship where they interviewed IP. For those who matched at a program where they interviewed IP compared to virtually, there was no statistical difference between the percent of interviews completed IP (62.8% vs 60.7%, p = 0.641). 55% of fellowship positions were filled by an applicant from an IPI. 62.9% of the interviews occurred IP. Programs that matched IP app…	Median cost of travel and lodging for one IPI was reported as $600 (interquartile range 500-725) for applicants.	N/A	While the majority of applicants and PDs felt that VIs should be continued in the future, most did not think that VIs should be a complete replacement for IPIs. Most did not feel VIs negatively impacted their chance of matching at the top of their rank list and this was supported by data - after considering the percent of VIs completed, a similar percent of both applicants and PDs made their top-…	Applicants provided specific information on several areas in which they thought VIs were lacking or “missed” components of traditional interviews that could provide PDs opportunities to improve the structure and quality of future VIs. For example, a VI day could be constructed to include open interaction or private sessions with current fellows program. Likewise, applicants preferred more robust …	1) Not randomized, done sequentially with IPIs followed by VIs. 2) Universal appreciation that adaptability to the COVID pandemic was required may have influenced responses. 3) Low response rates. 4) Non response bias. 5) Some applicants didn't report their match status, and f there were a disproportionate number of matched applicants responding, outcomes may be biased. 6) Findings may not be tra…	This forced adoption of new VI protocols does suggest some concrete best practices for future interview seasons. Reform of the interview process to allow equitable access for applicants and optimized evaluation by programs is an ongoing goal. The lessons learned from ad hoc adaptation in this extraordinary time should help with improvement of the interview process going forward.	Discomfort persists in giving up IPI entirely and future cycles should explore the ideal hybrid format. This study does outline some best practices related to VI formats, including 4 or more 1:1 interviews, and sessions to interact with current fellows. Applicants will complete more interviews virtually because of convenience and low cost if they are not capped.	1	1.5	0.5	1	0	2	1	1
Rockney et al.	Virtual recruitment is here to stay: A survey of ID fellowship program directors and matched applicants regarding their 2020 virtual recruitment experiences	2021	fellowship	infectious disease	USA	Nationwide cross-sectional survey of infectious disease fellowship PDs and applicants that included quantitative and free text items subjected to a quantitative content analysis.	To understand the impact of virtual recruitment on the number of applications received by programs, the number of interviews offered and conducted, and the recruitment resources developed by programs; To understand the number of programs to which applicants applied and interviewed and applicants’ perspectives on discrete components of virtual recruitment.	N/A	Quantitative Qualitative	Survey	After Match, before arrival in program	68 PDs (RR 43%), 85 applicants (RR 23%)	Format: Consensus emerged around the ideal interview day format: 3-4 interviews, lasting <30 min each, with 5-9 minute breaks in between, with a single consolidated interview day lasting 3-5 hours. Fit: VIs worked sufficiently, but neither applicants nor PDs felt they were as good as IPI to get to know applicants or showcase the program. Cost: Half of programs spent $0, and most the rest spent <$…	Fit: Nearly all (94%) of PDs were able to sufficiently learn about each candidate virtually [(48%) equally well as IP, (39%) sufficiently but not as well as IP, and 4 (6%) better than IP]. Most PDs (75%) felt they were either unable to adequately showcase their program (12%) or adequately but less well than with IP (62%). Only 25% of PDs felt they were able to showcase their program as well as or…	Format: Ideal number of interviews per day 2 (6%), 3 (38%), 4 (45%), 5 (7%), 6-7 (4%); Ideal interview duration: <30 min (64%), 30-39 min (32%), 40-49 min (4%); Ideal VI day duration: 1-2 hrs (3%), 2-3 hrs (8%), 3-4 hrs (41%), 4-5 hrs (36%), 5-6 hrs (8%), 6-7 hrs (4%). Majority (66%) preferred 5–9 minutes breaks between interviews. Nearly all (89%) matched applicants preferred a single, consolida…	Programs generated, modified, or maintained online recruitment-related content. Program overview videos, virtual tours of the hospital / university / clinical sites, presentations / testimonials from fellows & faculty, and technical support resources were the most common newly created materials. Website modifications focused on current fellows & alumni, program structure / clinical rotations / re…	Programs: PDs reported a 27% increase in the number of applications 89 vs 70 p = 0.03, a 23% increase in interviews offered 42 vs 34 p = < 0.01, and a 45% increase in applicants interviewed 35 vs 24 p <0 .01. The percentage of applicants invited to interview remained constant p = <0 .419. The percentage of invited applicants who completed interviews increased 81% vs 68% p < 0.01. Majority (72%) o…	N/A	N/A	Additional cost to programs; $0 (51%), < $100 (4%), $100 - $249 (9%), $250 - $499 (7%), $500 - $999 (11%), > $1000 (18%).		Survey data and the Match results indicate successful virtual fellowship recruitment. Applicants’ views regarding essential aspects of programs’ online portfolios and their preference for interview days (3-4 interviews, lasting < 30 minutes, with a total day duration of 3-5 hrs) should help inform future recruitment efforts. Majority of PDs and matched applicants preferred IP recruitment but most…	While all online resources were helpful to some proportion of matched applicants, some were rated as critically or very important by at least 60% of applicants, including prose- and photo-based content on program structure, PD program overview video, prose- and photo-based content on didactics and curriculum, and fellow testimonials and profiles. Programs planning to revise, update, or newly crea…	1) Low response rate; 2) Nonresponse bias; 3) Demographics of respondents unknown; 4) Applicants only go through the match once - and thus as a cross- sectional survey, direct comparisons of VI and IP interviews cannot be made.	Survey data and the Match results indicate a remarkably successful virtual fellowship recruitment. Virtual recruitment is likely here to stay in some capacity and applicants’ views regarding essential aspects of programs’ online portfolios and their preference for time-limited interview days should help inform future recruitment efforts to the benefit of programs and applicants alike.	PDs are urged to consider how they will accommodate a mixture of IP and virtual recruitment once the former again becomes possible. Future research efforts should study the perceptions and ramifications of hybrid IP and virtual recruitment seasons, including strategies for mitigating bias for or against applicants who choose one interview format over the other, as well as cost considerations for …	1	1.5	0.5	1	1	2	1	1
Romano et al.	Optimizing the residency application process: insights from neurological surgery during the pandemic virtual application cycle	2022	residency	neurosurgery	USA	Survey of neurosurgery residency program leaders (PDs and chairs), program administrators (PAs), and applicants to evaluate perceptions of the 2020–2021 virtual match cycle on various stakeholders, and to explore potential strategies to improve future match cycles.	To describe the impact of the COVID-19 virtual match cycle and to discuss approaches to optimize future cycles through applicant and neurosurgical education leadership insights.	N/A	Quantitative	Survey	After Match, before arrival in program	119 program leaders (RR 51.7%), 77 program administrators (RR 67%), 124 applicants (RR 44.3%)	Fit: Applicants and program leaders felt it was more difficult to assess fit virtually. Cost: Applicants had more equitable access due to less financial and time burdens. Preferences / Future: PDs & Chairs, and Program Admins all preferred a hybrid model of IP + VIs for future application cycles. Rank outcomes: The majority of applicants ranked in their top 3 programs, and the depth programs went…	Fit: 74.8% of PDs/Chairs reported ability to assess “fit” or “personality” was somewhat worse or much worse than IP interviews. Preferences / Future: The #1 option preferred by PAs and program leaders was a "hybrid" future that offers both virtual and IPIs. The #2 option was an initial VI followed by an IP second look at select programs. The #3 option was all IPIs. The #4 option was all virtual.	Fit: 78.2% of applicants reported ability to assess 'fit' & 'culture' of program was somewhat worse or much worse than IP interviews.	93.3% of program leaders believed that a 4-week sub-I in neurosurgery at an applicant’s home institution was optimal vs an 8-week sub-I (6.7%) or multiple 2-week sub-Is (0%). 68.9% of program leaders indicated two, 4-week away rotations were optimal. Most program leaders did not use standardized interview questions (73.4%). 62.7% of program leaders found the standardized LOR template was somewhat…	Programs received more applications in 2020-21 (315 vs 283, p<0.0001). The number of interview days (3.8 vs 3.3, p<0.0001) and the number of applicants interviewed increased (45 vs 40, p=0.0003). The number interviewed off the wait list decreased (2.7 vs 3.3, p=0.0099). More than 50% of applicants applied to > 80 programs. 60% received ≤ 20 interview invitations, 9% received > 40. 65% completed u…	68.5% matched in their top 3-ranked programs and 93% matched in their top 10. 52.9% of matched residents were reported by their program to be within the same decile ranking as matched applicants in previous years, with 17.6% and 26.9% being higher and lower, respectively.	N/A	89.1% of PDs/Chairs found financial burden of the VI to be much less than IPIs. 75.7% indicated that ease of access was somewhat better or much better.	N/A	The findings confirm changes in the match process, with more interviews offered and more applications received. Survey data didn't identify any obvious impacts on match results, though programs & applicants reported VIs restricted important aspects of information exchange / ability to assess fit. One hybrid model gaining attention is an entirely VI process, with optional IP second looks to progra…	VIs have introduced new challenges related to application inflation. Interview caps, hybrid VIs w/ later IP visits to selected programs, preference signaling, and management of how interview offers are managed may further increase equity in the interview process.	1) Response bias. 2) Limited generalizability. 3) Methodology did not allow assessment of whether multiple responses were received from a single program. 4) Only students who uploaded an academic project video were included, possibly skewing the study population. 5) Self-reporting on ranking may lack veracity; however, there was a high correlation between applicant responses in this study and the…	In response to the pandemic, neurosurgery educational societies and programs tested various rotation, interview, and match strategies. The neurosurgery residency match in the future will likely include more uniform away rotation opportunities, standardized LORs, and hybrid interview formats. Capping of interviews & standardization of interview-release dates and procedures should be encouraged. Th…	VIs have introduced new challenges. Interview caps, hybrid Vis w/ later IP visits to selected programs, preference signaling, and management of how interview offers are managed may further increase equity in the interview process. Immediate and long-term effects of COVID-19 pandemic–related alterations to residency application cycle on various stakeholders merit further investigation to see if st…	1	1.5	0.5	1	0	2	1	1
Rosenbluth et al.	Survey of the 2020 Fellowship Council application and match process and the impact of COVID-19	2022	fellowship	advanced gastroenterology (GI), advanced GI minimally invasive surgery, bariatrics, endoscopy, hepatobiliary	USA	Survey of fellowship PDs and applicants with closed and open ended questions regarding preferences for virtual vs IPIs, associated costs and preferences for future practice.	To examine the perceptions of applicants and PDs regarding the impact of COVID-19 on the interview process, to compare expected versus actual resource / financial utilization, and to inquire about preferred future practices.	N/A	Quantitative Qualitative	Cost analysis, survey	Unclear, but before arrival in program	140 applicants (RR 53%), 55 programs (RR 38%)	Costs: Substantially reduced applicant costs and missed work days, moderately reduced program resource utilization. Confidence: The majority felt VIs were sufficiently informative for ranking. Preferences: In the future applicants preferred VIs over IPIs, whereas PDs preferred IPIs to VIs.	The vast majority (71%) of programs did all interviews virtually. 25% of programs did no VIs (some programs had completed IPIs prior to pandemic restrictions). Confidence: 84% felt adequate information for rank list. Future: 21% prefer Vis only, 38% favor virtual prior to IPIs, and 42% prefer IP only.	Only 30% of interviews completed IP. 27% did not complete any IPIs. Confidence: 90% felt IPIs sufficiently informative for rank list, 81% felt VIs sufficiently informative for rank list. Future: 44% preferred IP after VI, 29% preferred VI only, and 18% preferred IPI only.	N/A	N/A	N/A	N/A	The total expected costs was $4750 (range $2,000-6,000) or $536 ($330 - 863) per interview, while actual cost was $1000 ($250 - $2,250) or $125 ($41 - $250) per interview (P<0.05). Expected missed work days was 10 (range 5 - 16). Actual missed work days was 3 (p<0.05). Expected IP resources were 2.5 days with 4 faculty spending 5 hours per day. Instead, VI resources were 2 days, with 3 faculty me…	N/A	Overall, the VI process that was rapidly created was very successful. Both PDs and applicants felt that could glean sufficient information to make decisions. Applicants saved both time away from work and money. In a normal year, applicants might be expected to spend 7.4% of their annual income on IPIs, with VIs they spent less than 1.5%. Those with higher debt and less financial liquidity might n…	N/A	1) response bias of a voluntary survey; 2) recall bias; 3) applicants estimated / guessed what process would have been like in an ordinary year; 4) applicants and programs could only make educated guesses regarding whether they received adequate information to assess fit, as their fellowship cycle had not yet started.	VIs can give valuable information to applicants and programs and may ultimately be a good screening tool while significantly reducing costs and time away from work. This may help plan future interview cycles to optimize resource utilization and maximize benefits to applicants and programs.	Formats and platforms for Vis should be standardized. Costs (time, money, resources) should be considered in the future, particularly if sufficient information can be gleaned from VIs.	1	1.5	0.5	1	0	2	1	1
Sabesan et al.	Implementation and evaluation of virtual multiple mini interviews as a selection tool for entry into paediatric postgraduate training: A Queensland experience	2022	residency	pediatric	Australia	Queensland Basic Pediatric Training Network adopted a Virtual Multiple Mini Interviews (vMMIs) model for the selection of candidates for pediatric training in response to COVID-19 travel and social distancing restrictions of 2020. The vMMI replaced an IP MMI administered at a centralized location requiring travel to participate by both candidates and interviewers. A survey and focus groups were u…	To describe the implementation of vMMIs and to evaluate candidates’ and interviewers’ perceptions and experiences of vMMIs for the selection of candidates into pediatric training in Queensland, Australia; To analyze the differences in experiences of candidates living in Brisbane and the outer Brisbane region versus the experiences of regional and interstate candidates.	vMMIs administered on Zoom in similar format to IP. Interviewers had prior experience; calibrated to ensure inter-rater reliability. Interviewers were on site. Communication materials were sent in advance (e.g., Zoom instructions, contingency plans for tech failures). Candidate movement between vMMI stations was facilitated by a Host. At the start of a session, candidates were assigned to a ‘brie…	Mixed Methods	Survey, Focus groups	Before Match	78 applicants (RR 100%) participated in focus groups; (RR 58.7% to the survey).	Format: Virtual MMI (vMMI) is a feasible and acceptable method of selection into post graduate training. Pre-interview instructions, tech support important. Satisfaction: Most were happy to undertake vMMI in the future, with a minority feeling they would have performed better in IP. Strengths / Weaknesses: user-friendly IT platform, successful pre-interview communications, adequate preparation, c…	Preference: 60% of interviewers prefer vMMIs in the future, though 30% were neutral and 10% preferred IP. Format: Interviewers felt they were given adequate pre-interview instructions; the calibration session useful; actual interview process was acceptable; support on interview day adequate. Interviewers emphasized the benefits of centralized coordination in the conduct of vMMIs for swift resolut…	Satisfaction: Overall, there was consensus among candidates and interviewers that a virtual format using ZOOM was ’fantastic’ for conducting interviews. 91% felt comfortable with VIs, 91% found vMMIs an acceptable component of recruitment process. Format: Overall, the candidates found the virtual briefing prior to the vMMI useful, in particular knowing about the process and format of moving throu…	N/A	N/A	N/A	N/A	Several candidates commented vMMIs saved expense by eliminating travel and accommodation expenses, and they also saved time.	N/A	The vMMI is a feasible and acceptable alternative to IP MMIs. COVID has provided opportunities for innovation in the PGME selection process. Early selection of an IT platform and COVID safe environment for central coordination were key. This allowed for technology support, contingency plans and swift resolution of technical challenges. vMMIs are efficient and result in cost savings, and greater f…	Careful consideration of the various aspects of the structures and processes of conducting of vMMI is critical to its successful implementation. These include planning, the selection of a suitable internet platform, selecting an appropriate format for the interview, pre-MMI communication, providing the opportunity to test systems, the establishment of contingency plans, and the provision of suppo…	1) The experience may not be generalizable to areas with poor internet connectivity or places without on-site technical support; 2) The small sample size may have resulted in some lack of differentiation. 3) Unintentional bias may have been introduced in the focus group format, in which candidates may have hesitated to offer genuine feedback due to lack of anonymity. 4) The authors could only ass…	The vMMI is a feasible and acceptable method of selection into pediatric training. Careful consideration of the various aspects of the structures and processes of conducting vMMI is critical to its successful implementation. These include planning, the selection of a suitable internet platform, selecting an appropriate format for the interview, pre-MMI communication, providing the opportunity to …	Given the feasibility of vMMIs and the increased standardization this format provides, PGME programs in other countries should consider using vMMIs. Practical considerations for implementation include: Select a video conferencing platform that is familiar and fit for purpose; Provide comprehensive advice and tips covering technological aspects; Select a suitable venue; Conduct test calls to test …	1	1.5	1	1	1	2	1	1	Y	Y	Y	Y	Y	N	Y	Can't Tell	Y	Y
Sarac et al.	Virtual interviews for the integrated plastic surgery residency match: The program director perspective	2021	residency	integrated plastic surgery	USA	Survey of PDs of integrated plastic surgery residency programs in the United States to assess baseline program information, the number of positions and interview invites offered, and their perspectives on various aspects of the VI process in 2020-21.	To assess the perspectives of integrated plastic surgery PDs following the 2020–21 application cycle to better characterize the potential role of this interview modality in future application cycles.	N/A	Quantitative	Survey	Before and after match	62 PDs (RR 75.6%)	Satisfaction: The majority of PDs were satisfied with the VI process. Fit: PDs felt equally able to assess professionalism, interpersonal and communication skills and fit with IP vs VIs. Preference: Nonetheless, the majority of PDs preferred IPIs over VIs.	Satisfaction: 67.8% of PDs reported being satisfied with VIs (15.3% extremely satisfied, 52.5% somewhat satisfied), 15% were neither satisfied nor dissatisfied, and the remaining PDs were either somewhat dissatisfied (13.6%) or extremely dissatisfied (3.4%). Fit: PDs were asked how well they were able to judge professionalism (3.1 ± 1.1), interpersonal and communication skills (3.2 ± 1.1), and “f…	N/A	45.5% PDs reported an ideal time for a social of 1–2 hours, followed by 40.9% reporting 30–59 minutes, and 4.6% reporting over 2 hours. Overall, 36.4% of PDs found the social either “very useful” or “extremely useful,” 22.7% found it “somewhat useful,” and 13.6% found it “not so or not at all useful.”	37.1% PDs reported increasing the number of interviews per available residency position. This translated into an overall specialty-wide increase of 4.0 interview slots per available position.	N/A	N/A	N/A	N/A	This study reflects the majority opinion of PDs in integrated plastic surgery. While the majority were satisfied with VIs and they were able to assess fit, they largely preferred IPIs. Surveys from other sub-specialties show conflicting data. In 2020-21, programs received an average of 298 applications, which represents an 18% increase. 37% of programs increased the number of interview slots per …	N/A	1) Response and nonresponse bias. 2) Recall bias. 3) The survey referenced only integrated plastic surgery interviews and thus generalizability is limited.	Sixty-two (75.6%) of 82 integrated plastic surgery program directors completed a survey on their perspectives of the VI experience during the 2020–21 application cycle. 68% of PDs were satisfied with the VI process; however, 76.3% preferred IPIs.	Long-term data and perspectives examining how programs and residents who interviewed during the virtual 2020–21 application cycle compare with other IP cycles will help unveil whether VIs are a suitable replacement for IPIs.	1	1.5	1.5	1	0	2	1	1
Shah T et al.	Medical Students' Perspectives of Remote Residency Interviews	2022	residency	psychiatry	USA	Interviews were conducted using a semi-structured interview guide to explore psychiatry applicants' experiences with Vis from a single institution.	To understand students' experiences with Vis to highlight areas of improvement in future cycles.	N/A	Qualitative	Interviews	After Match, before arrival in program	8 applicants (RR 50%)	Strengths: Savings of time and money without travel. Weaknesses: Inability to physically view the hospital / city and meet current residents / get a sense of the culture.	N/A	Strengths: Saving time and money; Ability to schedule interviews back-to-back in geographically distant cities; Pre-interview activities where group sizes were small to facilitate conversations. Weaknesses: Inability to physically view the hospital or city; Inability to get a feel for the culture to see if folks get along / what stresses them out; Missing out on dinners / casual networking; Socia…	N/A	N/A	N/A	N/A	Participants valued the cost savings associated with remote interviews, with one stating, "I absolutely would have had to take out extra loans if traveling was required for interviews.”	N/A	Applicants put a lot of thought into their VI preparation and considered technology, backdrops, dress, lighting, and connectivity to limit disturbances.	Given identified concerns, program directors might consider adding virtual tours of facilities, so students can get a sense of the environment in which they will be working, as well as video blogs from current residents to reveal the workplace culture. To make the pre-interview events more conducive to intimate conversation, a smaller number of students might be placed in breakout rooms with 1–2 …	1) Small sample size at one institution, interviewing only students who successfully matched into psychiatry; 2) As a qualitative study, the intent was to discover students’ perspectives and detect themes, not to generalize findings. 3) This study took place near the end of the academic year while students were relocating, which may have impacted the response rate.	All participants mentioned positive and negative aspects of remote interviewing.	Practical changes to future Vis identified: virtual tours, blogs to get a sense of culture, small / intimate social events or Q & As, communication further in advance with links and schedules, breaks to mitigate Zoom fatigue.									Y	N	Can't Tell	Y	Y	N	Y	N	N	Y
Simmons et al.	Virtual recruitment: Experiences and perspectives of internal medicine program directors	2022	residency	internal medicine	USA	A national survey was conducted to understand internal medicine program directors experiences and program outcomes in the first completely virtual recruitment season. Program director's perspectives about application inflation and guiding principles for future recruitment seasons were also explored.	To understand the effects of the wholesale shift to virtual recruitment and how it might affect future recruitment.	N/A	Quantitative	Survey	After Match, before arrival in program	270 PDs (RR 61.9%)	Satisfaction: The majority of PDs were equally or more satisfied with their incoming intern class compared to 3 prior classes. Cost: Savings for programs are substantial for VIs (~$14K per filled position) and there was increased ease of faculty participation. Application inflation: PDs reported more applications, more interviews conducted, with fewer canceled or declined, and felt VIs contribute…	Overall, 81.2% of PDs (216 of 266) reported that they were similarly or more satisfied with their incoming intern class compared with the past 3 years; the responses of which did not vary by program type. Fit: VIs affected what PDs were able to convey about their programs and what they learned about applicants. Most felt VIs reduced their ability to showcase their facilities (89.9%), city (87.7%)…	N/A	40.9% of PDs reported increased ability to get faculty to conduct interviews. Slightly less than half of PDs (46.6%) reported investing more of their time for interview days. A minority of PDs endorsed a fully virtual (6%), or fully IP future (7%). 21% felt programs should make their own determinations and 29% preferred a hybrid option.	A majority of PDs reported receiving more applications (59.1%) and offering more interviews (61.5%). The median increase was 20% (mean: 22). 65% reported fewer applicants declined or canceled interviews. PDs reported that VIs contributed to application inflation, and 68% felt IM programs should offer preference signaling.	Applicant favorability, defined by asking the location on the rank list their last matched applicant, varied compared to the past 3 years (33% increased, 38% stayed the same, 29% decreased). Favorability varied by geographic region but did not vary by median program size, type, or PD’s tenure (median years in position). For PDs who reported less favorable matches, most (85.9%) attributed that out…	N/A	Almost all programs (94%) reported a somewhat or substantial decrease in recruitment costs.	N/A	The vast majority (>80%) of respondents indicated satisfaction with their incoming class of interns. Respondents reported more applicants to their programs (compared to the previous recruitment season), an increased number of interviews conducted, fewer canceled or declined interviews, and the perspective that VIs contributed to application inflation. Benefits of virtual recruitment were several,…	Application inflation control measures are needed.	1) Practices and PD opinions may change over time with more experience in future cycles. 2) PDs modified their recruitment practices in the midst of responding to a pandemic in which their trainees were on the front lines of care. This pressure may have significantly influenced their experience with VIs. 3) Response bias may impact the perspectives shared and the results may not be completely ref…	VIs offer significant cost savings for residency programs and applicants as well as reduced environmental impact, and most program directors reported satisfaction with the outcome. However, it may be more difficult with VIs to convey all program traits and to assess the extent of applicant interest. Application inflation remains a major challenge for both internal medicine programs and applicants…	Although a majority of program directors (74%) reported to favor or strongly favor a guiding set of principles on whether internal medicine recruitment should be conducted virtually, IP, or as a hybrid, there was not broad consensus about what those principles should be making the path forward unclear. Now that there is more planning time and given that a hybrid recruitment approach may be possib…	1	1.5	1	1	1	2	1	1
Singh et al.	Implementation of virtual multiple mini-interviews for fellowship recruitment	2021	fellowship	pain medicine	USA	Survey of applicants to a single institution to evaluate their satisfaction with the virtual recruitment experience including the use of the program's MMI.	To determine whether applicants to a pain medicine Fellowship were satisfied with the transition of the program's MMI to a virtual platform.	Applicants were provided technical instructions and 3 videos (program overview, interview day details, tour) in advance. Faculty interviewers were trained on implicit bias and Zoom. Contingency plans provided for lost internet connectivity. MMI: 6 non-medical scenarios consisting of a vignette and questions, shared via PPT / screen share, applicants given 8 minutes per scenario. Scenarios develop…	Quantitative	Survey	Before Match	24 applicants (RR 80%)	Satisfaction: The majority of applicants were very satisfied with the virtual MMI and recruitment experience. Confidence: The majority felt they obtained the necessary information for ranking.	N/A	Satisfaction: 63% very satisfied, and 37% satisfied. Ability of VI to be as good as IPI to decide on program match and cost-affordable solution: 58% very satisfied, and 10 42% satisfied. Fairness of VIs and ability to provide information needed to create rank list: 79% very satisfied and 28% satisfied. Confidence: Acquired necessary information to make informed decision for ranking the fellowship…	Online video “Program Overview”: 67% very satisfied and 33% satisfied. Online video “Interview Day Details," 75% very satisfied and 25% were satisfied. Online “Video Tour”: 58% very satisfied and 42% satisfied.	N/A	N/A	N/A	N/A	N/A	Conversion of the MMI to a virtual platform was feasible and positively rated by applicants. Process was beneficial from financial, staffing, and COVID safety standpoints. The majority were very satisfied or satisfied with the MMI process and interview day, indicating that the VI format was a good proxy for IPI while being cost-effective for the applicant. The key drawbacks were logistical and te…	Even though the VI process was rated well by applicants, there were anecdotal descriptions about the technology malfunctioning. The authors suggested more training on VI for faculty and fellows, and having IT support available would be helpful. A need to expand pre-recorded and web-based materials for applicants was also identified.	None described	MMIs are feasible and effective via VI format. Applicants are satisfied with the experience	Studying interview/PD experiences with the virtual MMI and across more institutions will be important for generalizability. MMIs are largely underutilized in residency and fellowship interviews though they are standard for medical school interviews. They may provide a more objective VI strategy to minimize bias in selection and warrant expanded study.	1	0.5	1.5	1	0	1	1	1
Snyder et al.	Applying to residency: survey of neurosurgical residency applicants on virtual recruitment during COVID-19	2021	residency	neurosurgery	USA	National survey of neurosurgical residency applicants from the 2020–21 application cycle. Survey was sent to all applicants who included academic video submissions to the Society of Neurologic Surgeons (SNS) repository as part of their application package (an option intended to compensate for presentations typically performed and assessed during away rotations).	To evaluate neurosurgical applicant attitudes and experiences associated with pandemic generated changes that occurred during the 2020–21 residency match cycle, in order to optimize the residency application process for all future participants.	N/A	Quantitative Qualitative	Survey	After Match, before arrival in program	124 applicants (RR 44.3%)	Fit: Subjective program and geographic “fit” were difficult to assess during VIs. Cost: Financial / time burden was reduced. VI format: The most helpful aspects of VIs were interviews w/ residents & faculty, pre-interview meetings w/ residents, and virtual tours. Preference / Future: Applicants preferred initial VI w/ subsequent IPIs or all VI w/ IP 2nd looks. Application control: Applicants favo…	N/A	Cost: Financial burden, time burden and ease of access were rated "low stress" by 95.2%, 88.7%, and 85.5 % of applicants respectively. Fit: Ability to assess the “fit/culture” of a program and ability to evaluate a program's location were rated "high stress" by 78.2% and 87.9% of applicants respectively. When asked to rate how well they were able to evaluate the differences in personality and cul…	84.6% of applicants attended some form of virtual program-specific sessions, and 82.1% found these sessions useful. Only 27.4% of applicants felt the academic video submissions augmented their application; 35% found the standardized LOR template helpful. 49.6% attended virtual second looks, and only 52.2% thought these were helpful. The most helpful aspects of VIs were interviews with residents (…	All applicants submitted applications to at least 31 programs. 39.7% received at least 21 invitations to interview, while 31.4% received < 10. 34.7% of applicants attended > 20 interviews, while 31.4% attended < 10 or fewer programs. 71.3% of applicants expressed interest in a standardized interview release date for all programs, 68.9% in a centralized scheduling portal, 64.8% in a cap on intervi…	78% of applicants reported matching into a neurosurgical residency, with the majority (68.5%) matching within their top 3 ranked positions. 28.1% ranked more than 21 programs. 32.2% ranked 10 or fewer programs.	N/A	Applicants reported spending $486 ± $1358, (range $0–$12,000) in VI related expenses. This cost was perceived as significantly lower than for IPIs.	N/A	Programs instituted virtual options, including conferences and/or “virtual sub-Is,” mentorship opportunities, and virtual program marketing sessions. To promote equity and augment the application process, they implemented standardized LORs and added an academic video presentation submission. Some virtual interactions were reported to increase ability of applicant and program to evaluate “fit” (e.…	VIs along make it difficult to assess fit and culture and a hybrid model may be preferred. First come first served interview invites are unpopular among applicants and more equitable options are needed.	1) Sampling and nonresponse bias. 2) The selection of applicants who submitted video presentations represents a form of selection bias.	Many survey respondents recommended use of a hybrid interview process or a limited in person component, along with reforms to protocols for interview invitation and scheduling. Applicants also reported that perceived program “fit "and “overall culture were the most important factors they consider when ranking programs but are difficult to assess in the virtual-only format. Applicants valued the r…	A disruptive event can allow for innovation and evolution. Rapid implementation of a virtual followed by a hybrid interview season may ultimately lead to more a equitable, effective, and efficient match process. Measurement of retention rates in mid-residency pre- and post-COVID will provide the most definitive outcome data regarding VI and match changes induced by the COVID pandemic.	1	1.5	0.5	1	1	1	1	1
Spencer et al.	Finding the next resident physicians in the COVID-19 global pandemic: An applicant survey on the 2020 virtual urology residency match	2021	residency	urology	USA	A survey with free text responses and semantic thematic analysis was used to assess applicant perceptions of VIs, querying multiple components of VIs during the 2020-21 match cycle for single urology residency program.	To assess interviewing applicant perceptions of virtual urology residency interviews in the setting of changes mandated by COVID-19 and to determine applicant preferences for virtual or IPIs.	Open houses were held prior to VIs for general program info. 5 Zoom VI days, 12 - 13 applicants per day. Interview days started w/ 30 min intro, Q&A with PD. Applicants were then divided into 2 groups. Faculty group: 8 mini-interviews, 15 min each w/ 1-2 faculty in breakout rooms. Resident group: 45 min virtual tour w/ residents, then 75 min informal interaction. After brief intermission, groups …	Quantitative Qualitative	Survey	Before Match	50 applicants (RR 76%)	Satisfaction: Overall satisfaction with VIs, faculty interactions and the virtual platform was very high. Most were satisfied with resident interactions, though these were rated slightly lower. Fit: Although the majority felt they were able to evaluate both site & program, these were the lowest rated. Cost: All agreed cost & time efficiency improved with VIs, and those who preferred VIs in the fu…	N/A	Satisfaction: 96% of applicants rated the Zoom platform and faculty interaction as good / very good. 76% listed resident interactions as good / very good. 64% of applicants rated their ability to get to know the program and training sites as good / very good. Nearly all (94%) described their overall experience as good / very good. Fit: 100% felt able to express themselves as “individuals” during …	Most identified factor favoring IPIs was improved resident interaction (56%), then better evaluation of site/program (41%), then better evaluation of culture of program (31%). Areas for VI improvement more included inter-applicant interaction and resident-applicant interaction.	N/A	N/A	N/A	100% noted cost benefits, 82% noted VI efficiency and 45% noted simplicity of the VI process.	N/A	Despite positive overall impressions of VIs, applicants preferred IP by a significant margin. Intangible effects like improved resident interactions, applicant interactions and ability to assess program culture in the "natural habitat" contributed to this preference. This is in line with prior work that shows overall satisfaction yet a persistent preference for IPIs. Convenience and lower costs w…	1:1 interactions w/ residents need to be improved - possibly with resident-only virtual happy hours and meal vouchers. Inter-applicant interactions need to be improved - possibly with inter-applicant breakout rooms. Introductions to the site and culture of program need to be improved - possibly with improved videos of sites and neighborhoods posted on the website.	1) Non-response bias. 2) Applicants may have worried about actual anonymity and reported erroneously positive perceptions. 3) Low sample size and single institution, single specialty. 4) May underestimate benefit of VIs vis a vis travel since this program (in NYC) has easy transportation to many cities across northeast.	Despite positive overall impressions of VIs, applicants preferred IPIs. Face to face interactions and difficulty assessing the culture of the program helped to explain this preference for IP. VIs are viewed favorably by applicants and will likely be a significant component of the 2021-22 urology interview cycle.	As applicants are largely satisfied with VIs, programs should focus on improving the intangible benefits of interviews (assessing program culture and sites). Larger studies of applicant preferences in multi-center and multi-specialty surveys are needed.	1	0.5	1.5	1	1	1	1	1
Strumpf et al.	Virtual interviews: challenges and opportunities for pulmonary disease and critical care medicine fellowship programs	2021	fellowship	pulmonary critical care medicine	USA	Cross-sectional survey of applicants and interviewers involved in VIs for a single institution's pulmonary critical care medicine fellowship to understand advantages and disadvantages of Vis, overall experience and future recommendations.	Gather information from applicants and interviewers about VI to inform future VI processes and recruitment efforts	N/A	Quantitative	Survey	Before Match	87 applicants (RR 16%), 22 interviewers	Fit: The majority of applicants and interviewers agreed / strongly agreed they were able to represent themselves / the program adequately. Future: Majority of interviewers and applicants would prefer a hybrid model. Strengths / Weaknesses: For applicants - savings in cost, clinical coverage, & not missing clinical training were the greatest advantages, not meeting faculty / fellows IP, or being a…	Fit: 82% agreed / strongly agreed they were able to present themselves adequately, and 68% agreed / strongly agreed that VIs allowed them to present their programs adequately. Future: The majority (64%) favored a hybrid interviewing model in the future, whereas a preference for strictly VIs or IPIs was evenly split at 18% of faculty favoring each. Strengths / Weaknesses: Location flexibility was …	Fit: 59% agreed / strongly agreed VIs provided the chance to adequately represent themselves. 77% agreed / strongly agreed that their questions were answered during VIs. 63% believed that VIs would slightly or strongly hurt their chances of getting into their top programs. Future: 59%, if given the chance in the future, would favor a hybrid model, whereas 24% would favor all IP, and 17% all virtu…	57% had not received any formal training on VIs and only 16% having received “extensive training” defined as more than 30 minutes. The program's website and virtual tour were rated more important by applicants than social media presence.	N/A	N/A	N/A	N/A	N/A	The majority of applicants and interviewers felt that the VI process allowed them to adequately represent themselves despite the limitations of VIs. Saving on the cost of travel and not having to arrange for clinical coverage were the most important factors for applicants. Flexibility of interviewing from anywhere was most important for interviewers. Applicant's were most interested in a program'…	VI can work but there are some things that are lost without IPIs (visiting the city, meeting with fellows in-person). If VIs continue, more training on VI best practices needed.	1) Sampling limited to applicants to 2 fellowship programs in the Midwest; 2) Low response rate; 3) Did not address gender or URiM differences.	VIs offer many advantages to both applicants and programs and are likely to continue to be part of the recruitment season even once IPIs are determined to be safe to conduct again. Training and guidelines for best practices regarding VIs should be developed, and Pulmonary Critical Care Medicine society engagement and leadership on this issue is urgently needed.	Guidelines on best practices / future models from societies are urgently needed to avoid a patchwork quilt of practices across programs.	1	0.5	0.5	1	1	2	1	1
Taparra et al.	The impact of COVID-19 on radiation oncology residency applicant away rotations, interviews, and rank lists: A comparison between the 2020 match and 2021 match	2022	residency	radiation oncology	USA	Survey of radiation oncology applicants to assess the COVID-19 pandemic influence on the match process.	To evaluate COVID-19 related changes to the radiation oncology match, including away rotations, interviews, and program ranking in 2020 and 2021.	N/A	Quantitative	Cost analysis, survey	After Match, before arrival in program	76 applicants in 2021 (RR 57%), 76 applicants in 2020 (RR 54%)	No difference in applicant demographics. Significantly fewer away rotations attended in 2021. Satisfaction: Applicants were generally satisfied with VIs. Fit: Applicants felt unable to adequately assess program culture. Cost: The significant cost reductions were thought to be worth the trade-offs. Increased importance of facility tech and program websites noted.	N/A	Satisfaction: 84% were satisfied with VIs, yet 54% preferred IPIs. Cost: 72% felt the cost savings were worth VIs. Fit: Only 51% gained sense of the program culture from VIs.	45 % did not complete away rotations in 2021, compared to 11% in 2020. 65 % of away rotations were virtual and no credit in 2021. Applicants applied to a median of 20 programs, were offered 16 interviews and accepted 14 interviews in 2021. 60% of applicants put emphasis on facilities tech and machines in 2021 vs 35% in 2020, and 35% put emphasis on program website in 2021 vs 15% in 2020. Post int…	N/A	N/A	N/A	In 2020, 49% spent between $1,000-5,000, and 49% spent > $5,000. In 2021, 45% spent <$100. An additional 34% spent $100-1,000. No one spent > $5,000.	N/A	Away rotation costs are significant. URiM students are less likely to attend medical schools with radiation oncology departments and thus depend on away rotations for exposure and mentorship. There is the potential to increase equity / diversity for URiMs by increasing virtual rotations. There is also potential to increase access for those restricted from travel due to familial obligations. IPIs …	N/A	1) Respondents represented applicants to 1 large radiation oncology program, potentially limiting the generalizability of the study; 2) Data interpretation is limited by a 56% response rate. Response bias is also possible; 3) The timing of survey distribution may impact recall bias, although the survey followed Match Day to allow respondents to answer questions honestly without worry of impacting…	2021 applicants completed fewer away rotations (mostly virtual, many without credit), were satisfied with VIs and associated costs savings, reported decreased familiarity with program culture, and engaged in more post interview communications. This study provides support for exploring virtual away rotations and interviews beyond the pandemic.	Overall, applicants are satisfied with Vis. Virtual rotations and interviews should be explored for the future as the cost savings appear worth the tradeoffs of being able to assess culture.	2	0.5	1	1	0	2	1	1
Tawfik et al.	Perspectives on the orthopaedic surgery residency application process during the COVID-19 pandemic	2021	residency	orthopedic surgery	USA	A cross-sectional survey study of applicants and PDs involved in the 2020-21 orthopedic surgery match. Used 2 independent but similar surveys addressing the application process and perceived effect of virtual experiences.	To evaluate the current perspectives of applicants and PDs regarding the orthopedic surgery residency application process during the COVID-19 pandemic	79% of programs reported offering some form of virtual opportunity, including virtual away rotations (24%), virtual happy hours (64%), virtual conferences (64%), and other (16%). The other category included virtual town halls, Q & A sessions, and videos about the program.	Quantitative	Survey	Before Match	113 applicants (RR 20%), 29 PDs (RR 19.6%).	Fit: PDs and applicants struggled to assess fit as well virtually. Preference: Most applicants and PDs prefer IPIs. Strengths / Weaknesses: Faculty and resident interviews replicated well virtually, but facility tours, informational talks, and "fit" did not.	Preference: 82% of PDs preferred traditional IPIs. Fit: PDs reported faculty & resident interviews could be replicated well virtually (3.24 + 0.99 & 3.34 + 0.94). However, facility tours (3.00 + 1.25), informational talks (2.79 + 1.35) and understanding applicant "fit" (2.9 + 1.14) was not as easy virtually. Ranking: PDs reported a strong impact on rank list of faculty (4.38 + 0.86) and resident …	46% of applicants were concerned about VIs, though larger numbers were concerned about away rotations (78%) and networking (53%). Preference: 76% of applicants would prefer traditional IPIs. Ranking: Applicants reported faculty (3.73 + 1.00) and resident interviews (3.68 + 1.12) most affected how they made their rank list. Applicants reported Informational talks, virtual socials, and facility tou…	79% of PDs offered virtual experiences (rotations, happy hours, conferences, Q&As, videos). Applicants participated in 2.4 virtual rotations. Factors that applicants and PDs found most important for receiving/ offering an interview were compared: Applicants overvalued LORs, networking, personal connection to a faculty member, being a student at the residency’s institution, and their medical schoo…	Applicants applied to 97.6 + 34.7 programs and received 13.3 + 9.1 interviews. 56.3% applied to more programs. Programs received an average of 530.6 + 233.5 applications (compared to 493 previously). Programs conducted the same number of interviews.	N/A	N/A	N/A	N/A	VIs "missed the mark" with applicants and PDs overwhelmingly preferring IP experiences. Applicants felt less confident in matching, which was not without merit, as applicants applied to more programs but received fewer interviews than in previous cycles. Historically away rotations have been critical for applicants and PDs to evaluate each other. Applicants may have underestimated the importance …	Virtual experiences did not adequately replicate the social factors that applicants and programs found most important when making rank lists. While applicants felt obliged to participate, none of the additional virtual opportunities (virtual away rotations, virtual social events/tours) played a major role in influencing applicants' rank lists. More work needs to be done to improve virtual experie…	1) Low response rate. 2) Selection bias (only applicants to a single institution were surveyed). 3) PDs are only part of a larger selection committee, their replies may not fully reflect how applicants are evaluated. 4) Survey was of perspectives only, may not reflect how the two groups actually acted.	Virtual experiences in response to the COVID19 pandemic did not adequately replicate away rotations and IPIs. Decisions by PDs and applicants were most affected by the faculty & resident interviews. The non-interview virtual experiences need to be improved in future years if IPIs are not available.	Focus on improving the virtual experience. Limit virtual experiences and rotations to 3-4 applicants to allow for more meaningful interactions. Pair rotating students with a resident mentor. Re-instating IP away rotations for surgical subspecialties may be more important than reinstating IPIs.	1	1.5	0.5	1	0	2	1	1
Taylor, Freeman et al.	Applicant perception of virtual interviews in cardiothoracic surgery: A thoracic education cooperative group study	2021	fellowship	cardiothoracic surgery	USA	Cross-sectional survey of cardiothoracic surgery program applicants in the all virtual 2020-21 match cycle (comparisons made with similar study conducted during previous interview cycle by same authors.)	To identify the aspects of the VI process that were viewed most and least favorably.	N/A	Quantitative	Survey	After Match, before arrival in program	60 applicants (RR 43%)	Satisfaction: Most applicants felt VIs were convenient and a favorable experience. Fit: Applicants struggled to assess several components of fit (culture / personality of the program, city, lifestyle, benefits, cost of living) though this improved from the 2020 to 2021 cycle. Format: Most valued were informal and formal interactions with current fellows. Match: Few programs matched home applicant…	N/A	Satisfaction: Applicants found VIs convenient (97%), and most had a favorable experience (87%). Matched applicants had more favorable experiences than unmatched applicants (92% vs 50%, p=0.02). Fit: 50% felt able to evaluate programs fully. Characteristics of the program that were best conveyed virtually: case numbers (76%), call schedule / support (57%), didactic curriculum (55%). Characteristic…	Format: The most valued aspects of VIs in descending order were the informal meet with current fellows (4.2 of 5), the formal interview with current fellows (4.1 of 5), the conference call with attendings (3.2 of 5), the prerecorded video (3.1 of 5), and the program’s social media site (2.0 of 5).	The average number of interviews attended by each respondent was 16. 78% of respondents interviewed at more than 10 programs.	Most important factors used by candidates to rank programs were case numbers, culture/personality, and city/lifestyle. Least important factors used to rank programs were didactic schedule, benefits / cost of living.	80% of respondents successfully matched. 17% of those who matched did so at a program where they had prior clinical experience. 50% matched into their top 3 choices. First-time and reappliers had identical match rate (80%). Applicants who interviewed at >10 programs were more likely to match than those who interviewed at <10 (91% vs 38%, p = < 0.01).	N/A	N/A	Candidates' favorable experiences and ability to better evaluate the program in 2020-21, is likely the result of improved preparation and increased familiarity with the virtual format (compared to Taylor, Wallen et al. in 2019-20). This trend supports continued use of VIs. Compared to last year's data where most wanted IPIs, most preferred a hybrid future model. There is a persistent gap in the i…	Culture/lifestyle of a program was influential in how candidates ranked programs, but this was not well portrayed in Vis. Formal and informal meetings with current fellows were particularly beneficial and should be components of the VI.	1) Low response rate; 2) Respondents who matched may have regarded VIs more favorably; 3) No information regarding platforms used (Zoom/Teams etc.) or ease of use/functionality	Growing familiarity with VIs have made applicants regard them more favorably. Programs still do not convey their culture / city effectively through VIs. VIs may be enhanced by creating more comprehensive websites and social media pages. A virtual component to fellowship interviews may become permanent.	There should be a permanent VI component as it reduces travel time/cost. Future VIs could be followed by IP tours / meetings after rank list submission by PDs at a small number of programs to ensure applicants get a feel for the intangibles that are lost in VIs. Use of social media/vignettes about trainees outside of the workplace could provide applicants with greater familiarity regarding a prog…	1	1.5	0.5	1	0	2	1	1
Taylor, Wallen et al.	Interviews during the pandemic: A thoracic education cooperative group and surgery residents project	2022	fellowship	cardiothoracic surgery	USA	Cross-sectional survey of cardiothoracic surgery program applicants in the part IP, part VI 2019-20 match cycle as the COVID 19 pandemic started to explore efficacy, strengths and inadequacies of Vis.	To measure the experiences, preferences, and perceived deficiencies of the VI process compared with the IP format.	N/A	Quantitative	Survey	After Match, before arrival in program	48 applicants (RR 36%)	Fit: Applicants were unable to get a good sense of many important aspects of the program, notable the program culture / personality, and city / lifestyle. These are important components in ranking considerations. Future: Most would prefer an IPI component.	N/A	Fit: Only 29% felt they could adequately evaluate a program during their VI. Characteristics of the program that were best conveyed virtually: didactic schedule (81%), case number/autonomy (58%), call schedule / workload (56%). Characteristics least well conveyed virtually: reputation of program (50%), benefits / cost of living (50%), culture/personality (19%) and city / lifestyle (15%). Future: …	N/A	73% of applicants interviewed at 11 or more programs. Half the respondents scheduled more interviews once programs converted to VIs.	Most important factors used by candidates to rank programs were case numbers (4.87 of 5), culture/ personality (4.56), and reputation of the program (4.27). Least important factors used to rank programs were benefits/cost of living (2.58) and city/lifestyle (2.96)	50% of respondents who matched did so at a program where they had IPI and 50% VIs. 50% of respondents placed a program that they had interviewed at IP as their first choice. Respondents who interviewed at >10 programs were more likely to have matched successfully (94% vs 69%, p=0.02).	N/A	N/A	The most striking result from the survey was that 96% of applicants favored an IP component to the interview process. Despite the cost and difficulty in taking time off rotations to travel, most applicants favored the traditional system versus VIs. This elevated percentage suggests that there is room for cardiothoracic programs to improve their VIs. A comprehensive VI process will be more likely …	The most deficient aspects of VIs were in portraying the culture/personality and the lifestyle in the city. These deficiencies underscore an important point. To showcase their training program adequately, PDs need to utilize their online website and social media on a year-round basis.	1) Low response rate; 2) Responses may be different if more candidates who did not match responded; 3) No information solicited regarding interview format, platforms used or ease of use / functionality	Deficiencies in the VI process exist. In particular, programs did not portray the culture and personality of the program and were not effective in describing the lifestyle within the city. As the VI process will be mandatory for 2020-21 and likely more prevalent in the next 10 years, programs must enhance the virtual experience. Increasing the social media and online presence, adding virtual tour…	Programs should consider virtual tours, staff narrations, vignettes from current fellows regarding lifestyle/well-being and optimize their online presence to reflect program culture and the city / lifestyle. Future studies (at least a year after arrival in the program) are needed to determine if trainees who matched virtually are less satisfied with their program than trainees who matched at a pr…	1	1.5	0.5	1	0	1	1	1
Temsah et al.	Remote interviews for medical residency selection during the initial COVID-19 crisis: a national survey	2021	residency	multiple pediatrics, family medicine, internal medicine, surgery, emergency medicine, psychiatry, pharmacy, urology, radiology, pathology, dentistry, OB/GYN, neurology, neurosurgery, critical care, dermatology, ophthalmology	Saudi Arabia	A cross-sectional, nationwide survey was sent to all applicants in the Saudi Commission for Healthcare Specialties March 2020 cycle to assess applicants’ satisfaction with the newly introduced VI process for medical residency training programs during the COVID-19 pandemic.	To assess applicants’ satisfaction with Vis for medical residency training programs in the Saudi March 2020 Match cycle during the COVID-19 pandemic.	Zoom or FaceTime	Quantitative	Survey	Before Match	510 applicants (RR 12%)	Satisfaction: The majority of applicants preferred VIs over IPIs, with the majority rating their experience as very good or excellent. Confidence: About half felt confident in ranking decisions, whereas 30% were neutral. Strengths / Weaknesses: Cost savings for applicants and programs in terms of time and money are significant. Negatives were slow / inconsistent internet, absence of clear instruc…	N/A	Preference: 63% of applicants preferred VIs, 18% preferred IP, and 19% were neutral. Satisfaction: 61% rated VIs as very good or excellent, 28% good, and 11% fair or very poor. Format: 61% felt VIs were just or very organized, 31 % somewhat organized, and 6 % not organized or very disorganized. 74.1% felt the VIs were the right length, and picture quality, voice quality, time flexibility, and pla…	Factors that positively affected VIs were free-use of interview platforms, clarification emails and precise instructions. Factors that negatively affected VIs were slow, inconsistent, and interrupted Internet speed and connection, absence of clear instructions, and lack of previous experience with these applications used for teleconferencing.	N/A	N/A	N/A	Comparing IPIs with VIs, 36% of applicants saved >500 SR ($133), 17% saved 100-500 SR, and 47% saved <100 SR. Cost-savings was one of the independent variables associated with high applicants’ satisfaction with VIs.	N/A	IPIs have been in use for decades and there are significant costs in terms of time and money to programs (hosting, time away from clinical duties) and applicants (flights, accommodation, transportation, time away from studies). Scheduling conflicts often emerge between centers can create challenges, especially when spread over multiple cities in big countries. Applicants preferred VIs over IPIs, …	Slow or interrupted internet connection; absence of clear instructions, and lack of previous experience in teleconferencing were the top negative factors with Vis that can be proactively mitigated.	1) Subject to recall bias. 2) Geographical distribution of applicants not assessed.	VIs were successfully implemented during the COVID-19 pandemic in the medical residency application process in Saudi Arabia. The residency applicants preferred VIs, and the cost savings and easier logistics.	Vis should persist in some format in the future as they are well-received and have benefits of cost / time savings. Implementation would benefit from establishing protocols for troubleshooting technology issues and piloting software in advance for applicants and interviewers. Generalizability to lower resource settings is in question and studies are needed in less developed nations.	1	1.5	0.5	1	2	2	1	1
Vallejo et al.	Virtual interviewing in the COVID-19 era: A survey of graduate program directors	2022	residency and fellowship	multiple (including dentistry)	USA	Survey of PGME & graduate dental PDs at a single institution using closed and open ended questions to determine the benefits & pitfalls of the VI process.	To seek graduate medical and dental PDs’ feedback about VIs at our tertiary care institution by examining how individual programs instituted VIs, assessing overall experiences with VIs, and ascertaining a plan to retain or eliminate VI options in the future.	Programs used a variety of virtual platforms: Zoom 79%, Thalamus 15%. Social interactions with residents: day of interview 75%, day before interview 17%, after formal interview 6%. Time allotted for interview of each applicant was <30 min for 77% of respondents, 30-45 minutes for 21% respondents, 45-60 min for 2%. Mean applicants interviewed 10+/-7 in single day.	Quantitative Qualitative	Survey	Before and after match	52 PDs (RR 70%)	Satisfaction: All PDs were satisfied with Vis and found them user friendly. Fit: Some felt Vis allowed them to promote their program / university but others did not. Cost: Costs were lower for programs. EDI: VIs can introduce bias and selective disadvantages was a concern. Preference / Future: The majority of PDs would offer VI or IP, though a sizable minority would resume all IPIs.	69.2% of PDs had never performed VIs prior to the COVID-19 pandemic, yet 94.2% agreed that VIs were user-friendly. Satisfaction: All PDs rated VIs as satisfying (11.5% slightly, 51.9% moderately, 36.5% very satisfied). 92% reported being prepared to implement VIs. Fit: 65.4% indicated VIs allowed them to promote the university and their program. EDI: 59.6 % agreed with statement that VIs can intr…	N/A	65.4% reported video conferencing fatigue.	N/A	N/A	N/A	83% of PD respondents considered VIs to be financially beneficial to program.	N/A	Although strong majority of respondents had no VI experience, nearly all felt prepared for VIs and found VIs to be convenient, efficient and financially beneficial. PDs felt the VI process may introduce bias in resident selection (e.g., poor internet service or visual background issue) and reported VIs disadvantaged some applicants. VIs may hinder PDs' ability to promote university & program. Fin…	VI process overall worked well. Introduction of bias and selective disadvantages was a concern. Questions still remain about each applicants ability to assess climate and culture in Vis.	1) Single institution study, may not be generalizable. 2) Did not study what training interviewers received. 3) Did not learn about specific variations in each programs VI structure.	Strong majority of PDs were satisfied with VI process, and found it user-friendly and financially beneficial. PDs generally interviewed more applicants and videoconferencing fatigue was common. VIs may disadvantage some applicants and may introduce bias in rankings, and may potentially compete with efforts to achieve diversity & inclusiveness in training programs.	VIs likely to continue in some form post-pandemic. Further study of interviewee experiences and how to mitigate disadvantages is needed. Best practices may include permanent option for VIs for applicants with special circumstances (e.g., financial hardship, military deployment, and other travel constraints.) Interviewers should receive implicit bias training. Each applicant could use an identical…	1	0.5	1	1	1	1	1	1
Van der Laan et al.	Virtual interviewing for pediatric emergency medicine fellowship-A national survey	2022	fellowship	pediatric emergency medicine	USA	Cross-sectional national survey of PDs and applicants to pediatric emergency medicine fellowships on ease of VIs using closed and open ended questions. PD surveys collected data on opinions on VI, obstacles encountered, and overall cost of the recruitment season. Applicant survey obtained information on ease of VI, adequacy of VI to make a well-informed program selection, influencers on program r…	To evaluate both applicant and interviewer satisfaction with the 2020–2021 “virtual only” process to evaluate and improve VIs as a tool for fellowship recruitment in the future.	All PDs reported their VI days mirrored their prior IPI days with the same number of interviews and interviewers per session.	Quantitative Qualitative	Survey	Before Match	145 applicants (RR 50%), 39 PDs (RR 48%)	Satisfaction: The majority found VIs to be an effective form of recruiting. Fit: Most PDs were able to get feel of applicant personality, make a connection with them, and answer their questions. Applicants were able to have their questions answered thoroughly and connect with their interviewers. Confidence: Applicants and PDs felt they had enough data to have confidence in ranking. Cost: VIs are …	Satisfaction: The majority of PDs agreed / strongly agreed VIs are an effective form of recruiting (82%), (Cost) VIs saved the program money (97%), VIs were easy to schedule for faculty (88%), and (Confidence) VIs provided adequate information to rank (58%). Fit: PDs for most / all applicants were able to answer questions (100%), make connections with applicants (97%), found it easy to make eye c…	Satisfaction: The majority of applicants agreed / strongly agreed VIs saved them money (100%), were easy to schedule (96%), their questions were answered thoroughly (93%), they felt comfortable with the virtual platform (90%), (Fit) they were able to connect with the interviewer (78%), they were able to make eye contact (67%) and (Confidence) VIs provided adequate information to determine rank li…	Social media was used by 56% of PDs with majority (96%) using Instagram. 75% of applicants endorsed visiting a program's social media pages, with the majority viewing Instagram. 71% reported that program information on social media was helpful.	PDs received more applications (117 vs 95), offered more interviews (35 vs 28), had fewer offers declined (3 vs 2) and ranked more applicants (32 vs 24). Applicants applied to an average of 26 programs, were invited to & attended 10 VIs, and ranked 9 programs. Reasons to decline in descending order included: already had too many VIs, not interested, unable to take time off, or conflict with anoth…	N/A	N/A	Average cost associated with application season $725, median amount of $500, and standard deviation of $817. International applicants spent the most followed by the northeast applicants. Repeat applicants spent average $1300 compared with $4312 during the previous season (p = 0.089). There was no association between amount of money spent and number of interviews.	N/A	VIs are associated with cost savings (for programs and applicants) but both PDs and applicants prefer to have some IP aspect of recruitment. This is likely related to the fact that applicant's top reasons influencing ranking included location and personality of the program, something that is difficult to replicate in the VI. VIs paralleled the traditional interview day format in PEM fellowship pr…	N/A	None described	VIs are a feasible method of recruitment for pediatric emergency medicine fellowships and provide cost savings to both applicants and programs. Despite this, applicants and programs demonstrated a preference for a hybrid model. VIs could possibly be used as a tool for filtering applicants to a IPI.	Leveraging alternative forms of information such as social media / websites may help applicants better understand program intangibles, such as geography, location, and culture. VIs might serve as a screening tool for moving applicants on to the next stage of IP interviews, though this reintroduces more costs back into the system (and may induce greater scheduling challenges) than VIs followed by …	1	1.5	0.5	1	0	2	1	1
Vasanthan et al.	Virtual adaptation of multimodal cardiac surgery residency interview: For the pandemic and the future	2021	residency	cardiac surgery	Canada	Adapted a previously IP multimodal interview to evaluate situational awareness, performance under pressure, and suitability to a virtual platform for a specific cardiac surgery program.	To adapt an IP multimodal interview to a virtual format and assess via surveys of interviewers and applicants.	Day comprised of written situational judgement test (SJT), an MMI and a panel interview. SJT requires applicants to read a scenario in Google forms and rank appropriate responses from most to least appropriate. MMI on Zoom using 8 breakout rooms for applicants. The panel interview involved multiple interviewers and one interviewee accessing the meeting from their personal computers. WhatsApp was …	Quantitative	Survey	Unclear, but before arrival in program	7 applicants (RR 88%); unknown number of interviewers	Satisfaction: Uniformly positive experience with VIs, but not at good as IP. Fit: Interviewers felt VIs didn't always allow for similar assessment of applicants, however all applicants felt they were able to get a good assessment of the program. Format: SJT and MMI transitioned well online, though some felt interview day was too long.	Likert scale (1=strongly disagree 5=strongly agree, median reported). Satisfaction: interviewers overall VI experience positive (5); Fit: VI provided a similar assessment of applicant as IP (3); MMI well adapted to virtual format (5); Panel interview well adapted to virtual format (4); Responses about VI generally favorable but reported not as good for assessing applicants as IP. MMI and panel in…	Likert scale (1=strongly disagree 5=strongly agree, median reported): Satisfaction: Applicants overall VI experience positive (5); Fit: VI similar assessment of applicant as IP (4); VI had no impact on interview experience (4); VI had no impact on interview performance (4); Able to obtain good assessment of program (5); Format: Applicants reported virtual situational judgment test was easy to nav…	N/A	N/A	N/A	N/A	N/A	N/A	Applicants' responses about VI were generally favorable but some applicants reported interview day too long. Responses about VI generally favorable by Interviewers but reported not as good for assessing applicants as IP. Both interviewers and applicants reported MMI and panel interviews well adapted for Vis.	Should streamline interview day to focus on activities that most differentiate applicant. VI day was too long for some applicants especially since all of the time was at a computer.	N/A	Successfully adapted multimodal interviews to virtual format. Strategy was well-received by applicants and interviewers. Viable option to continue even after pandemic restrictions lifted.	To decrease length of VI day, can adjust format to prioritize evaluation modalities that best differentiate candidates. Eliminates financial barriers while maintaining key aspects of assessment. Savings could be used for away electives which allow for assessment in both directions over longer time.	1	0.5	0.5	1	0	1	1	1
Venincasa et al.	Ophthalmology residency match in the Covid-19 era: Applicant and program director perceptions of the 2020-202 application cycle	2022	residency	ophthalmology	USA	Survey of national ophthalmology PDs and a single program's applicants using closed and open ended questions to evaluate experiences & preferences related to COVID19-related application & interview process in 2020-21.	To evaluate the experiences of ophthalmology residency applicants and PDs during the 2020–21 application cycle, with particular emphasis on changes brought about by the COVID- 19 pandemic.	N/A	Quantitative Qualitative	Survey, Cost analysis	Before and after Match	205 applicants (RR 34.9%); 37 PDs (RR 30.3%)	Satisfaction: Overall positive consensus from applicants and PDs. Preference: Most applicants and PDs expressed a preference for IPIs, however, for future cycles, applicants and PDs were unsure or only marginally preferred a return to IP. Cost: Applicants spent thousands of dollars less and had to take out fewer loans. Format: Zoom preferred. Application control measures: PDs reported application…	Future: 79% of PDs preferred IPIs, but only 39% of PDs preferred going back to IP in the future and 29% were unsure. 82% of PDs preferred Zoom for interviews.	Satisfaction: Applicant sentiment regarding VIs was mostly positive (41% liked VIs and 24% were neutral). 71% preferred IPIs, but given choice for future cycles, most applicants were unsure (38.4%) or preferred to keep VIs (35%). 88% of applicants preferred Zoom for interviews.	Applicants were overwhelmingly positive about SFMatch centralized interview scheduling, with 69% rating it a “5-out-of-5” and 23.2% rating it a “4-out-of-5.” PDs felt similarly, with 79% “liking” the centralized process. When applicants were asked how often they received their desired interview dates, on a scale of 1 (Never) to 5 (Always), the most common answers were 4 (48%) and 5 (28%). 87% of …	Applicants applied to 80 ± 23 programs, received 13 ± 9 invites, and attended 11 ± 6 interviews. 32% of felt they applied to the “perfect number” and 30% applied to "too many" programs. These results differ from PD opinions. 72% reported they received more applications than they preferred. 61% of applicants felt there should NOT be a limit on applications, though 61% felt interviews should be cap…	144 (84%) applicants reported matching at a mean position of 3 (SD 2.5) on their rank list.	N/A	Applicants spent an average $2321 (SD $1173) on application process in 2020-21, significantly less than 2018-19 cycle: $5689 (SD $2843) (P < .001). Only 22.7% of applicants had to seek additional finances in 2020-21 compared to 67.6% in 2018–19 (P < .001).	N/A	Match rate of 84% lower than 93% match rate in 2018-19. An increasing number of application were sent, fewer invites were received, and a higher number of interviews were attended than in 2018-19. Since VIs were easier to attend, fewer interviews were declined, and programs likely took fewer applicants off their wait list. PDs, but not applicants, support application caps. Both support interview …	VIs overall were successful and had favorable feedback from applicants and PDs.	1) Only surveyed applicants to a single program, (missed 13% of US applicants). 2) Some SF Match data unavailable and limited statistical analysis. 3) Low response rate / possible response bias. 4) Potential recall bias since applicants self-reported costs of interviewing.	COVD19 pandemic caused additional difficulties, beyond the usual complexities of the ophthalmology match. The VI system allowed for a successful process and despite the difficulties, applicants and PDs have a generally favorable outlook. Further VI optimization will be needed in future years.	Application caps are needed by PDs, but most applicants do not want them due to uncertainties regarding selection criteria. For an application cap to be successful, increased transparency is needed to help applicants make informed decisions about where to apply. Economically disadvantaged students may have lower quality equipment and rental equipment should be made available to alleviate disparit…	1	1.5	0.5	1	0	2	1	1
Vining et al.	Virtual surgical fellowship recruitment during COVID-19 and its implications for resident/fellow recruitment in the future	2020	fellowship	complex general surgical oncology	USA	Cross-sectional survey of applicants and faculty at a single institution on the experience with VIs for a complex general surgical oncology fellowship.	To describe a successful VI methodology, to determine if VIs were technically acceptable, if faculty and applicants could adequately convey themselves, and preferences for VI vs IP interviews in future.	Website containing videos with program highlights and faculty / fellow bios was provided to applicants in advance. On the interview day, applicants met via Zoom with PD (10 min) and leadership (15 min) and completed 3, 1:1, 30 min interviews with faculty with breaks. Each faculty was assigned their own Zoom room and applicants given a schedule with links. Current fellows held an informal Q & A in…	Quantitative Qualitative	Survey	Before Match	16 applicants (RR 80%), 12 faculty interviewers (RR 92%)	Satisfaction: Majority of applicants and all faculty felt VIs were seamless. Fit: Applicants and faculty felt they were able to portray themselves well. Strengths: cost, time efficient, flexible, less stress, convenient. Weaknesses: worry about tech issues, can't get feel for hospital, loss of interactions between applicants, current fellows, & staff. Preference: Most of applicants & faculty pref…	Satisfaction: All (100%) of faculty felt VI were seamless / very seamless. Fit: All (100%) felt that applicants were able to portray themselves within VI. 50% of faculty preferred IPIs, 33% favored VIs. Strengths: flexible, efficient, convenient (faculty able to conduct interviews from the hospital). Weaknesses: applicants didn't get a good sense of the hospital, nervousness over technical issues.	Satisfaction: The majority (75%) of applicants felt the VI day was seamless or very seamless, 25% were neutral. 75.0% had no technical issues. Nearly all (94%) felt comfortable asking questions or making comments during VIs. Fit: Most (81%) felt they were able to convey themselves very well or well. All (100%) reported adequate faculty and fellow accessibility. All (100%) reported either a very g…	100% received adequate information about the VI process and used the fellowship website to familiarize themselves with the program. 19% prepared with a mock VI and 67% found doing so helpful.	N/A	N/A	N/A	N/A	N/A	VI technically feasible and majority of faculty and applicants felt process was seamless. Faculty and applicants felt that they portrayed themselves well. There are many strengths of VIs including thousands of dollars in cost savings for applicants and programs, reduced stress, reduction in missed work days, flexibility for faculty, and other efficiencies. Nonetheless, both groups preferred IP if…	Key recommendations: 1) Hold mock interviews to identify tech issues. 2) Design multiple methods for applicants to learn about the program. Add content to existing websites, narrated videos or podcasts, and organize an informal ‘happy hour’ with fellows and provide open forums with fellows during the interview day. 3) Foster contact with faculty in individual and group settings. 4) Consider a str…	None described	VI work and are effective, reduce stress and cost. All that being said, IP is still preferred due to a desire to see the city and meet IP with faculty, fellows and leadership.	Need more study to understand if anything can be adjusted so that VIs could ultimately be preferred over IP, in order to optimize all the benefits of cost savings, reduced time away, etc.	1	0.5	1.5	1	0	1	1	1
Whisonant et al.	Evaluating the integrated plastic surgery residency match during the novel coronavirus pandemic	2021	residency	plastic surgery	USA	Match analysis, comparing integrated plastic surgery residents from 2021 to those from 2016-20.	To determine if there was an internal applicant preference or regional preference comparing the 2021 results to previous Match cycles from 2016 to 2020.	N/A	Quantitative	Match analysis	After Match, before arrival in program	153 applicants in 2016, 163 in 2017, 172 in 2018, 174 in 2019, 180 in 2020, 187 in 2021	Match outcomes: Increased rate of home match in 2021, and increased rate of women matching in integrated plastic surgery.	N/A	N/A	The percent of women increased from 44.2% from 2016-20 to 66% in 2021.	N/A	N/A	16.6% of matches from 2016-20 were internal applicants versus 24.9% in 2021 (p<0.004). The programs most likely to match their internal applicants from 2016-20 were Duke University (53.3%), University of Texas Medical Branch (35.0%), and Washington University (33.3%). In 2021, the institution that matched the most internal applicants was Georgetown. Of note, 13 programs that had previously not ta…	N/A	N/A	We found that 24.9% of students in the 2021 cycle matched at their home institution, compared to the 16.6% that matched previously in cycles from 2016-20. Factors that contributed to this increase in internal matching could include lack of away rotations, limited perception of outside plastic surgery programs, greater internal familiarity and VIs. Larger programs were more likely to match student…	N/A	1) The accuracy of public data may influence the results; 2) Applicants who did research years or away rotations may have skewed the results; 3) This study did not assess the impact of the pandemic for those without home program, osteopathic medical school graduates or IMGs.	The COVID-19 pandemic clearly impacted the plastic surgery residency match as the percentage of internal candidates selected was shown to increase significantly. With the uncertainty that surrounds the coming match cycles, these results are particularly valuable to applicants and PDs. As interviews may continue to be virtual and away rotations limited, it is unlikely the Match in 2022 will differ…	The geographic distribution was affected and applicants may wish to focus on local programs. Future research is needed to evaluate the impact of the pandemic on applicants without home programs, osteopathic applicants, and IMGs.	2	1.5	1.5	3	N/A	2	1	2
Yee et al.	From beginning to end: A single radiology residency program's experience with web-based resident recruitment during COVID-19 and a review of the literature	2021	residency	radiology	USA	This paper was both a literature review, a description of one institutions VI practices, and a survey study of applicants and interviewers experiences with VIs.	To review prior literature on VIs and examine perspectives of interviewers and applicants concerning VIs to determine if: (1) candidates can gather enough information virtually to assess a program’s educational environment and (2) programs can assess a candidate’s interpersonal skills, emotional intelligence, and likelihood to succeed; and to assess how VIs impact candidates’ and programs’ Match …	Interviews / candidate decreased from 4 to 3. Participating interviewers increased from 8 to 11. A virtual social was held the night before. The interview day lasted 5 hours, mirroring the IP experience, starting with a program overview. The morning session included a video tour of the medical center, featuring short interviews with residents & faculty members. The video included short segments s…	Quantitative	Survey	Before Match	16 interviewers (RR 73%), 35 applicants (RR 26%)	Satisfaction: A majority of interviewers had positive impressions of the VI; a majority of applicants thought the VI worked well or pretty well. Fit: applicants are comfortable or neutral with how VIs allow them to convey interest, though they are less confident in determining "fit" to make rank lists. Strengths / Weaknesses: Pros - simpler logistically, people able to interview from any location…	Satisfaction: 81% of interviewers felt VIs satisfactorily allowed them to connect with and properly interview candidates. Future: 75% looked forward to another VI season. 2 interviewers who were less enthusiastic commented that they value observing how applicants interact with others (peer interviewees; other interviewers, staff), body language during presentations or when glitches arise that are…	Fit: 46% felt it was easy to talk and connect via the VI, 46% felt it worked pretty well but felt they could have connected more effectively in person; 8% felt half the sessions were fine and the other half were strained. The majority of applicants were comfortable with or neutral about how effectively VIs allow them to convey their interest to a program; however, responses also show that applica…	8% increase in the number of applications. Interview slots increased by 25%.	N/A	N/A	N/A	N/A	N/A	Despite the benefit of improved efficiency and decreased cost, a substantial minority of applicants and interviewers are hesitant to exclusively rely on VIs due to insecurities around not being able to meet and observe people and groups. When the global pandemic allows for safe travel, the authors recommend PGME training programs provide VIs with the option for IP visits for applicants who remain…	Importance of website, social media presence. Keep messaging consistent and clear across all platforms: Program websites, social media, and during the interview day. Enlist the help of residents and maintain an authentic resident voice during recruitment.	1) Internal survey from single center; 2) small number of participants	The pandemic accelerated the transition from IPIs to VIs. With an ever-increasing awareness of medical student debt and the human impact of long-distance travel on carbon emissions, we may not wish to continue to justify the monetary and environmental costs of interview travel when a proven and tested alternative exists. Moreover, digital recruitment has the potential to create a more equitable r…	The benefits of VIs outweigh the drawbacks and should guide future decisions. PGME training programs will benefit all stakeholders by offering VIs with the option for IP visits for those applicants who remain uncomfortable relying exclusively on remote interactions prior to ranking a program. The ranking of candidates must be entirely uninformed by a candidates’ choice to visit in person. Engagin…	1	0.5	0.5	1	0	1	1	1
Yong et al.	Recommendations on the use of virtual interviews in the orthopaedic trauma fellowship match: A survey of applicant and fellowship director perspectives	2021	fellowship	orthopedic trauma surgery	USA	Cross-sectional survey of PDs and applicants about their feelings towards VIs amongst those applying for ortho trauma fellowships in 2019-20. During this interview cycle applicants completed some IPIs and some VIs due to COVID.	To assess applicant and PD perspectives on VIs based on the 2019-20 orthopedic trauma fellowship interview experience and to develop recommendations for future application cycles.	N/A	Quantitative Qualitative	Survey	After Match, before arrival in program	31 applicants (RR 34%), 23 PDs (RR 38%)	Fit: Applicants and PDs struggled to familiarize themselves with each other through Vis. Confidence: Both had lower confidence in ranking and tended to rank people / places with whom they had had IPIs. Strengths: cost, time. Weaknesses: reduced interactions with co-applicants / networking, difficulty assessing fit, unable to see facilities / location, unable to assess skill dexterity. Future: Mos…	Fit: Some PDs felt that they could familiarize themselves with applicants qualifications (50%) and personalities (50%) through VIs. 75% felt their ability to familiarize themselves with applicants was worse than IP. Confidence: Only 50% felt comfortable ranking applicants, and only 9% matched an applicant who completed a VI. Strengths: cost, time. Weaknesses: impersonality of VIs, difficulty gett…	Fit: During VIs, more respondents were able to familiarize themselves with the structure of a program (rotation schedule, call schedule, composition of the team, etc.) (52%) than the culture of the program (29%). Only 38% felt that they could portray themselves adequately in VIs. Confidence: 62% felt comfortable with ranking programs where they had completed a VI, and the format itself negatively…	Technical and scheduling difficulties were infrequently reported (29% and 19%, respectively). In general, respondents felt that the process could have been improved if programs supplied information about the fellowship in advance of the interview, afforded more consistent access to the current fellow(s), and were more organized overall.	58% would interview at more programs if there were access to virtual option.	N/A	N/A	A cost savings of $844 across the entire interview process would lead applicants to prefer VIs. PDs responded disparately on the cost savings needed to prefer Vis, with a range of $0 - $50,000).	N/A	While Vis appear to have a reasonable level of acceptance, both faculty and applicants had significant feelings about not being able to represent themselves well / assess fit, affecting confidence in ranking decisions. Despite advantages of cost / time savings, both applicants and faculty demonstrated a strong preference for VIs. Both were concerned if a choice was offered in the future, choosing…	Access to current fellows is an important part of the VI Process. Info about programs should be provided in advance of interviews (e.g. ppt, videos).	1) Low response rates. 2) Applicants who did not match are not represented in the study. 3) There may have been challenges in survey design leading to unusual responses. 4) The findings may not be transferable to other specialties. 5) This study focused on an interview season where applicant completed a relatively small # of VIs (most were IP) - perceptions may change with more experience	Vis are feasible and reasonable in times of pandemic, though there were multiple shortcomings with this first iteration. VIs could have a continued role, perhaps as part of a screening process, though there is a strong preference for an IP component.	Additional study is needed. Strong preferences for IPIs appear more prevalent in the studies conducted early in COVID where the majority of applicants completed mostly IPIs and only a few VIs. These studies were also conducted before programs were able to refine their process and offered an early glimpse at a time of rapid transition and stress. The preference for an IP component may be mitigated…	1	1.5	0.5	1	1	1	1	1
Zárate Rodriguez et al.	Applicants' perception of fit to residency programmes in the video-interview era: A large multidisciplinary survey	2022	residency	multiple dermatology, emergency medicine, general surgery, internal medicine, neurology, neurological surgery, orthopedic surgery, otolaryngology, pediatrics, plastic surgery, physical medicine and rehabilitation, radiology, urology	USA	Single institution, multi-disciplinary survey of applicants focused on assessment of "fit" in VIs. Fit was defined as perceived compatibility between applicants and programs, and noted to be impacted by a variety of subjective structural (e.g., organizational factors, quality of facilities, research offerings), identity-related factors (e.g., program characteristics such as gender / diversity dis…	To investigate how VIs affected applicants' ability to assess ‘fit’ to the programs at which they interviewed; To identify what factors were most important to participants and whether VIs allowed them to assess those factors easily; To determine whether applicant responses and self perceptions of fit differed by gender and race.	Virtual recruitment practices varied between participating programs. In addition to unstructured, semi-structured or structured VIs with faculty, program leadership and current residents, all programs partook in several additional activities including virtual open houses, virtual tours, asynchronous informational videos, assigned resident ambassadors, pre-interview ‘happy hours’ or virtual unstru…	Quantitative	Survey	Before Match	473 applicants (RR 25.7%)	Fit: The three most important factors to applicants for assessment of fit (how much the program seemed to care, how satisfied residents seem with their program and how well the residents get along) were also the factors most challenging to assess through VIs. EDI: Diversity-related factors were more important to female and non-white applicants. White male applicants self-assigned higher fit score…	N/A	Fit: The three most important factors for applicant fit: 1) how much the program seemed to care about its trainees (4.8/5), 2) how satisfied residents seem with their program (4.8) and 3) how well the residents get along with each other (4.7). The least important factors for applicants' definition of fit were call system structure and/or frequency (3.4), cost of living (3.3) and opportunities for…	N/A	N/A	N/A	N/A	N/A	N/A	This study is one of the largest applicant surveys to explore perceptions of ‘fit’ during VIs and, as such, provides unique insight into what medical students across the USA experienced. The concept of applicant ‘fit’, or a medical student's judgement of their perceived compatibility with a prospective program's ‘personality’, has been demonstrated to be the most important factor in determining r…	N/A	1) The manner in which applicants received the link to the survey may have impacted response rates. 2) While a large multidisciplinary survey, this study, only reflects the fraction of the applicant pool who self-selected to apply to one large academic institution. This led to overrepresentation of applicants from the Midwest and low rates of DO applicants, which might affect generalizability. 3)…	Increased efficiency, reduced costs and greater geographic diversity are benefits of VIs, whereas disadvantages include the potential for exacerbating inequities in residency application and recruitment, interview-hoarding and an inability to perform holistic application review. VIs affect applicants' ability to assess ‘fit’ to programs at which they interview, and significant discrepancies exist…	Difficulty assessing fit is one of the greatest drawbacks of VI. Increasing the visibility of female, URiM and LGBTQIA+ residents and faculty during VIs are important (though this must be done cautiously to not exacerbate the minority tax). Providing protected virtual spaces for minoritized applicants to connect with residents and faculty from similar backgrounds may be important. Future research…	1	0.5	0.5	1	0	1	1	1
Zhang et al.	To zoom or not to zoom: weighing the pros and cons of the virtual plastic surgery residency interview	2022	residency	integrated plastic surgery	USA	National survey of 2020-21 applicants interviewed virtually and current residents interviewed IP. Analysis compared the two groups in terms of perceived value of residency interview, as well as impact of conversion to virtual format.	To investigate current applicants' versus current residents' perceived value of residency interviews, as well as impact of conversion to VIs.	N/A	Quantitative	Survey	Unclear, but before arrival in program	38 applicants 2020-21; 41 current residents PGY1-6. RR unknown.	Preference: A hybrid of IP and VIs is preferred in the future. Fit: Applicants found it more difficult to get a "gut feeling" about programs, and found it more difficult to meet residents / assess morale. Cost: Applicants saved thousands of $ in travel expenses and missed less school. Weakness: Inability to create enduring networks with co-applicants.	N/A	Fit: Getting a “gut feeling” about a program, meeting the PD / chair, and meeting with residents /assessing morale were ranked as the most valuable aspects of the residency interview. However, 70% found it more difficult to get a "gut feeling" about programs, and 89% found it more difficult to meet residents / assess morale. Weaknesses: A perceived benefit of small residency applicant pools is th…	N/A	Current (89%) and past residents (80%) applied to at least 51 programs and attended at least 11 interviews (68%, 78% respectively).	N/A	N/A	All 2020-21 applicants reported spending <$6,000 with 65% spending <$500 for applications & VIs. 88% missed fewer than 7 days of school. Residents, who interviewed IP pre-COVID, reported spending at least $6,000 (65%), including 20% spending >$10,000. 78% missed at least 7 days of school and 29% missed at least 15 days.	N/A	VIs decreased financial/time costs, but limited ability to assess programs/culture and applicant-to-applicant networking. Only small number of residents preferred VIs, though a hybrid model may solve some of the deficiencies identified.	N/A	N/A	Hybrid of Vis and optional IP visits may maximize benefits and minimize costs of residency interviews.	Hybrid interview options should be explored for future application cycles. Retaining some cost-savings but allowing for some IP experiences to better assess intangibles, culture, etc.	2	0.5	0.5	1	0	1	1	1
APD = Associate Program Director; CGSO = Complex General Surgical Oncology; COVID-19 = Coronavirus Disease 2019; DO = Doctor of Osteopathic Medicine; EDI = Equity, Diversity and Inclusion; ENT = Ear, Nose, Throat, ERAS = Electronic Residency Application Service; GI = Gastroenterology IQR = interquartile range; IMGs = International Medical Graduates; IP = In-person; IPIs = In-person interviews; LG…
